# Supplementary material for: 近世史部会--笹本正治「近世の鋳物師と真継家」,塚田孝「三都の非人と非人集団」 (1984年度歴史学研究会大会報告批判)
Source: HighWire-hosted journal article supplement (doi:10.1101/gr.121749.111), 1984-12-01
Supplement: Supp_Figure_Legends1.docx [file Supp_Figure_Legends1.docx]

**Figure S1. Phylogenetic tree and the number of LTR retroelements and ZF domains detected in vertebrate genomes.** The phylogenetic tree was drawn by hand using estimates of branch points according to TimeTree data summaries (Hedges et al., 2006). The tree was also used for Independent Contrast calculations. At each tree tip the number of detected tandem ZF domains and LTR retroelements is proportional to the diameter of the circle. Following each species identifier is a summary of sequencing read coverage, derived from summaries given on the UCSC genome browser and the relevant genome sequencing center reports. Published genomes used in some analyses are boxed.

**Figure S2. Histograms of ZF domain profile matches.** Panel A shows the density of profile scores of human ZF domains in coding genes (red) and those in non-coding regions (blue). Most of the non-genic matches are associated with non-coding duplicates of ZF genes (pseudogenes). Panel B shows the frequencies of profile scores of ZF domains for representative genomes. The leftward tail in each histogram presumably represents (mostly) pseudogene matches.

**Figure S3. Histograms of LTR retroelement scores.** Each panel shows the summed scores for all detected LTR retroelements for representative mammalian genomes (see Supplemental Methods). Score sums below 50 were removed from the data because they may not be statistically significant. A large number of elements with high scores is suggestive of recent retroelement activity.

**Figure S4. Examples of DNA sequence trees of the internal regions of marmoset and Catarrhine LTR retroelements.** The left panel shows a tree of the internal sequences of representative LTR retroelements annotated by RepeatMasker as *HERV17* in marmoset and human, together with samples of the related *HERV9* and *HERV30* elements from human. Each inferred family of elements is shown in a different color. All of the marmoset (red, name prefix 'cjac') elements annotated as *HERV17*-int clearly cluster together and represent a distinct family of ERV that is approximately equally divergent from *HERV9*, *HERV17*, and *HERV30*. RepBase version 15.05 consensus sequences and a marmoset consensus sequence (derived from our multiple alignment of marmoset elements) are shown in black. Sequences annotated as *HERV9*-int, *HERV17*-int, and *HERV30*-int in chimpanzee, orangutan, and macaque tree interspersed as expected with the human elements of the same family (not shown). The right panel shows a representative tree that conforms to the expected pattern for an ERV family that first appeared before the branch point of Platyrrhines (red) and Catarrhines (green), with an outgroup family (mustard). In both panels, aLRT branch supports for key branches are shown and the scale bar indicates 10% nucleotide divergence as estimated on the maximum-likelihood tree.

**Figure S5. ZF domain matches are dominated by bona fide tandem ZF regions.** Each row shows a logo plot made from all the canonically spaced ZF domains (Cx2Cx12Hx3H) found in each genome with their upstream 7 amino acids added, and a histogram of the length of blocks of strictly tandem ZF domains among the same ZF domains. The data for the graphs were derived by extracting all genomic ORFs with 4 or more ZF domain matches with an average profile score of 50 or more, and retaining those that contain 4 or more ZF domains with canonical spacing (the vast majority for each genome). The zebrafish logo plot has a few differences from the others, but these are not shared in other fish (data not shown). Zebrafish also has shorter tandem ZF domain blocks and this pattern is shared with other fish (data not shown).

**Figure S6. Sites of positive selection in ZF domains among all species-specific expansions.** Bar plot of the number of sites at each position in the ZF domain with strong evidence of positive selection (codeml Bayes-Empirical-Bayes P-value 0.98 or higher, see Table S8). The X-axis is the position within the ZF domain. The canonical C2H2 residues that define the zinc finger are shown below the bars, together with the positions of major nucleotide contacts (italicized N).

**Figure S7. Examples of a duplicate gene pairs.** Panel A. Duplicate gene pair with an indeterminate ancestor. One copy each of *ZNF680* and *ZNF273* were identified in all five primate genomes. The top section shows an amino acid alignment of the 10 ZF domains broken onto two lines, with blue shading proportional to amino acid conservation. Black boxes outline each core ZF domain, with thickenings showing the DNA binding turn helix and the three major nucleotide contact residues. Red, orange, and green squares mark sites (nucleotide contact, nucleotide-contact adjacent, and other sites respectively) at which the duplicates diverged and each diverged sequence is invariant among the five species. Paled regions mark two fingers that are present in *ZNF680* but are presumably defective in *ZNF273* since they lack an essential zinc-coordinating residue. These defective fingers were not included in divergence numbers. A substantial segment of the macaque *ZNF680* gene was missing from the genome assembly (present in an NNN run). The tree at the lower left is a maximum-likelihood tree computed from an amino acid alignment of the entire ZF-encoding exon, with the three closest human paralogs included as an outgroup (grey). Black circles indicate branch support > 0.9 using the aLRT method. The sequence names on the tree give the positions of the exons in each genome assembly. The text at the lower right summarizes the pattern of changes between the duplicates. Species names on the alignment and tree are hsap (human), ptro (chimpanzee), ppyg (orangutan), mmul (macaque), and cjac (marmoset). Panels B and C. Two examples of duplicate gene pairs with an identified ancestor. Shading, black boxes, and red, green, and orange squares are as described for Panel A. Solid horizontal lines through the alignments separate the orthologs. Dashed lines through the alignments separate the conserved duplicate copies from the ancestral copies. Blue arrows show sites at which the divergent duplicate copy has a conserved change from the ancestral copy. The violet arrow shows a site at which the conserved duplicate changed. Sites with mixed divergence are indicated by the double blue and pink arrows. Paled regions indicate finger indels specific to one of the duplicates. Gray lines and arrows indicate that each indel is probably an insertion of fingers in the divergent duplicate that arose from an unequal cross-over in adjacent fingers (followed by divergence in the inserted fingers). This interpretation is supported by tblastn searches of the entire genome with the putative inserted ZF sequences as query, which identified the adjacent finger or fingers as the best genomic matches. The putative ancestral *ZNF736* gene (panel B) is present throughout primates and the divergent duplicate *ZNF727* is present only in chimpanzee and human. The putative ancestral *ZNF558* gene (panel C) is present in all Boreoeutheria (the rodent copies were excluded from the analysis, see Supplemental Methods) and the *ZNF557* divergent duplicate is present only in orangutan, chimpanzee, and human.

**Figure S8. Pairwise protein distance dendrograms of selected KZNF genes.** The trees are constructed for several genes together to make a compact illustration; all actual trees used to infer ancestry were group specific maximum-likelihood trees available on request.Panel A.Selected duplicate gene pairs. Primate sequences are colored in shades of green and brown (human - hsap, chimpanzee - ptro, orangutan - ppyg, macaque - mmul, and marmoset - cjac). Laurasiatheria sequences are colored in shades of blue (cow - btau, horse - ecab, and dog - cfam). Rodent sequences are colored in shades of red and purple (mouse - mmus, rat - rnor, and guinea pig - cpor). Duplicate pairs are marked to the right with a brief comment and interpretation for each. The dendrogram was made from the complete predicted coding region for each gene (Supplemental Methods), with the genome assembly start and end position of each gene indicated in the sequence name. The gene names are derived from the orthologous human gene and are included only for clarity. Important note – these are not phylogenetic trees. They are based only on pairwise distance measures clustered by neighbor joining because a meaningful multiple alignment cannot be made among these highly diverse groups of genes. There is no uniform distance metric and details of the dendrogram are not necessarily accurate, especially the joins deeper in the tree (leftward in the figure, as emphasized by paler branches). Occasional local anomalies on the dendrogram (e.g. the placement of orangutan *ZNF175*) are probably due to minor prediction errors or missing sequence, which influence the dendrogram clustering method. In addition, the branches joining divergent duplicates to their ancestral gene are not phylogenetically accurate. Occasional missing genes could be real gene losses or genes that are missing or very incomplete in their genome assembly. The positions of most rodent genes as branching before dog, cow, and horse is presumably due to the known increased rate of sequence evolution on the rodent lineage. Panel B. Ancient conserved KZNF genes. Primate sequences are labeled in green, Laurasiatheria sequences are labeled in blue, Rodentia sequences are labeled in brown, and opossum (mdom) sequences are labeled in red. Genes were defined as those with clear orthologs between human and opossum and additionally present in at least one Laurasiatheria and one Rodentia species. A single copy of each gene was found in each species except that *ZNF3* is absent from the guinea pig assembly. The slightly anomalous position of marmoset (cjac) *ZNF213* is an artifact of the pairwise distance method; in a maximum-likelihood tree from a *ZNF213* multiple alignment, marmoset *ZNF213* clusters with other primates as expected (data not shown). See also notes to Panel A.
