# Supplementary material for: 近世史部会--笹本正治「近世の鋳物師と真継家」,塚田孝「三都の非人と非人集団」 (1984年度歴史学研究会大会報告批判)
Source: HighWire-hosted journal article supplement (doi:10.1101/gr.121749.111), 1984-12-01
Supplement: Table_S1.docx [file Table_S1.docx]

| **Table S1. Data and statistical analysis of vertebrate LTR retroelement and ZF domain content** | | | | | | | | | | | |
| --- | --- | --- | --- | --- | --- | --- | --- | --- | --- | --- | --- |
|  |  |  |  |  |  |  |  |  |  |  |  |
| **Statistical Summaries:** |  |  |  |  |  |  |  |  |  |  |  |
|  |  | ORFs with 4 or more ZF domains | | | | | | | | | |
|  | | ZF4 minScore 40 | | ZF4 minScore 45 | | ZF4 minScore 50 | | ZF4 minScore 55 | | ZF4 minScore 60 | |
| LTR retroelement cutoff | ZF count type | R squared | P value | R squared | P value | R squared | P value | R squared | P value | R squared | P value |
| minScore 80 | ORF count | 0.300 | 3.8*10-03 | 0.318 | 2.7*10-03 | 0.363 | 1.1*10-03 | 0.436 | 2.4*10-04 | 0.575 | 7.2*10-06 |
| ZF count | 0.517 | 3.5*10-05 | 0.548 | 1.6*10-05 | 0.606 | 2.8*10-06 | 0.671 | 3.1*10-07 | 0.668 | 3.4*10-07 |
| minScore 150 | ORF count | 0.243 | 1.0*10-02 | 0.261 | 7.7*10-03 | 0.303 | 3.6*10-03 | 0.375 | 8.8*10-04 | 0.526 | 2.7*10-05 |
|  | ZF count | 0.455 | 1.6*10-04 | 0.486 | 7.6*10-05 | 0.546 | 1.6*10-05 | 0.617 | 2.0*10-06 | 0.638 | 9.8*10-07 |
| minScore 200 | ORF count | 0.222 | 1.5*10-02 | 0.238 | 1.1*10-02 | 0.281 | 5.4*10-03 | 0.352 | 1.4*10-03 | 0.513 | 3.9*10-05 |
| ZF count | 0.424 | 3.1*10-04 | 0.455 | 1.6*10-04 | 0.516 | 3.6*10-05 | 0.590 | 4.6*10-06 | 0.622 | 1.7*10-06 |
|  |  |  |  |  |  |  |  |  |  |  |  |
|  |  | whole genome ZF domains | | | | | | | | | |
|  |  | ZF minScore 40 | | ZF minScore 45 | | ZF minScore 50 | | ZF minScore 55 | | ZF minScore 60 | |
| LTR retroelement cutoff | ZF count type | R squared | P value | R squared | P value | R squared | P value | R squared | P value | R squared | P value |
| minScore 80 | ZF count | 0.493 | 6.4*10-05 | 0.532 | 2.4*10-05 | 0.597 | 3.7*10-06 | 0.661 | 4.5*10-07 | 0.682 | 2.0*10-07 |
| minScore 150 | ZF count | 0.431 | 2.7*10-04 | 0.470 | 1.1*10-04 | 0.537 | 2.1*10-05 | 0.607 | 2.7*10-06 | 0.645 | 7.8*10-07 |
| minScore 200 | ZF count | 0.401 | 5.2*10-04 | 0.437 | 2.4*10-04 | 0.503 | 5.0*10-05 | 0.574 | 7.5*10-06 | 0.618 | 2.0*10-06 |
|  |  |  |  |  |  |  |  |  |  |  |  |
|  |  | ORFs with 4 or more ZF domains | | | | | | | | | |
|  |  | ZF4 minScore 40 | | ZF4 minScore 45 | | ZF4 minScore 50 | | ZF4 minScore 55 | | ZF4 minScore 60 | |
| LTR diversity (tree length) | ZF count type | R squared | P value | R squared | P value | R squared | P value | R squared | P value | R squared | P value |
| ORF count | 0.184 | 2.9*10-02 | 0.199 | 2.2*10-02 | 0.244 | 1.0*10-02 | 0.327 | 2.3*10-03 | 0.559 | 1.1*10-05 |
| ZF count | 0.376 | 8.6*10-04 | 0.416 | 3.7*10-04 | 0.494 | 6.2*10-05 | 0.607 | 2.8*10-06 | 0.750 | 1.1*10-08 |
|  |  |  |  |  |  |  |  |  |  |  |  |

| **Other correlations:** |  |  |  |  |  |  |  |  |  |  |  |
| --- | --- | --- | --- | --- | --- | --- | --- | --- | --- | --- | --- |
|  | | R squared | P value |  |  |  |  |  |  |  |  |
| LTR minScore 80 | LINE-like | 0.183 | 0.05 |  |  |  |  |  |  |  |  |
| LTR minScore 80 | mammal Olf genes | 0.015 | 0.67 |  |  |  |  |  |  |  |  |
| LTR minScore 80 | mammal Olf pseudogenes | 0.003 | 0.84 |  |  |  |  |  |  |  |  |
| LTR minScore 80 | IG C1 domain count | 0.089 | 0.14 |  |  |  |  |  |  |  |  |
| LTR minScore 80 | IG V domain count | 0.027 | 0.42 |  |  |  |  |  |  |  |  |
| LTR minScore 80 | genome assembly size | 0.048 | 0.29 |  |  |  |  |  |  |  |  |
| ZF count minScore 55 | LINE-like | 0.063 | 0.26 |  |  |  |  |  |  |  |  |
| ZF count minScore 55 | genome assembly size | 0.385 | 0.11 |  |  |  |  |  |  |  |  |
| ZF count minScore 55 | LTR minScore 80 normalized to genome size | 0.581 | 6.0*10-06 |  |  |  |  |  |  |  |  |
|  |  |  |  |  |  |  |  |  |  |  |  |
| **Published genomes only, total annotated LTR content:** | |  |  |  |  |  |  |  |  |  |  |
| species | ZF domains minScore 55 | RepMask annotated length (LTR + internal sequence) | R squared | P value |  |  |  |  |  |  |  |
| opossum | 12807 | 345438106 | 0.3603 | 0.0180 |  |  |  |  |  |  |  |
| mouse | 6380 | 289890855 |  |  |  |  |  |  |  |  |  |
| orangutan | 4895 | 277238083 |  |  |  |  |  |  |  |  |  |
| human | 5340 | 359398096 |  |  |  |  |  |  |  |  |  |
| macaque | 4670 | 221455701 |  |  |  |  |  |  |  |  |  |
| chimpanzee | 5045 | 247609569 |  |  |  |  |  |  |  |  |  |
| rat | 4139 | 236203878 |  |  |  |  |  |  |  |  |  |
| cow | 3869 | 100311384 |  |  |  |  |  |  |  |  |  |
| dog | 3214 | 101481791 |  |  |  |  |  |  |  |  |  |
| platypus | 582 | 5796037 |  |  |  |  |  |  |  |  |  |
| zebrafish | 7988 | 76472359 |  |  |  |  |  |  |  |  |  |
| medaka | 1804 | 264009 |  |  |  |  |  |  |  |  |  |
| fugu | 237 | 2750721 |  |  |  |  |  |  |  |  |  |
| finch | 4437 | 42382077 |  |  |  |  |  |  |  |  |  |
| frog | 2604 | 5812504 |  |  |  |  |  |  |  |  |  |
| chicken | 543 | 14450218 |  |  |  |  |  |  |  |  |  |
|  |  |  |  |  |  |  |  |  |  |  |  |
| All R squared and P values were computed using Independent Contrasts with the correlation constrained to passing through the origin and a two-tailed P-value. | | | | | | | | | | | |

**Data:**

|  |  |  |  |  | |  | |  |  | |  | |  | |  | |  | |  | |  | |  | |  | |  | |  | | |  | | ORFs with 4 or more ZF domains | | | | | | | | | |  |  | |  | |  | |  | |  |  |  |  |  |  |  |  |  |
| --- | --- | --- | --- | --- | --- | --- | --- | --- | --- | --- | --- | --- | --- | --- | --- | --- | --- | --- | --- | --- | --- | --- | --- | --- | --- | --- | --- | --- | --- | --- | --- | --- | --- | --- | --- | --- | --- | --- | --- | --- | --- | --- | --- | --- | --- | --- | --- | --- | --- | --- | --- | --- | --- | --- | --- | --- | --- | --- | --- | --- | --- |
|  |  |  |  |  | |  | |  |  | |  | |  | |  | |  | |  | |  | |  | |  | |  | |  | | |  | | minScore 40 | | minScore 45 | | minScore 50 | | minScore 55 | | minScore 60 | | total genomic ZF domains | | | | | | | | |  |  |  |  |  |  |  |  |  |
| species | database version | ACGT genome assembly size | RepMask LINE length | RepMask LTR length | | LTR 80-150 | | LTR 150-200 | LTR 200-250 | | LTR 250up | | LTR branch length (blast) | | LTR branch length (ML) | | LINE 60-100 | | LINE 100-150 | | LINE 150-200 | | LINE 200up | | IG C1 domain | | IG V domain | | OR functional (Hayden) | | | OR pseudo (Hayden) | | ORFs | total fingers | ORFs | total fingers | ORFs | total fingers | ORFs | total fingers | ORFs | total fingers | minScore 40 | | minScore 45 | | minScore 50 | | minScore 55 | | minScore 60 | genomic KRAB domains |  |  |  |  |  |  |  |  |
| Monodelphis domestica (opossum) | monDom5 | 3501643220 | 1056459444 | 345438106 | | 1192 | | 1280 | 1261 | | 3034 | | 1121.7 | | ND | | 18840 | | 32188 | | 2689 | | 440 | | 106 | | 506 | | 1273 | | | 110 | | 1127 | 13629 | 1082 | 13199 | 1020 | 12563 | 967 | 11643 | 904 | 10211 | 15828 | | 15044 | | 14032 | | 12807 | | 11143 | 934 |  |  |  |  |  |  |  |  |
| Cavia porcellus (guinea pig) | cavPor3 | 2663352932 | 392836933 | 120922391 | | 717 | | 453 | 279 | | 1612 | | 293.5 | | ND | | 10426 | | 11669 | | 768 | | 44 | | 111 | | 601 | | 561 | | | 1120 | | 1360 | 12705 | 1231 | 11350 | 1054 | 9391 | 852 | 6854 | 449 | 2916 | 15861 | | 13667 | | 11006 | | 8156 | | 4202 | 807 |  |  |  |  |  |  |  |  |
| Mus musculus (mouse) | mm9 | 2617627118 | 538302066 | 289890855 | | 541 | | 458 | 421 | | 3494 | | 578.8 | | ND | | 9910 | | 22418 | | 844 | | 179 | | 125 | | 534 | | 1190 | | | 74 | | 677 | 7626 | 634 | 7135 | 599 | 6555 | 555 | 5715 | 480 | 4313 | 9204 | | 8335 | | 7460 | | 6380 | | 4823 | 659 |  |  |  |  |  |  |  |  |
| Pongo pygmaeus (orangutan) | ponAbe2 | 3091708170 | 687049053 | 277238083 | | 498 | | 592 | 412 | | 625 | | 260.6 | | ND | | 12772 | | 14430 | | 780 | | 329 | | 84 | | 340 | | 511 | | | 420 | | 663 | 6391 | 630 | 6036 | 590 | 5502 | 536 | 4780 | 444 | 3671 | 7091 | | 6481 | | 5745 | | 4895 | | 3835 | 576 |  |  |  |  |  |  |  |  |
| Homo sapiens (human) | hg18 | 2844730767 | 850110775 | 359398096 | | 456 | | 876 | 525 | | 1040 | | 316.3 | | ND | | 12269 | | 15382 | | 618 | | 105 | | 124 | | 388 | | 581 | | | 252 | | 589 | 6199 | 563 | 5882 | 521 | 5382 | 480 | 4706 | 411 | 3700 | 7622 | | 6990 | | 6210 | | 5340 | | 4227 | 536 |  |  |  |  |  |  |  |  |
| Loxodonta africana (elephant) | loxAfr3 | 3118548474 | 903361630 | 209661419 | | 1746 | | 998 | 268 | | 219 | | 522.9 | | ND | | 66718 | | 57135 | | 4798 | | 846 | | 176 | | 405 | | 1988 | | | 2376 | | 590 | 6130 | 561 | 5785 | 531 | 5349 | 488 | 4702 | 409 | 3607 | 7487 | | 6866 | | 6145 | | 5278 | | 4077 | 510 |  |  |  |  |  |  |  |  |
| Macaca mulatta (macaque) | rheMac2 | 2870775727 | 553795251 | 221455701 | | 362 | | 422 | 376 | | 742 | | 268.8 | | ND | | 10198 | | 10354 | | 527 | | 70 | | 97 | | 338 | | 464 | | | 269 | | 519 | 5451 | 495 | 5165 | 467 | 4742 | 425 | 4144 | 363 | 3276 | 6642 | | 6096 | | 5394 | | 4670 | | 3719 | 420 |  |  |  |  |  |  |  |  |
| Pan troglodytes (chimpanzee) | panTro2 | 2886534993 | 614641339 | 247609569 | | 490 | | 554 | 376 | | 731 | | 269.4 | | ND | | 12692 | | 13868 | | 794 | | 289 | | 96 | | 300 | | 550 | | | 315 | | 596 | 5998 | 567 | 5679 | 528 | 5207 | 478 | 4530 | 412 | 3586 | 7435 | | 6738 | | 5962 | | 5045 | | 4012 | 535 |  |  |  |  |  |  |  |  |
| Papio hamadryas (baboon) | papHam1 | 2761826660 | NA | NA | | 424 | | 286 | 157 | | 185 | | 193.6 | | 153.9 | | 10733 | | 2875 | | 74 | | 3 | | 115 | | 288 | | NA | | | NA | | 572 | 5441 | 539 | 5125 | 496 | 4642 | 447 | 4043 | 377 | 3145 | 6849 | | 6243 | | 5492 | | 4721 | | 3735 | 480 |  |  |  |  |  |  |  |  |
| Callithrix jacchus (marmoset) | calJac3 | 2929124957 | 598784758 | 207435719 | | 425 | | 307 | 218 | | 469 | | 245.1 | | 189.9 | | 12842 | | 11956 | | 753 | | 184 | | 150 | | 306 | | NA | | | NA | | 524 | 5403 | 495 | 5108 | 458 | 4689 | 421 | 4133 | 362 | 3254 | 7009 | | 6389 | | 5647 | | 4891 | | 3883 | 482 |  |  |  |  |  |  |  |  |
| Equus caballus (horse) | equCab2 | 2454407628 | 543179729 | 144955862 | | 325 | | 178 | 135 | | 140 | | 135.9 | | 109.3 | | 9406 | | 8619 | | 604 | | 48 | | 163 | | 399 | | 1459 | | | 852 | | 486 | 5091 | 465 | 4823 | 428 | 4385 | 388 | 3770 | 336 | 2922 | 5988 | | 5524 | | 4918 | | 4202 | | 3270 | 445 |  |  |  |  |  |  |  |  |
| Rattus norvegicus (rat) | rn4 | 2477053777 | 583884382 | 236203878 | | 354 | | 266 | 230 | | 1051 | | 229.3 | | ND | | 12542 | | 26676 | | 2068 | | 1706 | | 106 | | 674 | | 1420 | | | 293 | | 498 | 5222 | 467 | 4867 | 429 | 4354 | 388 | 3658 | 328 | 2594 | 6377 | | 5800 | | 5024 | | 4139 | | 2988 | 472 |  |  |  |  |  |  |  |  |
| Bos taurus (cow) | bosTau4 | 2731796898 | 626246310 | 100311384 | | 367 | | 310 | 266 | | 651 | | 164.9 | | 130.3 | | 52059 | | 71348 | | 8276 | | 3277 | | 119 | | 540 | | 1583 | | | 798 | | 476 | 4595 | 443 | 4259 | 403 | 3812 | 357 | 3275 | 285 | 2457 | 5785 | | 5224 | | 4540 | | 3869 | | 2986 | 375 |  |  |  |  |  |  |  |  |
| Canis familiaris (dog) | canFam2 | 2384979816 | 482138327 | 101481791 | | 91 | | 40 | 31 | | 72 | | 45.5 | | 38.8 | | 6991 | | 7151 | | 886 | | 74 | | 102 | | 397 | | 883 | | | 161 | | 369 | 3826 | 352 | 3621 | 330 | 3328 | 304 | 2932 | 262 | 2342 | 4562 | | 4154 | | 3694 | | 3214 | | 2595 | 306 |  |  |  |  |  |  |  |  |
| Oryctolagus cuniculus (rabbit) | oryCun2 | 2604006039 | 437510567 | 107548734 | | 133 | | 106 | 83 | | 392 | | 100.3 | | 83.2 | | 7760 | | 9184 | | 995 | | 43 | | 91 | | 435 | | 604 | | | 373 | | 460 | 4413 | 436 | 4185 | 389 | 3749 | 344 | 3307 | 301 | 2716 | 5686 | | 5173 | | 4557 | | 3948 | | 3226 | 394 |  |  |  |  |  |  |  |  |
| Ornithorynchus anatinus (platypus) | ornAna1 | 1842235522 | 398091329 | 5796037 | | 26 | | 29 | 26 | | 40 | | 20.0 | | 15.7 | | 7097 | | 2271 | | 87 | | 26 | | 75 | | 307 | | 433 | | | 313 | | 95 | 775 | 81 | 681 | 74 | 590 | 62 | 458 | 41 | 304 | 1210 | | 996 | | 775 | | 582 | | 405 | 58 |  |  |  |  |  |  |  |  |
| Danio rerio (zebrafish) | zv8/danRer6 | 1506876822 | 40076235 | 76472359 | | 1047 | | 959 | 1468 | | 1185 | | 175.1 | | ND | | 2470 | | 1824 | | 58 | | 26 | | 112 | | 923 | | NA | | | NA | | 1554 | 13209 | 1459 | 11448 | 1278 | 9364 | 960 | 6561 | 527 | 3145 | 14677 | | 12812 | | 10629 | | 7988 | | 4512 | 0 |  |  |  |  |  |  |  |  |
| Pteromyzon marinus (lamprey) | petMar1 | 831696438 | NA | NA | | 522 | | 548 | 306 | | 52 | | 177.0 | | ND | | 3411 | | 1752 | | 109 | | 25 | | 11 | | 145 | | NA | | | NA | | 716 | 5349 | 674 | 4995 | 610 | 4497 | 511 | 3633 | 329 | 2033 | 6357 | | 5945 | | 5393 | | 4493 | | 2876 | 0 |  |  |  |  |  |  |  |  |
| Oryzias latipes (medaka) | oryLat2 | 700386597 | 404989 | 264009 | | 274 | | 363 | 320 | | 222 | | 123.6 | | 138.2 | | 3749 | | 1431 | | 197 | | 52 | | 131 | | 611 | | NA | | | NA | | 479 | 3622 | 429 | 3072 | 366 | 2344 | 216 | 1158 | 19 | 95 | 4442 | | 3758 | | 2876 | | 1804 | | 563 | 0 |  |  |  |  |  |  |  |  |
| Gasterosteus aculeatus (stickleback) | gasAcu1 | 446612119 | 3446483 | 1536218 | | 129 | | 125 | 132 | | 223 | | 43.0 | | 55.8 | | 946 | | 452 | | 32 | | 17 | | 104 | | 739 | | NA | | | NA | | 118 | 773 | 83 | 512 | 48 | 285 | 13 | 55 | 0 | 0 | 1238 | | 886 | | 523 | | 225 | | 60 | 0 |  |  |  |  |  |  |  |  |
| Takifugu rubripes (fugu) | JGI4.0/fr2 | 351195798 | 10118902 | 2750721 | | 88 | | 114 | 113 | | 54 | | 42.8 | | 42.7 | | 1084 | | 617 | | 49 | | 15 | | 64 | | 442 | | NA | | | NA | | 86 | 551 | 60 | 364 | 38 | 224 | 14 | 72 | 0 | 0 | 1112 | | 781 | | 463 | | 237 | | 69 | 0 |  |  |  |  |  |  |  |  |
| Tetraodon nigroviridus (tetraodon) | tetNig1 | 312394419 | NA | NA | | 28 | | 30 | 21 | | 47 | | 16.7 | | 16.6 | | 393 | | 154 | | 12 | | 1 | | 49 | | 315 | | NA | | | NA | | 72 | 453 | 53 | 333 | 33 | 198 | 22 | 122 | 10 | 41 | 975 | | 690 | | 405 | | 232 | | 95 | 0 |  |  |  |  |  |  |  |  |
| Anolis carolinensis (lizard) | anoCar1 | 1741478929 | NA | NA | | 548 | | 1046 | 1824 | | 4260 | | 611.9 | | ND | | 14075 | | 13248 | | 950 | | 312 | | 78 | | 284 | | NA | | | NA | | 1174 | 14527 | 1143 | 13959 | 1103 | 13146 | 1034 | 11551 | 875 | 8186 | 16037 | | 15275 | | 14213 | | 12501 | | 9093 | 340 |  |  |  |  |  |  |  |  |
| Taeniopygia guttata (finch) | taeGut1 | 1222848000 | 39456769 | 42382077 | | 107 | | 123 | 122 | | 457 | | 63.4 | | 59.1 | | 909 | | 128 | | 6 | | 0 | | 39 | | 231 | | NA | | | NA | | 736 | 4690 | 725 | 4586 | 705 | 4385 | 655 | 3806 | 442 | 2234 | 5505 | | 5276 | | 4969 | | 4437 | | 3287 | 5 |  |  |  |  |  |  |  |  |
| Xenopus tropicalis (frog) | JGI4 | 1356860127 | 43407992 | 5812504 | | 587 | | 772 | 383 | | 322 | | 116.5 | | 110.5 | | 5867 | | 3773 | | 323 | | 139 | | 239 | | 604 | | NA | | | NA | | 513 | 4738 | 476 | 4105 | 430 | 3283 | 323 | 2015 | 88 | 472 | 5515 | | 4783 | | 3836 | | 2604 | | 1144 | 31 |  |  |  |  |  |  |  |  |
| Gallus gallus (chicken) | galGal3 | 1042566360 | 65599880 | 14450218 | | 197 | | 128 | 108 | | 131 | | 54.5 | | 49.1 | | 4342 | | 1710 | | 157 | | 32 | | 37 | | 298 | | NA | | | NA | | 89 | 674 | 82 | 616 | 78 | 563 | 62 | 398 | 25 | 140 | 1142 | | 934 | | 747 | | 543 | | 300 | 72 |  |  |  |  |  |  |  |  |
|  |  |  |  |  | |  | |  |  | |  | |  | |  | |  | |  | |  | |  | |  | |  | |  | | |  | |  |  |  |  |  |  |  |  |  |  |  | |  | |  | |  | |  |  |  |  |  |  |  |  |  |  |
| NA = not available. | | | |  | |  | |  |  | |  | |  | |  | |  | |  | |  | |  | |  | |  | |  | | |  | |  |  |  |  |  |  |  |  |  |  |  | |  | |  | |  | |  |  |  |  |  |  |  |  |  |  |
| ND = not done (ML tree memory exceeded available). | | | |  | |  | |  |  | |  | |  | |  | |  | |  | |  | |  | |  | |  | |  | | |  | |  |  |  |  |  |  |  |  |  |  |  | |  | |  | |  | |  |  |  |  |  |  |  |  |  |  |
| RepMask LINE and LTR lengths and counts are based on the current RepMask tracks on the UCSC browser for each genome. Count is the total number of DNA segments matching each class of elements and length is their total length in nucleotides. | | | | | | | | | | | | | | | | | | | | | | | | | | | | | | | | | |  |  |  |  |  |  |  |  |  |  |  | |  | |  | |  | |  |  |  |  |  |  |  |  |  |  |
| Genomic KRAB domains are rpsblast matches with a minimum score of 50 to the Pfam profile PF01352 (KRAB-A). The score cutoff was chose to give a good approximation of the number of KRAB-A domains in the human genome. Fish lack KRAB domains even at much lower score cutoffs. | | | | | | | | | | | | | | | | | | | | | | | | | | | | | | |  | |  |  |  |  |  |  |  |  |  |  |  |  | |  | |  | |  | |  |  |  |  |  |  |  |  |  |  |
| Other definitions are as given in Table 1 and Supplemental Methods. | | | | |  | |  | | |  | |  | |  | |  | |  | |  | |  | |  | |  | |  | |  |  | |  |  |  |  |  |  |  |  |  |  |  |  | |  | |  | |  | |  |  |  |  |  |  |  |  |  |  |
