# Supplementary material for: 近世史部会--笹本正治「近世の鋳物師と真継家」,塚田孝「三都の非人と非人集団」 (1984年度歴史学研究会大会報告批判)
Source: HighWire-hosted journal article supplement (doi:10.1101/gr.121749.111), 1984-12-01
Supplement: Table_S2.docx [file Table_S2.docx]

| **Table S2. Correlations of genomic LTR retroelements and ZF domains** | | | | |
| --- | --- | --- | --- | --- |
|  |  |  |  |  |
| genome | comparison basis | bin size 1 | R-squared | P-value (ANOVA) |
| acar | our data 2 | 100,000 | 3.07*10-04 | 1.87*10-02 |
| acar | our data | 1,000,000 | 4.90*10-04 | 3.39*10-01 |
| btau | our data | 100,000 | 2.67*10-03 | 2.20*10-16 |
| cfam | our data | 100,000 | 7.61*10-04 | 1.13*10-05 |
| cjac | our data | 100,000 | 1.05*10-03 | 5.12*10-08 |
| cpor | our data | 100,000 | 3.90*10-03 | 2.20*10-16 |
| drer | our data | 100,000 | 3.52*10-04 | 2.27*10-02 |
| drer | our data | 1,000,000 | 1.68*10-03 | 1.32*10-01 |
| ecab | our data | 100,000 | 5.22*10-03 | 2.20*10-16 |
| gacu | our data | 100,000 | 1.42*10-03 | 1.03*10-02 |
| ggal | our data | 100,000 | 2.16*10-03 | 1.07*10-06 |
| hsap | RepeatMasker 3 | 100,000 | 3.20*10-03 | 2.20*10-16 |
| hsap | RepeatMasker | 1,000,000 | 6.50*10-03 | 2.20*10-16 |
| hsap | our data | 100,000 | 4.15*10-03 | 2.20*10-16 |
| hsap | our data | 1,000,000 | 3.64*10-02 | 2.20*10-16 |
| lafr | our data | 100,000 | 2.41*10-03 | 2.20*10-16 |
| mdom | our data | 100,000 | 1.73*10-04 | 1.39*10-02 |
| mdom | our data | 1,000,000 | 1.39*10-03 | 2.73*10-02 |
| mmul | our data | 100,000 | 5.53*10-03 | 2.20*10-16 |
| mmus | RepeatMasker | 100,000 | 1.40*10-02 | 2.20*10-16 |
| mmus | RepeatMasker | 1,000,000 | 5.70*10-02 | 2.20*10-16 |
| mmus | our data | 100,000 | 4.40*10-03 | 2.20*10-16 |
| mmus | our data | 1,000,000 | 3.04*10-02 | 2.20*10-16 |
| oana | our data | 100,000 | 1.74*10-04 | 1.28*10-01 |
| ocun | our data | 100,000 | 2.00*10-03 | 1.24*10-13 |
| olat | our data | 100,000 | 2.58*10-04 | 1.43*10-01 |
| pham | our data | 10,000 | 2.87*10-06 | 3.94*10-01 |
| pmar | our data | 10,000 | 8.84*10-07 | 7.45*10-01 |
| ppyg | our data | 100,000 | 2.75*10-03 | 2.20*10-16 |
| ptro | our data | 100,000 | 3.76*10-03 | 2.20*10-16 |
| rnor | our data | 100,000 | 3.93*10-03 | 2.20*10-16 |
| tgut | our data | 100,000 | 2.58*10-02 | 2.20*10-16 |
| tnig | our data | 100,000 | 1.24*10-04 | 5.04*10-01 |
| trub | our data | 100,000 | 2.36*10-04 | 3.31*10-01 |
| xtro | our data | 100,000 | 5.94*10-06 | 7.71*10-01 |
| mean (100 Kb bin, our data): | | | 2.99*10-03 |  |
| eutherian mammal mean (100 Kb bin, our data): | | | 3.27*10-03 |  |
|  |  |  |  |  |
| 1 Contigs less than half the length of the bin size were excluded from the counts to reduce over-representing zero match classes in short contigs. Contigs for pham (baboon) and pmar (lamprey) are small, so a smaller bin size was used. | | | | |
| 2 Counts in each genomic bin are from data summarized in Table S1. Specifically, the LTR retroelement counts are from all elements (minScore 80), and the ZF counts are the numbers of ZF domains in ORFs with four or more fingers (minScore 55). These are the same data shown in main text Figure 1. | | | | |
| 3 LTR retroelement counts in each genomic bin are the number of individual LTR class segments reported in the current RepeatMasker table from the UCSC genome site. The ZF domain counts are from total genomic ZF domains (minScore 55). | | | | |
