# Supplementary material for: 近世史部会--笹本正治「近世の鋳物師と真継家」,塚田孝「三都の非人と非人集団」 (1984年度歴史学研究会大会報告批判)
Source: HighWire-hosted journal article supplement (doi:10.1101/gr.121749.111), 1984-12-01
Supplement: Table_S3.docx [file Table_S3.docx]

| **Table S3. Correlations between recent LTR retroelements and recent ZF duplicates** | | | | |  |  |  |  |  |  |
| --- | --- | --- | --- | --- | --- | --- | --- | --- | --- | --- |
|  |  |  |  |  |  |  |  |  |  |  |
| 90% LTR identity, 0.1 dS ZF ORF | | |  |  |  |  |  |  |  |  |
|  | LTR num | LTR diversity | ZF ORF count | ZF domain count |  | 90% LTR, 0.1 dS | |  |  |  |
| acar | 4996 | 52.3 | 301 | 3456 |  |  | LTR num vs ZF ORF | LTR num vs ZF domain | LTR div vs ZF ORF | LTR div vs ZF domain |
| btau | 420 | 29.8 | 70 | 741 |  | p | 0.04740 | 0.00982 | 0.02649 | 0.00683 |
| cfam | 40 | 4.8 | 13 | 106 |  | R squared | 0.17438 | 0.27741 | 0.21337 | 0.29990 |
| cjac | 184 | 16.6 | 20 | 171 |  |  |  |  |  |  |
| cpor | 1384 | 32.4 | 501 | 4457 |  | P and R squared values were computed using Independent Contrasts. | | | | |
| drer | 1741 | 73.7 | 823 | 7948 |  |  |  |  |  |  |
| ecab | 68 | 6.6 | 17 | 119 |  |  |  |  |  |  |
| gacu | 254 | 17 | 13 | 91 |  |  |  |  |  |  |
| ggal | 115 | 8.2 | 57 | 421 |  |  |  |  |  |  |
| hsap | 887 | 52.5 | 44 | 468 |  |  |  |  |  |  |
| lafr | 58 | 10.7 | 33 | 297 |  |  |  |  |  |  |
| mdom | 1228 | 57.4 | 180 | 1854 |  |  |  |  |  |  |
| mmul | 366 | 30.4 | 21 | 213 |  |  |  |  |  |  |
| mmus | 2958 | 52.2 | 184 | 2026 |  |  |  |  |  |  |
| oana | 23 | 2.8 | 1 | 6 |  |  |  |  |  |  |
| ocun | 245 | 16.9 | 55 | 521 |  |  |  |  |  |  |
| olat | 517 | 48.8 | 96 | 668 |  |  |  |  |  |  |
| pmar | 211 | 19.5 | 364 | 2612 |  |  |  |  |  |  |
| rnor | 665 | 22 | 73 | 791 |  |  |  |  |  |  |
| tgut | 206 | 14.6 | 416 | 2629 |  |  |  |  |  |  |
| tnig | 52 | 6 | 4 | 24 |  |  |  |  |  |  |
| trub | 89 | 10.6 | 8 | 47 |  |  |  |  |  |  |
| xtro | 600 | 38.3 | 87 | 753 |  |  |  |  |  |  |
|  |  |  |  |  |  |  |  |  |  |  |
|  |  |  |  |  |  |  |  |  |  |  |
| 95% LTR identity, 0.05 dS ZF ORF | | |  |  |  |  |  |  |  |  |
|  | LTR num | LTR diversity | ZF ORF count | ZF domain count |  | 95% LTR, 0.5 dS | |  |  |  |
| acar | 4642 | 48.1 | 181 | 1975 |  |  | LTR num vs ZF ORF | LTR num vs ZF domain | LTR div vs ZF ORF | LTR div vs ZF domain |
| btau | 192 | 10.7 | 65 | 661 |  | p | 0.04821 | 0.00434 | 0.00171 | 0.00033 |
| cfam | 19 | 2.5 | 12 | 101 |  | R squared | 0.17324 | 0.24719 | 0.38063 | 0.46651 |
| cjac | 73 | 7.1 | 12 | 114 |  |  |  |  |  |  |
| cpor | 1176 | 21.2 | 359 | 3109 |  | P and R squared values were computed using Independent Contrasts. | | | | |
| drer | 1520 | 57.8 | 740 | 7186 |  |  |  |  |  |  |
| ecab | 31 | 3.3 | 9 | 60 |  |  |  |  |  |  |
| gacu | 237 | 15.3 | 10 | 74 |  |  |  |  |  |  |
| ggal | 80 | 5.9 | 54 | 401 |  |  |  |  |  |  |
| hsap | 391 | 15.2 | 26 | 275 |  |  |  |  |  |  |
| lafr | 10 | 1.8 | 23 | 205 |  |  |  |  |  |  |
| mdom | 865 | 31.4 | 107 | 1048 |  |  |  |  |  |  |
| mmul | 170 | 11.6 | 8 | 60 |  |  |  |  |  |  |
| mmus | 2562 | 26.6 | 133 | 1446 |  |  |  |  |  |  |
| oana | 8 | 1.1 | 1 | 6 |  |  |  |  |  |  |
| ocun | 172 | 11.2 | 35 | 294 |  |  |  |  |  |  |
| olat | 394 | 37.4 | 65 | 404 |  |  |  |  |  |  |
| pmar | 78 | 8.8 | 265 | 1818 |  |  |  |  |  |  |
| rnor | 476 | 12.7 | 44 | 476 |  |  |  |  |  |  |
| tgut | 141 | 11 | 223 | 1407 |  |  |  |  |  |  |
| tnig | 38 | 4.3 | 4 | 24 |  |  |  |  |  |  |
| trub | 58 | 7.7 | 5 | 29 |  |  |  |  |  |  |
| xtro | 483 | 31.5 | 58 | 493 |  |  |  |  |  |  |
