# Supplementary material for: 近世史部会--笹本正治「近世の鋳物師と真継家」,塚田孝「三都の非人と非人集団」 (1984年度歴史学研究会大会報告批判)
Source: HighWire-hosted journal article supplement (doi:10.1101/gr.121749.111), 1984-12-01
Supplement: Table_S4.docx [file Table_S4.docx]

**Table S4. Summary of primate ERV families.**

| Literature names | RepBase current name (4/2011) | RepBase 15.05 name | internal length | number in human hg18 (>= 0.5 internal length) | autonomy | approximate origin and notes |
| --- | --- | --- | --- | --- | --- | --- |
|  | *HERV35I-int* | *HERV35I* | 6918 | 26 | non-autonomous | Basal Primate confirmed by MLTree, 0.315 divergent from *HUERS-P1-int* |
|  | *LTR23-int* | *HERV23* | 4843 | 2 |  | Basal Primate confirmed by MLTree |
|  | *LTR25-int* | *LTR25-int* | 7188 | 37 |  | Basal Primate probable by MLTree |
|  | *LTR57-int* | *HERV57I* | 5343 | 15 |  | Basal Primate confirmed by MLTree |
|  | *MER101-int* | *MER101_I* | 6639 | 10 |  | Basal Primate confirmed by MLTree |
|  | *MER4-int* | *MER4I* | 6387 | 208 | probably non-autonomous | Basal Primate confirmed by MLTree |
|  | *MER61-int* | *MER61I* | 5217 | 178 | probably non-autonomous | Basal Primate probable by MLTree |
|  | *PRIMAX-int* | *PRIMAX_I* | 4102 | 39 |  | Basal Primate confirmed by MLTree |
|  | *HERV1_I-int* | *HERV1_I* | 8801 | 10 |  | Catarrhini robust by MLTree and insertion sites, 0.600 divergent from *HERV15-int* |
| *RRHERV-I* | *HERV15-int* | *HERV15I* | 8735 | 10 |  | Catarrhini robust by MLTree and insertion sites, 0.545 divergent from *HERV3-int* |
| *HERV-W* | *HERV17-int* | *HERV17* | 8626 | 82 |  | Catarrhini robust by MLTree and insertion sites, 0.900 divergent from *HERV30-int* |
|  | *HERV30-int* | *HERV30I* | 8257 | 13 |  | Catarrhini robust by MLTree and insertion sites, 0.435 divergent from *HERV9-int* |
| *ERV-9, HERV-9* | *HERV9-int* | *HERV9* | 8399 | 185 |  | Catarrhini robust by MLTree and insertion sites, 0.435 divergent from *HERV30-int* |
|  | *HERVE_a-int* |  | 7847 | 34 |  | Catarrhini confirmed by MLTree and insertion sites, 0.215 divergent from *HERVE-int* |
| *HERV-E* | *HERVE-int* | *HERVE* | 7813 | 67 |  | Catarrhini robust by MLTree and insertion sites, 0.215 divergent from *HERVE_a-int* |
| *HERV-FXA, HERV-FXA34(21B1), HERV-FXA34(21B2)* | *HERVFH21-int* | *HERVFH21I* | 6529 | 19 |  | Catarrhini by insertion sites (Simian marginally possible by MLTree) |
| *HERV-H* | *HERVH-int* | *HERVH* | 7713 | 913 |  | Catarrhini robust by MLTree and insertion sites |
| *HERV-K HML-7* | *HERVK11D-int* | *HERVK11DI* | 7752 | 9 |  | Catarrhini robust by MLTree and insertion sites, 0.862 divergent from *HERVK11-int* |
| *HERV-K HML-8* | *HERVK11-int* | *HERVK11I* | 7953 | 43 |  | Catarrhini robust by MLTree and insertion sites, 0.862 divergent from *HERVK11D-int* |
| *HERV-K HML-4* | *HERVK13-int* | *HERVK13I* | 8116 | 8 |  | Catarrhini robust by MLTree and insertion sites, 0.937 divergent from *HERVK-int* |
| *HERV-K HML-10, HERVK-14C* | *HERVK14C-int* | *HERV-K14CI* | 7434 | 12 |  | Catarrhini robust by MLTree and insertion sites, 0.739 divergent from *HERVK-int* |
| *HERV-K HML1, HERV-K14I* | *HERVK14-int* | *HERV-K14I* | 6096 | 25 |  | Catarrhini robust by MLTree and insertion sites, 0.871 divergent from *HERVK14C-int* |
| *HERV-K HML-6* | *HERVK3-int* | *HERVK3I* | 7242 | 36 |  | Catarrhini robust by MLTree and insertion sites |
| *HERV-K HML-3* | *HERVK9-int* | *HERVK9I* | 6021 | 167 |  | Catarrhini confirmed by insertion sites |
| *HERV-K C4* | *HERVKC4-int* | *HERVKC4* | 5262 | 6 |  | Catarrhini robust by MLTree and insertion sites, 0.798 divergent from *HERVK14C-int* |
| *HERV-K, HERV-K HML-2* | *HERVK-int* | *HERVK* | 7536 | 54 |  | Catarrhini robust by MLTree and insertion sites, 0.739 divergent from *HERVK14C-int* |
| *HERV-T, S71* | *HERVS71-int* | *HERVS71* | 8978 | 32 |  | Catarrhini robust by MLTree and insertion sites |
| *HERV-R, ERV3* | *HERV3-int* | *HERV3* | 8426 | 26 |  | Catarrhini/Simian unclear by MLTree and no shared insertion sites, 0.545 divergent from *HERV15-int* |
| *HERV-Fb* | *HERVH48-int* | *HERVH48I* | 6559 | 32 |  | Catarrhini/Simian unclear by MLTree and one possible shared insertion site |
|  | *HERVIP10FH-int* | *HERVIP10FH* | 5102 | 54 |  | Catarrhini/Simian unclear by MLTree and no shared insertion sites, 0.255 divergent from *HERVIP10F-int* |
| *HERV-IP* | *HERVIP10F-int* | *HERVIP10F* | 7737 | 50 |  | Catarrhini/Simian unclear by MLTree and a few possible shared insertion sites, 0.255 divergent from *HERVIP10FH-int* |
|  | *ERV3-16A3_I-int* | *ERV3-16A3_I* | 5226 | 310 |  | Eutherian |
|  | *ERVL-B4-int* | *ERVL-B4* | 5714 | 242 |  | Eutherian |
|  | *ERVL-E-int* | *ERVL-E* | 5667 | 130 |  | Eutherian |
|  | *ERVL-int* | *ERVL* | 5764 | 35 |  | Eutherian |
| *HERV16* | *HERV16-int* | *HERV16* | 4996 | 24 |  | Eutherian |
|  | *HERVL40-int* | *HERVL_40* | 5530 | 27 |  | Eutherian |
|  | *HERVL74-int* | *HERVL74* | 5685 | 10 |  | Eutherian |
|  | *HUERS-P3b-int* | *HUERS-P3B* | 7418 | 39 |  | Eutherian probable |
|  | *LOR1-int* | *LOR1I* | 8120 | 43 |  | Eutherian |
|  | *LTR49-int* | *HERV49I* | 6331 | 49 | non-autonomous | Eutherian |
|  | *LTR52-int* | *HERV52I* | 3556 | 30 |  | Eutherian |
|  | *MER110-int* | *MER110I* | 4728 | 12 |  | Eutherian |
|  | *MER21-int* | *MER21I* | 4191 | 54 | non-autonomous | Eutherian |
|  | *MER31-int* | *MER31_I* | 4936 | 53 |  | Eutherian |
|  | *MER34B-int* | *MER34B_I* | 5356 | 9 | non-autonomous | Eutherian |
|  | *MER34-int* | *MER34-int* | 8207 | 8 |  | Eutherian |
|  | *MER4B-int* | *MER4BI* | 6758 | 43 |  | Eutherian probable |
| *HERV-FRD* | *MER50-int* | *MER50I* | 7205 | 31 |  | Eutherian |
|  | *MER51-int* | *MER51I* | 7816 | 16 |  | Eutherian probable |
|  | *MER52-int* | *MER52AI* | 7091 | 51 |  | Eutherian |
|  | *MER57A-int* | *MER57A_I* | 6187 | 71 | non-autonomous | Eutherian |
| *HERV-HS49C23* | *MER57-int* | *MER57I* | 7537 | 67 |  | Eutherian |
|  | *MER65-int* | *MER65I* | 4871 | 30 |  | Eutherian |
|  | *MER66-int* | *MER66_I* | 6676 | 48 |  | Eutherian |
|  | *MER68-int* | *HERVL68* | 3037 | 27 |  | Eutherian |
|  | *MER70-int* | *MER70_I* | 5023 | 29 |  | Eutherian |
|  | *MER76-int* | *MER76-int* | 6189 | 3 |  | Eutherian |
| *HERV-U4* | *MER83A-int* | *MER83AI* | 4285 | 10 |  | Eutherian probable |
|  | *MER83B-int* | *MER83BI* | 4880 | 13 |  | Eutherian |
|  | *MER89-int* | *MER89I* | 6801 | 14 |  | Eutherian |
| *HERV-F(c)1* | *HERV-Fc1-int* | *HERV-Fc1* | 4629 | 4 |  | Homininae probable by blastn and MLTree, clearly present in gorilla |
|  | *HERV4_I-int* | *HERV4_I* | 6539 | 24 |  | Simian confirmed by MLTree and insertion sites |
| *HERV-F* | *HERVFH19-int* | *HERVFH19I* | 7719 | 13 |  | Simian confirmed by MLTree and insertion sites |
| *HERV-I, HERV-FTD, FTD* | *HERVI-int* | *HERVI* | 7785 | 32 |  | Simian (late) probable by MLTree but no shared insertion sites |
| *HERV-K HML-5* | *HERVK22-int* | *HERVK22I* | 6823 | 56 |  | Simian (late) confirmed by MLTree and a few shared insertion sites |
| *HERV-S* | *HERVL18-int* | *HERV18* | 6053 | 48 |  | Simian confirmed by MLTree and insertion sites |
| *HERV-U3* | *HERVL66-int* | *HERVL66I* | 4329 | 15 |  | Simian confirmed by MLTree and insertion sites |
| *HERV-L* | *HERVL-int* | *HERVL* | 5654 | 585 |  | Simian confirmed by MLTree and insertion sites |
| *HERV-ADP* | *HERVP71A-int* | *HERVP71A_I* | 7590 | 28 |  | Simian confirmed by MLTree and insertion sites |
| *HuERS-P1* | *HUERS-P1-int* | *HUERS-P1* | 6263 | 55 | probably non-autonomous | Simian confirmed by MLTree and insertion sites, 0.315 divergent from *HERV35I-int* |
| *HuERS-P2* | *HUERS-P2-int* | *HUERS-P2* | 3088 | 62 | non-autonomous | Simian confirmed by MLTree and insertion sites. 0.407 divergent from *MER52-int* |
| *HERV-P, HuERS-P3* | *HUERS-P3-int* | *HUERS-P3* | 8919 | 42 |  | Simian confirmed by MLTree and insertion sites |
|  | *LTR19-int* | *HERV19I* | 5586 | 18 | non-autonomous | Simian confirmed by MLTree and insertion sites, 0.201 divergent from *PABL_A-int* |
|  | *LTR43-int* | *LTR43_I* | 4798 | 5 |  | Simian confirmed by MLTree and insertion sites |
| *HERV-Fc* | *LTR46-int* | *HERV46I* | 6985 | 12 |  | Simian confirmed by MLTree and insertion sites |
|  | *MER41-int* | *MER41I* | 3944 | 231 | probably non-autonomous | Simian confirmed by MLTree and insertion sites |
|  | *MER84-int* | *MER84I* | 4954 | 11 |  | Simian confirmed by MLTree and insertion sites |
|  | *PABL_A-int* | *PABL_AI* | 5015 | 42 | non-autonomous | Simian confirmed by MLTree and insertion sites, 0.201 divergent from *LTR19-int* |
| *HERV-R(b) and HERV-Rb* | *PABL_B-int* | *PABL_BI* | 7122 | 20 |  | Simian confirmed by MLTree and insertion sites |
|  | *PRIMA41-int* | *PRIMA41* | 7756 | 28 |  | Simian confirmed by MLTree and insertion sites |
|  | *PRIMA4-int* | *PRIMA4_I* | 8270 | 11 |  | Simian confirmed by MLTree and insertion sites |
|  |  |  |  |  |  |  |
| Element autonomy is based both on RepBase annotations and our analysis of the presence of putative capsid and pol genes in the consensus element. | | | | | | |
| The four element types labeled "Catarrhini/Simian unclear" correspond to the four elements given as ambiguous in Figure 3 and the main text. | | | | | | |
| "Catarrhini confirmed" are element types that have no closely-related sequences outside of Catarrhini, and that were confirmed by our analysis. "Simian confirmed" and "Basal Primate confirmed" are analogous. | | | | | | |
| "Catarrhini robust by MLTree and insertion sites" are element types with closely-related sequences present in the marmoset genome. In these cases, sequence trees and insertion site analysis indicate that these marmoset sequences arose from an independent event, presumably from genome invasion by a related retrovirus (see Supplemental Methods). An example tree (*HERV17*) is shown in the left panel of Figure S4. An example of lack of shared sites (*HERVS71*) between Catarrhini and marmoset is given in Table S6. Analysis of all cases was completed at the same level of detail and is available on request. | | | | | | |
| Eutherian elements are not analyzed in the paper but are included here for completeness. | | | | | | |
| For Primate specific closely-related families, the nucleotide divergence of a given family from its most closely related family is given (based on their consensus sequences). Nucleotide divergence was calculated using phyml (HKY rate matrix, 4 rate classes, ts/tv estimated). | | | | | | |
