# Supplementary material for: 近世史部会--笹本正治「近世の鋳物師と真継家」,塚田孝「三都の非人と非人集団」 (1984年度歴史学研究会大会報告批判)
Source: HighWire-hosted journal article supplement (doi:10.1101/gr.121749.111), 1984-12-01
Supplement: Table_S5.docx [file Table_S5.docx]

**Table S5. Summary of human ZNF gene origins.**

| human gene name and coordinates (hg18) | ZF domains | other domains | human chr cluster | branch added | chimpanzee | orangutan | macaque | baboon | marmoset | basal Primate | non-Primate | human gene status (transcript support, Gencode status, other notes) | other notes |
| --- | --- | --- | --- | --- | --- | --- | --- | --- | --- | --- | --- | --- | --- |
| hsap|1:23562302-23561052|ZNF436 | 12 | K | solo |  | present | present | present | present | present | present | present | well validated |  |
| hsap|1:40700676-40701845|ZNF643 | 9 | SK | 1.1 |  | present | present | present | present | present | present | present | partially validated |  |
| hsap|1:40733176-40734315|ZNF642 | 9 | K | 1.1 |  | present | present | present | present | present | present | present | well validated |  |
| hsap|1:40784820-40785716|ZNF684 | 8 | K | solo |  | present | present | present | present | present | present | present | well validated |  |
| hsap|1:43089208-43090068|ZNF691 | 7 | none | solo |  | present | present | present | present | present | present | present | well validated |  |
| hsap|1:119968263-119966854|ZNF697 | 11 | none | solo |  | present | present | present | present | present | present | present | partially validated |  |
| hsap|1:180293768-180292065|ZNF648 | 9 | none | solo |  | present | present | present | present | present | present | present | validated |  |
| hsap|1:225908623-225910149|ZNF678 | 14 | K | solo | Catarrhine | present | present | present | present | absent inc TA | absent | absent | validated |  |
| hsap|1:225951214-225961014|ZNF847P pseudogene | NA | K |  |  |  |  |  |  |  |  |  | Gencode manual pseudogene |  |
| hsap|1:245218181-245216895|ZNF695 | 9 | K | 1.2 | Catarrhine | present | present | present | present hand-assembled | absent inc TA | absent | absent | validated |  |
| hsap|1:245268354-245267377|ZNF670 | 8 | K | 1.2 | Basal | present | present | present | present | present | present | absent | well validated |  |
| hsap|1:245331246-245330302|ZNF669 | 9 | K | 1.2 | Simian | present | present hand-assembled | present | present hand-assembled | present | absent | absent | well validated |  |
| hsap|1:245387393-245386494|ZNF124 | 9 | K | 1.2 | Simian | present | present | present | present | present | absent | absent | validated |  |
| hsap|1:245420940-245419906|LLNL1120 | 7 | K | 1.2 | Basal | present | present | present | present | present | prob present | absent | Havana_unprocessed_pseudogene but some transcripts and present ancestrally |  |
| hsap|1:245531202-245530447|ZNF496 | 3 | SK | 1.2 |  | present | present | present | present | present | present | present | well validated |  |
| hsap|1:247108097-247109452|ZNF672 | 12 | none | solo |  | present | present | present | present | present | present | present | validated |  |
| hsap|2:95179740-95178757|ZNF514 | 7 | K | 2.1 |  | present | present | present | present | present | present | present | well validated |  |
| hsap|2:95210574-95211578|ZNF2 | 8 | K | 2.1 |  | present | present | present | present | present | present | present | well validated |  |
| hsap|2:132777829-132797779|AK094599 pseudogene | NA | K |  |  |  |  |  |  |  |  |  | Gencode manual pseudogene |  |
| hsap|3:32005576-32007471|ZNF860 | 12 | K | solo | Catarrhine | present | absent inc TA | present | present hand-assembled | prob absent inc TA | absent | absent | validated | single coding exon with KRAB and ZF (possible retrogene) |
| hsap|3:40503300-40504733|ZNF619 | 10 | K | 3.1 |  | present | present | present | present | present | present | present | validated |  |
| hsap|3:40532354-40533355|ZNF620 | 8 | K | 3.1 |  | present | present | present | present | present | present | present | well validated |  |
| hsap|3:40548524-40549582|ZNF621 | 7 | K | 3.1 |  | present | present | present | present | present | present | present | well validated |  |
| hsap|3:42930822-42931847|ZNF662 | 8 | K | solo |  | present | present | present | present | present | present | present | validated |  |
| hsap|3:44465236-44463074|ZNF445 | 14 | SK | 3.2 |  | present | present | present | present | present | present | present | well validated |  |
| hsap|3:44517134-44515794|ZNF852 | 12 | K | 3.2 |  |  |  |  |  |  |  |  | validated, named ZNF852 by GENCODE | ZNF167 and ZNF852 are very similar |
| hsap|3:44586417-44587868|ZNF167 | 13 | SK | 3.2 |  |  |  |  |  |  |  |  | well validated | ZNF167 and ZNF852 are very similar |
| hsap|3:44610690-44611682|ZNF660 | 10 | none | 3.2 |  | present | present | present | present | present | present | present | validated, no KRAB in genome |  |
| hsap|3:44658395-44660713|ZNF197 | 22 | SK | 3.2 |  | present | present | present | present | present | present | present | well validated |  |
| hsap|3:44675196-44676440|ZNF35 | 11 | none | 3.2 |  | present | present | present | present | present | present | present | well validated |  |
| hsap|3:44737368-44738945|ZNF502 | 14 | none | 3.2 |  | present | present hand-assembled | present | present | present | present | present | well validated |  |
| hsap|3:44750918-44751730|ZNF501 | 9 | none | 3.2 |  | present | present | present | present | present | present | present | well validated |  |
| hsap|3:48284408-48285277|ZNF589 | 4 | K | solo | Simian | present | present | present | present | present | absent | absent | validated |  |
| hsap|3:75871190-75868722|ZNF717 | 18 | K | solo | Hominoid/Hominid | present hand-assembled | present | absent inc TA and syntenic DNA | absent inc TA | absent inc TA | absent | absent | partially validated |  |
| hsap|3:115438842-115437793|ZNF80 | 5 | cK | solo |  | present | present | present | present hand-assembled | present | present | present | validated, upstream KRAB not in gene model but present ancestrally |  |
| hsap|2:132783352-132792779|ZNF806 pseudogene | NA | K |  |  |  |  |  |  |  |  |  | Gencode manual annotation pseudogene | aka AK094599 |
| hsap|4:76103-77314|ZNF595 | 14 | K | 4.1 | Simian | present | present | present | present | present | absent | absent | well validated | aka ZNF732 |
| hsap|4:144701-145909|ZNF718 | 10 | K | 4.1 | Simian | present | present | present hand-assembled | prob present | present | absent | absent | some validation, probable alternative ZF exon for upstream ZNF595 exons |  |
| hsap|4:196389-239771|ZNF876P pseudogene | NA | cK | 4.1 |  |  |  |  |  |  |  |  | Gencode automated and RefSeq pseudogene |  |
| hsap|4:256420-254891|LOC654254 | 9 | K | 4.1 | Catarrhine | present | present | present | present hand-assembled | absent inc TA | absent | absent | weakly validated, recently named ZNF732 by RefSeq |  |
| hsap|4:356452-357648|ZNF141 | 10 | K | 4.1 | Simian | present | present | present | present hand-assembled | present | absent | absent | well validated |  |
| hsap|4:428222-425487|ZNF721 | 23 | K | 4.1 | Catarrhine | present | present | present | present hand-assembled | absent inc TA | absent | absent | well validated |  |
| hsap|5:23562098-23563636|PRDM9|12 distinct type | NA | SETK | solo |  |  |  |  |  |  |  |  | well validated gene but unique evolutionary properties, analyzed elsewhere |  |
| hsap|5:150256723-150255182|ZNF300 | 12 | K | 5.1 |  | present | present | present | present | present | present | present | well validated |  |
| hsap|5:150291891-150291052|LLNL1019 | 4 | K | 5.1 |  | present | present | absent inc TA and syntenic DNA | absent inc TA | absent inc TA | present | present | validation unclear, ZF region may not be in-frame, possible pseudogene but present ancestrally |  |
| hsap|5:178073229-178071670|ZNF354A | 13 | K | 5.2 |  |  |  |  |  |  |  |  | well validated | ZNF354A and B are very similar |
| hsap|5:178242315-178243895|ZNF354B | 13 | K | 5.2 |  |  |  |  |  |  |  |  | well validated | ZNF354A and B are very similar |
| hsap|5:178290843-178292303|ZFP2 | 13 | K | 5.2 |  | present | present | present | present | present | present | present | validated, upstream KRAB out of frame in some transcripts |  |
| hsap|5:178324261-178325577|ZNF454 | 12 | K | 5.2 |  | present | present | present | present | present | present | present | well validated |  |
| hsap|5:178391808-178393244|LLNL1080 | 13 | K | 5.2 |  | present | present | present | present | present | present | present | validated by multiple ESTs, recently named ZNF879 |  |
| hsap|5:178438286-178439701|ZNF354C | 11 | K | 5.2 |  | present | present | present | present | present | present | present | well validated |  |
| hsap|5:180210920-180209010|ZFP62 | 20 | none | solo |  | present | present | present | present | present | present | present | validated |  |
| hsap|6:26746760-26745555|ZNF322A | 8 | none | solo |  |  |  |  |  |  |  |  | well validated | ZNF322A and ZNF322B are extremely similar |
| hsap|6:27433582-27451132|ZNF204P pseudogene | NA | cK | 6.1 |  |  |  |  |  |  |  |  | Gencode manual and RefSeq pseudogene |  |
| hsap|6:27476129-27477202|ZNF391 | 9 | none | 6.1 |  | present | present | present | present | present | present | present | well validated |  |
| hsap|6:27529019-27527064|ZNF184 | 19 | K | 6.1 |  | present | present | present | present | present | present | present | well validated |  |
| hsap|6:28164319-28165224|ZNF165 | 5 | S | 6.2 |  | present | present | present | present | present | present | present | well validated |  |
| hsap|6:28166908-28171471|ZSCAN12P1 pseudogene | NA | S | 6.2 |  |  |  |  |  |  |  |  | Gencode manual and RefSeq pseudogene | aka ZSCAN12L1 |
| hsap|6:28205186-28205704|ZSCAN16 | 4 | S | 6.2 |  | present | present | present | present | present | present | present | validated |  |
| hsap|6:28228812-28229771|ZNF192 | 9 | SK | 6.2 |  | present | present | present | present | present | present | present | well validated |  |
| hsap|6:28308318-28308932|ZNF193 | 5 | S | 6.2 |  | present | present | present | present | present | present | present | well validated |  |
| hsap|6:28321733-28320876|ZKSCAN4 | 7 | SK | 6.2 |  |  |  |  |  |  |  |  | well validated | ZKSCAN3 and 4 are very similar |
| hsap|6:28351950-28352849|ZNF187 | 7 | S | 6.2 |  | present | present | present | present | present | present | present | validation complex, annotated by Gencode as pseudogene but present ancestrally |  |
| hsap|6:28402611-28401925|ZNF323 | 6 | S | 6.2 |  | present | present | present | present | present | present | present | well validated |  |
| hsap|6:28441181-28442038|ZKSCAN3 | 7 | SK | 6.2 |  |  |  |  |  |  |  |  | well validated | ZKSCAN3 and 4 are very similar |
| hsap|6:28467499-28466351|ZSCAN12 | 9 | S | 6.2 |  | present | present | present | present | present | present | present | validated |  |
| hsap|6:28510835-28510224|ZSCAN23 | 5 | S | 6.2 |  | present | present | present | present | present | present | present | validated |  |
| hsap|6:29072343-29070760|ZNF311 | 13 | K | solo |  | present | present | present | present | present | present | present | validated |  |
| hsap|6:29749515-29748259|ZFP57 | 6 | K | solo |  | present | present | present | present | present | present | present | validated |  |
| hsap|7:5069851-5071755|RBAK | 14 | K | solo |  | present | present | present | present | present | present | present | well validated |  |
| hsap|7:6658344-6660764|LLNL1089 | 14 | K | 7.1 |  | present | present | present | present | present | present | present | validation unclear, possible pseudogene but present ancestrally |  |
| hsap|7:6698860-6697007|ZNF12 | 15 | K | 7.1 |  | present | present | present | present | present | present | present | well validated |  |
| hsap|7:55974168-55975190|ZNF713 | 5 | K | solo |  | present | present | present | present | present | present | present | validated |  |
| hsap|7:57192802-57191492|ZNF479 | 11 | K | 7.2 |  |  |  |  |  |  |  |  | validated | ZNF479 and ZNF734 are very similar |
| hsap|7:57532371-57533594|ZNF716 | 9 | K | 7.2 | Hominoid/Hominid | present | present | absent inc TA and syntenic DNA | absent inc TA | absent inc TA | absent | absent | validated |  |
| hsap|7:62389105-62401869|LOC643955 pseudogene | NA | K |  |  |  |  |  |  |  |  |  | Gencode manual and RefSeq pseudogene |  |
| hsap|7:62553340-62554503|ZNF734 | 11 | K | 7.3 |  |  |  |  |  |  |  |  | validated | ZNF479 and ZNF734 are very similar |
| hsap|7:63112915-63113730|LLNL1095 | 6 | K | 7.3 | Catarrhine | present | present | prob present | prob present hand-assembled | absent inc TA | absent | absent | Havana_unprocessed_pseudogene but present ancestrally |  |
| hsap|7:63175061-63176359|ZNF727 | 10 | K | 7.3 | Hominoid/Hominid | present | present | absent inc TA and syntenic DNA | prob absent TA done | absent TA done | absent | absent | weakly supported by EST but Gencode annotates as pseudogene, present ancestrally | macaque absence confirmed by synteny |
| hsap|7:63317168-63318100|ZNF735 | 6 | K | 7.3 | Catarrhine | present hand-assembled | present | present | absent inc TA | absent inc TA | absent | absent | Gencode manual pseudogene, RefSeq gives tentative gene but no transcript or EST support, present ancestrally |  |
| hsap|7:63363708-63364679|ZNF679 | 7 | K | 7.3 | Catarrhine | present | present | present | present | absent inc TA | absent | absent | validated |  |
| hsap|7:63445977-63446957|ZNF736 | 9 | K | 7.3 | Simian | present hand-assembled | present | present | present | present | absent | absent | validated |  |
| hsap|7:63620314-63618977|ZNF680 | 12 | K | 7.3 | Simian | present | present | present | present | present | absent | absent | well validated |  |
| hsap|7:63804136-63806466|ZNF107 | 16 | K | 7.3 | Simian | present | present | present | present | present | absent | absent | validated, KRAB domain out of frame in some transcripts but present ancestrally | aka ZNF588 |
| hsap|7:63929260-63930012|ZNF138 | 2 | K | 7.3 | Catarrhine | absent inc TA and syntenic DNA | present | present | present | absent inc TA | absent | absent | well validated, KRAB missing from Ensembl gene model, only 2 canonical ZF |  |
| hsap|7:64025466-64026848|ZNF273 | 10 | K | 7.3 | Simian | present | present | present | present | present | absent | absent | well validated |  |
| hsap|7:64077350-64075935|ZNF117 | 10 | K | 7.3 | Catarrhine | present | present | present hand-assembled | present hand-assembled | absent inc TA | absent | absent | validated, KRAB domain out of frame in some transcripts |  |
| hsap|7:64500688-64502220|ZNF92 | 11 | K | 7.3 | Simian | present | present | present | present hand-assembled | present | absent | absent | well validated |  |
| hsap|7:98922034-98923044|ZNF789 | 8 | K | 7.4 |  | present | present | present | present | present | present | present | well validated |  |
| hsap|7:98930188-98929091|ZNF394 | 6 | SK | 7.4 |  | present | present | present | present | present | present | present | well validated |  |
| hsap|7:98966669-98967805|ZKSCAN5 | 8 | SK | 7.4 |  | present | present | present | present | present | present | present | well validated but ZF in two exons, second ZF exon tracked for orthology | aka ZFP95 |
| hsap|7:99007800-99009140|ZNF655 | 6 | cK | 7.4 |  | present | present | present | present | present | present | present | well validated, KRAB domain not found in ZF containing transcripts but present ancestrally |  |
| hsap|7:99064749-99065576|ZNF498 | 5 | S | 7.4 |  | present | present | present | present | present | present | present | well validated, SCAN only |  |
| hsap|7:99468863-99469753|ZKSCAN1 | 6 | SK | 7.5 |  | present | present | present | present | present | present | present | well validated |  |
| hsap|7:99499346-99500173|ZSCAN21 | 6 | S | 7.5 |  | present | present | present | present | present | present | present | well validated |  |
| hsap|7:99507772-99506705|ZNF3 | 8 | K | 7.5 |  | present | present | present | present | present | present | present | well validated |  |
| hsap|7:148400499-148398451|ZNF786 | 13 | K | 7.6 |  | present | present | present | present | present | present | present | well validated |  |
| hsap|7:148433592-148431640|ZNF425 | 19 | K | 7.6 |  | present | present | present | present | present | present | present | well validated |  |
| hsap|7:148506672-148507823|ZNF398 | 6 | K | 7.6 |  | present | present | present | present | present | present | present | well validated |  |
| hsap|7:148551839-148552669|ZNF282 | 5 | K | 7.6 |  | present | present | present | present | present | present | present | validated |  |
| hsap|7:148581582-148582436|ZNF212 | 4 | K | 7.6 |  | present | present | present | present | present | present | present | well validated |  |
| hsap|7:148609528-148610364|ZNF783 | 4 | K | 7.6 |  | present | present | present | present | present | present | present | weakly validated, confusing, but present ancestrally |  |
| hsap|7:148760957-148759803|ZNF777 | 9 | K | 7.6 |  | present | present | present | present | present | present | present | well validated |  |
| hsap|7:148803505-148802411|ZNF746 | 3 | K | 7.6 |  | present | present | present | present | present | present | present | well validated |  |
| hsap|7:148875178-148952814|ZNF767 no canonical ZF | NA | K | 7.6 |  |  |  |  |  |  |  |  | unclear validation, does not have canonical C2H2 ZFs despite name |  |
| hsap|7:149094265-149092739|ZNF467 | 12 | none | 7.6 |  | present | present | present | present | present | present | present | validated |  |
| hsap|7:149166442-149195501|ZNF862 no canonical ZF | NA | KK | 7.6 |  |  |  |  |  |  |  |  | unclear validation, does not have canonical C2H2 ZFs despite name |  |
| hsap|7:149699264-149700964|REPIN1 | 13 | none | 7.7 |  | present | present | present | present | present | present | present | well validated |  |
| hsap|7:149724533-149726113|ZNF775 | 11 | none | 7.7 |  | present | present | present | present | present | present | present | well validated |  |
| hsap|8:7203492-7202911|ZNF705G | 2 | K | solo |  |  |  |  |  |  |  |  | partially validated | ZNF705A D E and G are extremely similar |
| hsap|8:185154-186359|ZNF596 | 11 | K | solo |  | present | present | present | present | present | present | present | well validated |  |
| hsap|8:12007492-12008073|ZNF705D | 3 | K | solo |  |  |  |  |  |  |  |  | validated | ZNF705A D E and G are extremely similar |
| hsap|8:126057770-126059278|ZNF572 | 12 | none | solo |  | present | present | present | present | present | present | present | well validated |  |
| hsap|8:144429441-144430346|GLI4 | 7 | none | 8.1 |  | present | present | present | present | present | present | present | well validated |  |
| hsap|8:144449284-144450336|ZNF696 | 9 | none | 8.1 |  | present | present | present | present | present | present | present | well validated |  |
| hsap|8:144803186-144804793|ZNF623 | 13 | none | 8.2 |  | present | present | present | present | present | present | present | well validated |  |
| hsap|8:144847828-144848685|ZNF707 | 7 | K | 8.2 |  | present | present | present | present | prob present | present | present | well validated |  |
| hsap|8:145919577-145917841|ZNF251 | 12 | K | 8.3 |  | present | present | present | present | present | present | present | partially validated |  |
| hsap|8:145970795-145969458|ZNF34 | 12 | K | 8.3 |  | present | present | present | present | present | present | present | validated |  |
| hsap|8:146003379-146004581|ZNF517 | 9 | K | 8.3 |  | present | present | present | present | present | present | present | validated |  |
| hsap|8:146037543-146039354|ZNF7 | 14 | K | 8.3 |  | present | present | present | present | present | present | present | well validated |  |
| hsap|8:146079026-146077707|ZNF250 | 13 | K | 8.3 |  | present | present | present | present | present | present | present | well validated |  |
| hsap|8:146128781-146126931|ZNF16 | 15 | none | 8.3 |  | present | present | present | present | present | present | present | well validated |  |
| hsap|8:146174714-146173332|ZNF252 | 8 | K | 8.3 |  | present | present | present | present | absent inc TA | present | present | validated but exact structure not clear | aka LLNL676 |
| hsap|9:40765037-40762098|ZNF658 | 18 | K | solo |  |  |  |  |  |  |  |  | well validated | ZNF658 and ZNF658B2 are nearly identical |
| hsap|9:41581963-41579519|ZNF658B2 | 18 | K | solo |  |  |  |  |  |  |  |  | validated but exact structure not clear, KRAB domain present in genome and LLNL gene model | ZNF658 and ZNF658B2 are nearly identical |
| hsap|9:94650655-94648334|ZNF484 | 15 | K | solo |  | present | present | present | present | present | present | present | well validated |  |
| hsap|9:96101917-96103470|ZNF169 | 11 | K | solo |  | present | present | present | present | absent inc TA | present | present | well validated |  |
| hsap|9:98562578-98560884|ZNF510 | 9 | K | 9.1 |  | present | present | present | present | present | present | present | well validated |  |
| hsap|9:98621882-98620029|ZNF782 | 11 | K | 9.1 |  | present | present | present | present | present | present | present | validated |  |
| hsap|9:99001614-99000409|ZNF322B | 8 | none | solo |  |  |  |  |  |  |  |  | validated | ZNF322A and ZNF322B are extremely similar |
| hsap|9:103210031-103211749|ZNF189 | 16 | K | solo |  | present | present | present | present | present | present | present | well validated |  |
| hsap|9:113343754-113345268|ZNF483 | 11 | SK | solo |  | present | present | present | present | present | present | present | well validated |  |
| hsap|9:114846367-114844829|ZFP37 | 12 | K | solo |  | present | present | present | present | present | present | present | well validated |  |
| hsap|9:129246128-129247294|ZNF79 | 11 | K | solo |  | present | present | present | present | present | present | present | well validated |  |
| hsap|10:38162051-38160552|ZNF248 | 7 | K | 10.1 |  | present | present | present | present | present | present | present | well validated |  |
| hsap|10:38223571-38225600|ENSG00000217552 pseudogene | NA | K | 10.1 |  |  |  |  |  |  |  |  | Gencode manual and ENSEMBL pseudogene |  |
| hsap|10:38282134-38281064|ZNF25 | 12 | K | 10.1 |  | present | present | present | present hand-assembled | present | present | present | well validated |  |
| hsap|10:38383311-38385491|ZNF33A | 16 | K | 10.1 | Catarrhine | present | present | present | present hand-assembled | absent inc TA | absent | absent | well validated |  |
| hsap|10:38446323-38447768|ZNF37A | 10 | K | 10.1 |  | present | present | present | present | present | present | present | well validated |  |
| hsap|10:42147320-42183499|LOC441666 pseudogene | NA | K | 10.2 |  |  |  |  |  |  |  |  | Gencode manual and RefSeq pseudogene |  |
| hsap|10:42328969-42368286|ZNF37B pseudogene | NA | K | 10.2 |  |  |  |  |  |  |  |  | Gencode manual and RefSeq pseudogene |  |
| hsap|10:42410154-42408070|ZNF33B | 16 | K | 10.2 |  | present | present | present | present | present | present | present | well validated |  |
| hsap|10:43252580-43298013|ZNF487 no ZF in coding region | NA | none | 10.3 |  |  |  |  |  |  |  |  | ZF in genome but not in-frame in gene models |  |
| hsap|10:43373533-43372160|ZNF239 | 9 | cK | 10.3 |  | present | present | present | present | present | present | present | validated, genomic KRAB out of frame in gene models |  |
| hsap|10:43431744-43432820|ZNF485 | 11 | K | 10.3 |  | present | present | present | present | present | absent | present | well validated |  |
| hsap|10:43460253-43459507|ZNF32 | 6 | none | 10.3 |  | present | present | present | present | present | present | present | well validated, no KRAB in genome |  |
| hsap|11:3338372-3336927|ZNF195 | 9 | K | solo | Simian | present | present | present | present | present | absent | absent | well validated |  |
| hsap|11:6933496-6934329|ZNF215 | 4 | SK | 11.1 |  | present | present | present | present | present | present | present | validated |  |
| hsap|11:6979363-6977672|ZNF214 | 10 | K | 11.1 |  | present | present | present | present | present | present | present | well validated |  |
| hsap|11:46682478-46683986|ZNF408 | 10 | none | solo |  | present | present | present | present | present | present | present | well validated |  |
| hsap|11:71205790-71205209|ZNF705E | 2 | K | solo |  |  |  |  |  |  |  |  | unvalidated but so similar to ZNF705A that unclear transcript mapping | ZNF705A D E and G are extremely similar |
| hsap|11:123102913-123101918|ZNF202 | 8 | SK | solo |  | present | present | present | present | present | present | present | well validated |  |
| hsap|12:8220862-8221443|ZNF705A | 3 | K | solo |  |  |  |  |  |  |  |  | well validated | ZNF705A D E and G are extremely similar |
| hsap|12:47023772-47023026|ZNF641 | 5 | K | solo |  | present | present | present | present | present | present | present | well validated |  |
| hsap|12:123062645-123063427|ZNF664 | 9 | none | solo |  | present | present | present | present | present | present | present | validated |  |
| hsap|12:132013822-132012035|ZNF605 | 17 | K | 12.1 |  | present | present | present | present | present | present | present | well validated |  |
| hsap|12:132096794-132098137|ZNF26 | 13 | K | 12.1 |  | present | present | present | present | present | present | present | well validated |  |
| hsap|12:132143612-132145588|ZNF84 | 19 | K | 12.1 |  | present | present | present | present | present | present | present | well validated |  |
| hsap|12:132192165-132193307|ZNF140 | 10 | K | 12.1 |  | present | present | present | present | present | present | present | well validated |  |
| hsap|12:132208577-132206946|LLNL973 | 7 | K | 12.1 |  | present | present | present | present | present | present | present | unvalidated, possible retrogene, but conserved deeply |  |
| hsap|12:132242161-132243624|ZNF10 | 10 | K | 12.1 |  | present | present | present | present | present | present | present | validated |  |
| hsap|12:132288805-132289533|ZNF268 | 4 | K | 12.1 |  | present | present | present | present | present | present | present | well validated |  |
| hsap|14:21063629-21060681|SALL2 | 6 | none | solo |  | present | present | present | present | present | present | present | well validated |  |
| hsap|15:33062927-33060855|ZNF770 | 10 | none | solo |  | present | present | present | present | present | present | present | well validated |  |
| hsap|15:41441432-41440566|ZSCAN29 | 6 | S | solo |  | present | present | present | present | present | present | present | validated |  |
| hsap|15:88704278-88705516|ZNF774 | 12 | none | solo |  | present | present | present | present | present | present | present | validated |  |
| hsap|16:3080649-3079096|ZSCAN10 | 13 | S | 16.1 |  | present | present | present | present | present | present | present | well validated |  |
| hsap|16:3109257-3110324|ZNF205 | 8 | K | 16.1 |  | present | present | present | present | present | present | present | well validated |  |
| hsap|16:3130690-3131346|ZNF213 | 5 | SK | 16.1 |  | present | present | present | present | present | present | present | well validated |  |
| hsap|16:3214615-3213896|ZNF200 | 5 | none | 16.1 |  | present | present | present | present | present | present | present | well validated |  |
| hsap|16:3279390-3280556|ZNF263 | 9 | SK | 16.1 |  | present | present | present | present | present | present | present | well validated |  |
| hsap|16:3307184-3307867|ZNF75A | 5 | cSK | 16.1 |  |  |  |  |  |  |  |  | validated | ZNF75A and ZNF75D are very similar |
| hsap|16:3373713-3372856|ZNF434 | 6 | S | 16.1 |  | present | present hand-assembled | present | present | present | present | present | well validated |  |
| hsap|16:3398321-3398917|ZNF174 | 3 | S | 16.1 |  | present | present | present | present | present | present | present | validated |  |
| hsap|16:3427540-3426428|ZNF597 | 7 | K | 16.1 |  | present | present | present | present | present | present | present | well validated |  |
| hsap|16:4743061-4742381|ZNF500 | 5 | SK | solo |  | present | present | present | present | present | present | present | validated |  |
| hsap|16:25159561-25158641|ZKSCAN2 | 6 | SK | solo |  | present | present | present | present | present | present | present | well validated |  |
| hsap|16:30316151-30317926|ZNF48 | 12 | none | 16.2 |  | present | present | present | present | present | present | present | well validated |  |
| hsap|16:30336377-30337186|ZNF771 | 8 | none | 16.2 |  | present | present | present | present | present | absent | present | well validated |  |
| hsap|16:30444874-30443342|ZNF768 | 10 | none | 16.2 |  | present | present | present | present | present | present | present | well validated |  |
| hsap|16:30451974-30451324|ZNF747 | 4 | K | 16.2 | Simian | present | present | present | present | present | absent | absent | validated, canonical gene model has stop before all ZF domains but present ancestrally |  |
| hsap|16:30474933-30474019|ZNF764 | 7 | K | 16.2 |  | present | present | present | present | present | present | present | well validated |  |
| hsap|16:30489259-30488741|ZNF688 | 2 | K | 16.2 |  | present | present | present | present | present | present | present | well validated |  |
| hsap|16:30502266-30501385|ZNF785 | 7 | K | 16.2 |  | present | present | absent inc TA and syntenic DNA | absent inc TA | present | present | present | well validated |  |
| hsap|16:30524267-30523089|ZNF689 | 10 | K | 16.2 |  | present | present | present | present | present | present | present | well validated |  |
| hsap|16:30703077-30700543|ZNF629 | 19 | none | solo |  | present | present | present | present | present | present | present | validated |  |
| hsap|16:30981104-30979899|ZNF668 | 10 | none | 16.3 |  | present | present | present | present | present | present | present | well validated, ZF domains on two exons, second ZF exon tracked for orthology |  |
| hsap|16:30995147-31000525|ZNF646 | 28 | none | 16.3 |  | present | present | present | present | present | present | present | validated, no KRAB in genome |  |
| hsap|16:31673276-31674538|ZNF720 | 11 | K | 16.4 | Simian | present | present | present | present | present | absent | absent | partially validated, most transcripts don't have ZF in frame but present ancestrally |  |
| hsap|16:31834122-31835300|ZNF267 | 13 | K | 16.4 | Simian | present | present | present | present | present | absent | absent | well validated |  |
| hsap|16:49733558-49730097|SALL1 | 8 | none | solo |  | present | present | present | present | present | present | present | well validated |  |
| hsap|16:56589670-56587925|ZNF319 | 11 | none | solo |  | present | present | present | present | present | present | present | validated |  |
| hsap|16:67154447-67156099|ZFP90 | 13 | K | solo |  | present | present | present | present | present | present | present | well validated |  |
| hsap|16:70041290-70039500|ZNF23 | 16 | K | 16.5 |  | present | present | present | present | present | present | present | well validated |  |
| hsap|16:70067677-70066577|ZNF19 | 9 | K | 16.5 |  | present | present | present | present | present | present | present | well validated |  |
| hsap|16:73760651-73761730|ZFP1 | 8 | K | solo |  | present | present | present | present | present | present | present | well validated |  |
| hsap|16:87820603-87822468|ZNF778 | 13 | K | solo | Basal | present | present | present | present | present | prob present | absent | validated |  |
| hsap|17:4935524-4937029|ZFP3 | 13 | none | 17.1 |  | present | present | present | present | present | present | present | well validated |  |
| hsap|17:4950553-4949846|ZNF232 | 5 | S | 17.1 |  | present | present | present | present | present | present | present | well validated |  |
| hsap|17:5028275-5025855|ZNF594 | 21 | none | 17.1 |  | present | present | present | present hand-assembled | present | present | present | validated | old gene but not found in many species |
| hsap|17:11822787-11822002|ZNF18 | 5 | SK | solo |  | present | present | present | present | present | present | present | well validated |  |
| hsap|17:15560094-15561326|ZNF286A | 10 | K | solo |  |  |  |  |  |  |  |  | well validated | ZNF286A and ZNF286B are exremely similar |
| hsap|17:16397466-16395898|ZNF287 | 14 | SK | 17.2 |  | present | present | present | present | present | present | present | validated |  |
| hsap|17:16468552-16466330|ZNF624 | 20 | K | 17.2 |  | present | present | present | present hand-assembled | present | present | present | validated |  |
| hsap|17:18507402-18505978|ZNF286B | 10 | none | solo |  |  |  |  |  |  |  |  | weakly validated | ZNF286A and ZNF286B are exremely similar |
| hsap|18:14096409-14094919|ZNF519 | 9 | K | solo | Hominoid/Hominid | present | present | absent inc TA and syntenic DNA | absent inc TA | absent inc TA | absent | absent | validated |  |
| hsap|18:31079220-31080269|ZNF397 | 9 | S | 18.1 |  | present | present | present | present | present | present | present | validated |  |
| hsap|18:31088344-31087415|ZNF397OS | 7 | S | 18.1 |  | present | absent inc TA | present | present | present | present | present | validated |  |
| hsap|18:31140587-31141855|ZNF271 | 5 | none | 18.1 |  | present | present | present | present | present | present | present | well validated |  |
| hsap|18:31171733-31171197|ZNF24 | 4 | S | 18.1 |  | present | present | present | present | present | present | present | well validated |  |
| hsap|18:31203623-31203180|ZNF396 | 3 | S | 18.1 |  | present | present | present | present | present | present | present | validated |  |
| hsap|18:74853061-74856453|SALL3 | 8 | none | solo |  | present | present | present | present | present | present | present | weakly validated |  |
| hsap|19:2784675-2785847|ZNF554 | 7 | K | 19.1 |  | present | present | present | present | present | present | present | well validated |  |
| hsap|19:2803376-2804947|ZNF555 | 15 | K | 19.1 |  | present | present | present | present | present | present | present | well validated |  |
| hsap|19:2828269-2829324|ZNF556 | 9 | K | 19.1 |  | present | present | present | present | absent inc TA | present | present | validated |  |
| hsap|19:2867920-2869284|ZNF57 | 13 | K | 19.1 | Catarrhine | present | present | present | present | absent inc TA | absent | absent | well validated |  |
| hsap|19:2885815-2884490|ZNF77 | 12 | K | 19.1 | Basal | present | present | present | present | present | present | prob absent | well validated |  |
| hsap|19:7033889-7034752|ZNF557 | 10 | K | solo | Catarrhine | present | present | present | present | absent inc TA | absent | absent | well validated |  |
| hsap|19:7490129-7491832|ZNF358 | 9 | none | solo |  | present | present | present | present | present | present | present | validated |  |
| hsap|19:8783739-8782960|ZNF558 | 9 | K | solo |  | present | present | present | present | present | present | present | well validated |  |
| hsap|19:9131790-9133106|ZNF317 | 13 | K | solo |  | present | present | present | present | present | present | present | well validated |  |
| hsap|19:9268611-9267154|ZNF699 | 14 | K | 19.2 |  | present | present | present | present | present | present | present | validated |  |
| hsap|19:9313371-9314741|ZNF559 | 9 | K | 19.2 | Simian | present | present | present | present | present | absent | absent | well validated |  |
| hsap|19:9352824-9353450|ZNF177 | 7 | K | 19.2 |  | present | present | present | present | present | present | present | validated |  |
| hsap|19:9386396-9384954|ZNF266 | 12 | cK | 19.2 |  | present | present | present | present | present | present | present | validated, genomic KRAB present in some transcripts but no gene models |  |
| hsap|19:9440010-9438253|ZNF560 | 13 | KK | 19.2 | Simian | present | present | present | present | present | absent | absent | validated |  |
| hsap|19:9501312-9500059|ZNF426 | 11 | K | 19.2 |  | present | present | present | present | present | present | present | well validated |  |
| hsap|19:9538785-9537619|ZNF121 | 9 | none | 19.2 | Basal | present | present | present hand-assembled | present | present | present | absent | validated |  |
| hsap|19:9583012-9581879|ZNF561 | 8 | K | 19.2 | Catarrhine | present | present | present | present | prob absent inc TA | absent | absent | well validated |  |
| hsap|19:9625557-9624628|ZNF562 | 6 | K | 19.2 | Catarrhine | present | present hand-assembled | present | present hand-assembled | absent inc TA | absent | absent | well validated |  |
| hsap|19:9662938-9661817|LLNL733 | 7 | K | 19.2 | Catarrhine | present | present | prob present hand-assembled | prob present inc TA | absent inc TA | absent | absent | partially validated, recently named ZNF812 by Gencode |  |
| hsap|19:9730440-9729154|ZNF846 | 11 | K | 19.2 |  | present | present | present hand-assembled | present | present | present | present | validated |  |
| hsap|19:11588508-11589701|ZNF627 | 10 | K | 19.3 | Basal | present | present | present | present | present | present | absent | well validated |  |
| hsap|19:11623466-11624617|LLNL735 | 10 | K | 19.3 | Hominoid/Hominid | present | present | prob absent inc TA and syntenic DNA | absent inc TA | prob absent inc TA | absent | absent | weakly validated, recently name ZNF833 by Gencode, annotated as pseudogene but present ancestrally |  |
| hsap|19:11657042-11657602|ZNF833 | 6 | cK | 19.3 | Catarrhine | present | present | absent inc TA and syntenic DNA | present | absent inc TA | absent | absent | validated, genomic KRAB may be present in some transcripts |  |
| hsap|19:11695159-11693519|ZNF823 | 15 | K | 19.3 | Simian | present | present | present | present hand-assembled | present | absent | absent | well validated | aka ZF36 |
| hsap|19:11728348-11731748|OTTHUMT00000344526 pseudogene | NA | K | 19.3 |  |  |  |  |  |  |  |  | Gencode manual pseudogene |  |
| hsap|19:11751832-11753718|ZNF441 | 14 | K | 19.3 | Simian | present | present hand-assembled | present | present hand-assembled | present | absent | absent | validated |  |
| hsap|19:11777769-11779079|ZNF491 | 10 | cK | 19.3 | Basal | present | present | present | absent inc TA | absent inc TA | prob present | absent | validated, genomic KRAB may be present in some transcripts |  |
| hsap|19:11803181-11804776|ZNF440 | 9 | K | 19.3 | Catarrhine | present | present | present | present | absent inc TA | absent | absent | well validated |  |
| hsap|19:11839119-11840381|ZNF439 | 10 | K | 19.3 | Hominoid/Hominid | present | present | absent inc TA and syntenic DNA | absent inc TA | absent | absent | absent | validated |  |
| hsap|19:11876462-11877910|ZNF69 | 12 | K | 19.3 | Catarrhine | present | present | present | present hand-assembled | absent inc TA | absent | absent | validated | probably same as ZNF739 Stubbs |
| hsap|19:11920089-11922065|ZNF700 | 17 | K | 19.3 | Catarrhine | present | present | present | present | absent inc TA | absent | absent | well validated |  |
| hsap|19:11949929-11950921|ZNF763 | 6 | K | 19.3 | Simian | present | present | absent inc TA and syntenic DNA | absent inc TA | prob present | absent | absent | well validated |  |
| hsap|19:11988483-11986663|ZNF433 | 18 | K | 19.3 | Simian | present | present | present | present | present | absent | absent | validated |  |
| hsap|19:12017026-12015623|LOC729747 | 14 | K | 19.3 | Simian | present | present | present | present | present | absent | absent | partially validated, recently named ZNF878 by RefSeq |  |
| hsap|19:12047125-12048933|ZNF844 | 6 | K | 19.3 | Catarrhine | present | present | present | present | absent inc TA | absent | absent | well validated |  |
| hsap|19:12083363-12085207|ZNF788 | 14 | cK | 19.3 | Simian | present | present | present | present | present | absent | absent | structure unclear, ZF probably out of frame with genomic KRAB |  |
| hsap|19:12105802-12104405|ZNF20 | 11 | K | 19.3 | Catarrhine | present | present | present | present | absent inc TA | absent | absent | well validated |  |
| hsap|19:12118041-12117115|ZNF625 | 8 | cK | 19.3 | Simian | present | present | present | present | present | absent | absent | validated, some transcripts have KRAB |  |
| hsap|19:12158383-12159813|ZNF136 | 13 | K | 19.3 | Basal | present | present | absent | present | present | present | absent | well validated |  |
| hsap|19:12180000-12181034|LLNL739|10 pseudogene | NA | K | 19.3 |  |  |  |  |  |  |  |  | unvalidated, no gene name, no transcripts, presumed pseudogene |  |
| hsap|19:12220495-12219095|LLNL1177 | 13 | K | 19.3 | Basal | present | present | present hand-assembled | present | present | present | absent | weakly validated, no proper gene name, possible pseudogene but present ancestrally | macaque hand-assembly completely absent in reference assembly |
| hsap|19:12245880-12244225|ZNF44 | 14 | K | 19.3 | Simian | present | present | present | present | present | absent | absent | well validated |  |
| hsap|19:12291649-12290411|ZNF563 | 10 | K | 19.3 | Simian | present | present | present | present | present | absent | absent | well validated |  |
| hsap|19:12323134-12321518|ZNF442 | 14 | K | 19.3 | Simian | present hand-assembled | present | present | present | present | absent | absent | well validated |  |
| hsap|19:12351003-12373088|OTTHUMT00000344129 pseudogene | NA | K | 19.3 |  |  |  |  |  |  |  |  | Gencode manual pseudogene | annotated on some tracks as ZNF799 splice variant |
| hsap|19:12364022-12362283|ZNF799 | 15 | K | 19.3 | Simian | present | present | present | present | present | absent | absent | validated, second ZF exon potentially alternatively spliced |  |
| hsap|19:12403796-12401973|ZNF443 | 16 | K | 19.3 | Hominoid/Hominid | present | present | absent inc TA and syntenic DNA | absent inc TA | absent inc TA | absent | absent | well validated | macaque absence well confirmed by synteny |
| hsap|19:12437549-12435813|ZNF709 | 19 | K | 19.3 |  | present | present | present | present | present | present | present | validated |  |
| hsap|19:12499732-12498263|ZNF564 | 15 | K | 19.3 | Basal | present | present | present | present | present | present | absent | well validated |  |
| hsap|19:12553540-12552302|ZNF490 | 13 | K | 19.3 | Simian | present | present | present | present | present | prob absent | absent | validated |  |
| hsap|19:12599533-12601071|ZNF791 | 17 | K | 19.3 |  | present | present | present | present | present | present | present | well validated |  |
| hsap|19:14690040-14691134|ZNF333 | 10 | K | solo |  | present | present | present | present | present | present | present | well validated |  |
| hsap|19:19650988-19652106|ZNF101 | 8 | K | 19.4 | Simian | present | present | present | present | present | absent | absent | well validated |  |
| hsap|19:19684900-19683164|ZNF14 | 17 | K | 19.4 | Basal | present | present | present | present | present | present | absent | well validated |  |
| hsap|19:19767470-19766364|ZNF506 | 8 | K | 19.4 | Catarrhine | present | present | present | present | absent inc TA | absent | absent | well validated |  |
| hsap|19:19863282-19864553|ZNF253 | 11 | K | 19.4 | Catarrhine | present | present | present | present | absent inc TA | absent | absent | well validated |  |
| hsap|19:19904987-19906624|ZNF93 | 16 | K | 19.4 | Catarrhine | present | present | present | present | absent inc TA | absent | absent | well validated | aka ZNF505 |
| hsap|19:19979085-19977817|ZNF682 | 10 | K | 19.4 | Simian | present | present | present | present | present | absent | absent | validated |  |
| hsap|19:20089589-20091166|ZNF90 | 15 | K | 19.4 | Hominoid/Hominid | present | present | absent inc TA and syntenic DNA | absent inc TA | absent | absent | absent | partially validated | macaque absence confirmed by synteny |
| hsap|19:20168772-20169908|ZNF486 | 9 | K | 19.4 | Catarrhine | present | present | present | present hand-assembled | absent inc TA | absent | absent | validated |  |
| hsap|19:20370390-20369344|ZNF826 | 10 | cK | 19.4 | Hominoid/Hominid | absent inc TA and syntenic DNA | present | absent inc TA and syntenic DNA | absent inc TA | absent | absent | absent | partially validated, genomic KRAB may be in frame in some transcripts |  |
| hsap|19:20520626-20519241|ZNF737 | 13 | K | 19.4 | Catarrhine | present | present hand-assembled | present | absent inc TA | absent inc TA | absent | absent | validated |  |
| hsap|19:20600300-20598939|ZNF626 | 10 | K | 19.4 | Catarrhine | present | present | present | present hand-assembled | absent inc TA | absent | absent | well validated |  |
| hsap|19:20780469-20781965|ZNF66 | 13 | K | 19.4 | Catarrhine | present | absent inc TA and syntenic DNA tree | present | absent inc TA | absent inc TA | absent | absent | unvalidated, possible pseudogene but present ancestrally |  |
| hsap|19:20923389-20924945|ZNF85 | 15 | K | 19.4 | Catarrhine | present | present | present | present | absent inc TA | absent | absent | well validated |  |
| hsap|19:21031276-21032664|ZNF430 | 11 | K | 19.4 | Simian | present | present | present | absent inc TA | present | absent | absent | well validated |  |
| hsap|19:21091452-21092972|ZNF714 | 12 | K | 19.4 | Catarrhine | present | present | prob present | absent inc TA | absent inc TA | absent | absent | validated | macaque gene fragment clearly syntenic |
| hsap|19:21157265-21158674|ZNF431 | 12 | K | 19.4 | Simian | present | present | present | present hand-assembled | present | absent | absent | validated |  |
| uannotated KZNF pseudogene | NA | K | 19.4 |  |  |  |  |  |  |  |  | unpredicted, unvalidated, presumed pseudogene |  |
| hsap|19:21269382-21267919|ZNF708 | 14 | K | 19.4 | Simian | present | present hand-assembled | present | present hand-assembled | present | absent | absent | validated | aka ZNF15L1 |
| hsap|19:21357507-21358313|ZNF738 | 5 | K | 19.4 | Simian | present | absent inc TA and syntenic DNA tree | present | present | present | absent | absent | unvalidated, possible pseudogene but present ancestrally |  |
| hsap|19:21397554-21399623|ZNF493 | 18 | K | 19.4 | Catarrhine | present hand-assembled | present | present | present | absent inc TA | absent | absent | well validated |  |
| hsap|19:21510921-21512717|ZNF429 | 15 | K | 19.4 | Simian | present | present | present | absent inc TA | present hand-assembled | absent | absent | well validated |  |
| hsap|19:21630059-21630681|ENST00000397136 probable pseudogene | NA | K | 19.4 |  |  |  |  |  |  |  |  | transcript support dubious, presumed pseudogene |  |
| hsap|19:21702632-21701328|ZNF100 | 11 | K | 19.4 | Simian | present | present | present | present hand-assembled | present | absent | absent | well validated |  |
| hsap|19:21784450-21782252|ZNF43 | 19 | K | 19.4 | Simian | present | present | present | present | present | absent | absent | well validated |  |
| hsap|19:21949450-21945836|ZNF208 | 36 | K | 19.4 | Hominoid/Hominid | present | present hand-assembled | prob absent inc TA | absent inc TA | absent | absent | absent | very weakly validated, gene models have several introns in ZF exon, possible pseudogene | orangutan synteny absence unclear, macaque syntenic region complex with apparent independent duplicates, human segmental dupes reported but none cover whole ZF exon |
| hsap|19:22062618-22064081|ZNF257 | 11 | K | 19.4 | Simian | present | present | present | present | prob present hand-assembled | absent | absent | validated |  |
| hsap|19:22156229-22154595|ZNF676 | 14 | K | 19.4 | Hominoid/Hominid | present | present had | absent inc TA | absent inc TA | absent inc TA | absent | absent | weakly validated | macaque syntenic region complex with apparent independent duplicates |
| hsap|19:22288312-22291815|ZNF729 | 34 | K | 19.4 |  |  |  |  |  |  |  |  | very weakly validated, possible pseudogene | ZNF99 and ZNF729 are very similar |
| hsap|19:22367624-22366161|ZNF98 | 13 | K | 19.4 |  |  |  |  |  |  |  |  | validated | ZNF98 and ZNF492 are nearly identical |
| unannotated KZNF pseudogene | NA | K | 19.4 |  |  |  |  |  |  |  |  | unpredicted, unvalidated, presumed pseudogene, KRAB and ZF present |  |
| hsap|19:22638441-22639904|ZNF492 | 12 | K | 19.4 |  |  |  |  |  |  |  |  | validated | ZNF98 and ZNF492 are nearly identical |
| hsap|19:22734328-22731959|ZNF99 | 21 | K | 19.4 |  |  |  |  |  |  |  |  | unvalidated, gene models have several introns in ZF exons, possible pseudogene | ZNF99 and ZNF729 are very similar |
| hsap|19:22831759-22833072|ZNF723 | 12 | K | 19.4 | Catarrhine | present | present | prob present hand-assembled | absent inc TA | absent inc TA | absent | absent | unvalidated | macaque gene near syntenic position but region correspondence complex |
| hsap|19:22951753-22950113|ZNF728 | 14 | K | 19.4 | Catarrhine | present | present | present hand-assembled | absent inc TA | absent inc TA | absent | absent | weakly validated | macaque hand-assembly completely absent in reference assembly |
| hsap|19:23119912-23121195|ZNF730 | 10 | K | 19.4 | Catarrhine | present hand-assembled | present | present hand-assembled | absent inc TA | absent inc TA | absent | absent | validated |  |
| hsap|19:23198661-23197030|ZNF724 | 14 | K | 19.4 | Simian | present | present | present | present | present | absent | absent | partially validated |  |
| hsap|19:23337368-23334048|ZNF91 | 31 | K | 19.4 | Catarrhine | present | present hand-assembled | present | present | absent inc TA | absent | absent | well validated |  |
| hsap|19:23467975-23466707|ZNF725 | 9 | K | 19.4 | Hominoid/Hominid | present | present | absent inc TA and syntenic DNA | absent inc TA | absent | absent | absent | unvalidated, gene models have several introns in ZF exons, possible pseudogene but present ancestrally | macaque gene probably absent by synteny but region complex, no segmental dupes reported |
| hsap|19:23571983-23572234|OTTHUMT00000350188 pseudogene | NA | none | 19.4 |  |  |  |  |  |  |  |  | Gencode manual pseudogene, no KRAB |  |
| hsap|19:23629349-23627871|ZNF675 | 11 | K | 19.4 | Simian | present | present | present | present hand-assembled | present | absent | absent | well validated |  |
| hsap|19:23719966-23718257|ZNF681 | 11 | K | 19.4 | Catarrhine | present | present | present | present | absent inc TA | absent | absent | validated | macaque gene clearly syntenic on small inversion |
| hsap|19:23737656-23802759|ZNF67P pseudogene | NA | K | 19.4 |  |  |  |  |  |  |  |  | Gencode manual and RefSeq pseudogene | aka RPSAP58 |
| hsap|19:23906984-23908606|ZNF726 | 14 | K | 19.4 | Catarrhine | present hand-assembled | present | present | present | absent inc TA | absent | absent | unvalidated but Gencode annotated gene |  |
| hsap|19:24100895-24102619|ZNF254 | 13 | K | 19.4 | Simian | present | present | present | present hand-assembled | present | absent | absent | well validated |  |
| hsap|19:39726225-39725272|LLNL1007 | 7 | K | 19.5 |  |  |  |  |  |  |  |  | no EST support, no predictions, possible pseudogene | ZNF181, ZNF302, and LLNL1007 are very similar |
| hsap|19:39866996-39867979|ZNF302 | 7 | K | 19.5 |  |  |  |  |  |  |  |  | well validated | ZNF181, ZNF302, and LLNL1007 are very similar |
| hsap|19:39923355-39924839|ZNF181 | 11 | K | 19.5 |  |  |  |  |  |  |  |  | well validated | ZNF181, ZNF302, and LLNL1007 are very similar |
| hsap|19:39943305-39941782|ZNF599 | 14 | K | 19.5 |  | present | present | present | present | present | present | present | well validated |  |
| hsap|19:40125966-40127579|ZNF30 | 16 | K | 19.5 |  | present | present | present | present | absent inc TA | absent | present | well validated |  |
| hsap|19:40142319-40140703|ZNF792 | 12 | K | 19.5 |  | present | present | present | present | present | present | present | validated |  |
| hsap|19:41366476-41365211|ZNF565 | 12 | K | 19.6 |  | present | present | present hand-assembled | present | present | present | present | well validated |  |
| hsap|19:41419183-41420058|ZNF146 | 10 | none | 19.6 |  | present | present | present | present hand-assembled | present | present | present | validated |  |
| hsap|19:41524333-41522969|ZFP14 | 13 | K | 19.6 |  | present | present | present | present | present | present | present | validated |  |
| hsap|19:41576853-41575486|ZFP82 | 12 | K | 19.6 |  | present | present | present | present hand-assembled | present | present | present | well validated | aka ZNF545 |
| hsap|19:41632744-41631722|ZNF566 | 7 | K | 19.6 |  | present | present | present hand-assembled | present | present | present | present | well validated |  |
| hsap|19:41697980-41696745|ZNF260 | 13 | none | 19.6 |  | present | present | present | present | present | present | present | validated |  |
| hsap|19:41731065-41729611|ZNF529 | 9 | K | 19.6 |  | present | present | present | present | present | present | present | well validated |  |
| hsap|19:41808868-41810289|ZNF382 | 9 | K | 19.6 |  | present | present | present | present | present | present | present | validated |  |
| hsap|19:41822786-41821398|ZNF461 | 10 | K | 19.6 |  | present | present | present | present | present | present | present | well validated | aka GIOT1 |
| hsap|19:41901686-41903407|ZNF567 | 14 | K | 19.6 |  | present | present | present | present | present | present | present | well validated |  |
| hsap|19:41933547-41930512|LLNL624 | 29 | K | 19.6 | Simian | present | present | present | present | present | absent | absent | partially validated |  |
| hsap|19:42002857-42001178|ZNF790 | 12 | K | 19.6 |  | present | present | present | present | present | present | present | well validated |  |
| hsap|19:42059573-42061036|ZNF345 | 15 | cK | 19.6 |  | present | present | present | present | present | present | present | validated |  |
| hsap|19:42075217-42074237|ZNF829 | 9 | K | 19.6 |  | present | present | present | present | present | present | present | validated |  |
| hsap|19:42132253-42133827|ZNF568 | 15 | K | 19.6 |  | present | present | present | present | present | present | present | well validated |  |
| hsap|19:42179058-42180338|LLNL755 | 10 | K | 19.6 |  | present | present | present | absent inc TA | absent inc TA | present | present | validated, some transcripts join this to ZNF568 so named as the same gene, but clearly rare |  |
| hsap|19:42309869-42311797|ZNF420 | 19 | K | 19.6 |  | present | present | present | present | present | present | present | well validated |  |
| hsap|19:42336349-42334334|ZNF585A | 21 | K | 19.6 |  |  |  |  |  |  |  |  | well validated | ZNF585A and B are very similar |
| hsap|19:42369987-42367972|ZNF585B | 21 | K | 19.6 |  |  |  |  |  |  |  |  | well validated | ZNF585A and B are very similar |
| hsap|19:42425207-42426403|ZNF383 | 11 | K | 19.6 |  | present | present | present | present | present | present | present | well validated |  |
| hsap|19:42544850-42546514|HKR1 | 13 | K | 19.6 |  | present | present | present hand-assembled | present | present | present | present | well validated |  |
| hsap|19:42571047-42572618|ZNF527 | 11 | K | 19.6 |  | present | present | present | present | present | present | present | well validated |  |
| hsap|19:42597162-42595342|ZNF569 | 18 | K | 19.6 |  | present | present | present | present | present | present | present | well validated |  |
| hsap|19:42666617-42667972|ZNF570 | 11 | K | 19.6 |  | present | present | present | present | present | present | present | validated |  |
| hsap|19:42719638-42720618|ZNF793 | 6 | K | 19.6 |  | present | present | present | present | present | present | present | validated |  |
| hsap|19:42749034-42747343|ZNF571 | 16 | K | 19.6 |  | present | present | present | present | present | absent | present | well validated |  |
| hsap|19:42794265-42796001|ZNF540 | 17 | K | 19.6 |  | present | present hand-assembled | present | present | present | absent | present | well validated |  |
| hsap|19:42819047-42817725|ZFP30 | 12 | K | 19.6 |  | present | present | present | present | present | present | present | well validated |  |
| hsap|19:42852889-42851909|ZNF781 | 3 | cK | 19.6 | Catarrhine | present | present | present | present | absent inc TA | absent | absent | validated, genomic KRAB found in a few transcripts but not found in any gene models |  |
| hsap|19:42882637-42880784|ZNF607 | 18 | K | 19.6 | Basal | present | present | present | present | present | present | absent | validated |  |
| hsap|19:42922936-42921236|ZNF573 | 19 | K | 19.6 |  | present hand-assembled | present | present | present | present | present | present | validated |  |
| hsap|19:45211411-45213525|ZNF546 | 22 | K | 19.7 |  | present | present | present | present | present | present | present | well validated |  |
| hsap|19:45234374-45232107|ZNF780B | 21 | K | 19.7 | Simian | present | prob present hand-assembled | present | present | present | absent | absent | validated |  |
| hsap|19:45273957-45272266|ZNF780A | 17 | K | 19.7 | Simian | present hand-assembled | present | present | present | present | absent | absent | validated |  |
| hsap|19:47274599-47277286|ZNF574 | 16 | none | solo |  | present | present | present | present | present | present | present | well validated, no genomic KRAB anywhere | many species have a second closely-related copy |
| hsap|19:47420396-47422405|ZNF526 | 10 | none | solo |  | present | present | present | present | present | present | present | well validated, no genomic KRAB anywhere |  |
| hsap|19:48731020-48731676|ZNF575 | 6 | none | solo |  | present | present | prob absent inc TA and syntenic DNA | present | present | present | present | validated, no KRAB in genome |  |
| hsap|19:48794825-48795247|ZNF576 | 3 | none | solo |  | present | present | present | present | present | present | present | well validated, no genomic KRAB anywhere |  |
| hsap|19:49042930-49044630|ZNF283 | 15 | K | 19.8 |  | present | present | present | present | present | present | present | validated |  |
| hsap|19:49070070-49068550|ZNF404 | 14 | K | 19.8 |  | present | present | present | present | absent inc TA | absent | present | validated |  |
| hsap|19:49111193-49109382|ZNF45 | 15 | K | 19.8 |  | present | present | present | present | present | present | present | validated |  |
| hsap|19:49161795-49163345|ZNF221 | 15 | K | 19.8 | Basal | present | present | present | present hand-assembled | present | present | absent | validated |  |
| hsap|19:49192084-49193463|ZNF155 | 11 | K | 19.8 | Simian | present | present | present | present | present | absent | absent | well validated |  |
| hsap|19:49206260-49207453|ZNF230 | 7 | K | 19.8 | Catarrhine | present | present | present | present | absent inc TA | absent | absent | well validated |  |
| hsap|19:49227809-49229020|ZNF222 | 8 | K | 19.8 | Catarrhine | present | present | present | present hand-assembled | absent inc TA | absent | absent | well validated |  |
| hsap|19:49262056-49263267|ZNF223 | 8 | K | 19.8 | Simian | present | present hand-assembled | present | present | present | absent | absent | well validated |  |
| hsap|19:49281706-49283250|ZNF284 | 11 | K | 19.8 | Simian | present | present | present | present | present | prob absent | absent | well validated |  |
| hsap|19:49302388-49304274|ZNF224 | 18 | K | 19.8 | Basal | present | present | present | present hand-assembled | present | prob present | absent | well validated |  |
| hsap|19:49326842-49328725|ZNF225 | 17 | K | 19.8 | Basal | present | present | present | present | present | prob present | absent | well validated |  |
| hsap|19:49352244-49354109|ZNF234 | 18 | K | 19.8 |  | present | present | present | present | present | present | present | well validated |  |
| hsap|19:49371490-49373664|ZNF226 | 17 | K | 19.8 |  | present | present | present | present | present | present | present | well validated |  |
| hsap|19:49430697-49432820|ZNF227 | 18 | K | 19.8 |  | present | present | present | present | present | present | present | well validated |  |
| hsap|19:49468891-49470663|ZNF233 | 7 | K | 19.8 |  | present | present | present | present | absent inc TA | present | present | validated |  |
| hsap|19:49485193-49483214|ZNF235 | 15 | K | 19.8 |  | present | present | present | present | present | present | present | validated |  |
| hsap|19:49525930-49523429|ZFP112 | 13 | K | 19.8 |  | present | present | present | present | present | present | present | well validated |  |
| hsap|19:49584102-49582477|ZNF285 | 10 | K | 19.8 |  | present | present | present | present | present | present | present | validated | aka ZNF285A |
| hsap|19:49626558-49624321|ZNF229 | 16 | K | 19.8 |  | present | present | present | present | absent inc TA | present | present | validated |  |
| hsap|19:49668203-49669228|ENSG00000176761 pseudogene | NA | K | 19.8 |  |  |  |  |  |  |  |  | ENSEMBL annotated pseudogene |  |
| hsap|19:49674204-49672462|ZNF180 | 12 | K | 19.8 |  | present | present | present | present | present | present | present | well validated |  |
| hsap|19:50267679-50266702|ZNF296 | 4 | none | solo |  | present | present | present | present | present | present | present | validated, no KRAB in genome |  |
| hsap|19:53480829-53481944|ZNF114 | 3 | K | solo |  | present | present | present | present | present | present | present | validated |  |
| hsap|19:55239738-55242125|ZNF473 | 18 | K | solo |  | present | present | present | present | present | present | present | validated |  |
| hsap|19:56781691-56783529|ZNF175 | 13 | K | solo |  | present | present | present | present | present | present | present | well validated |  |
| probable unannotated KZNF pseudogene | NA | K | 19.9 |  |  |  |  |  |  |  |  | no transcripts, no annotation |  |
| hsap|19:57068772-57067600|ZNF577 | 7 | K | 19.9 |  | present | present | present | present | present | present | present | well validated |  |
| hsap|19:57086963-57085686|ZNF649 | 10 | K | 19.9 | Catarrhine | present | present | present | present | absent inc TA | absent | absent | well validated |  |
| hsap|19:57111354-57110149|LLNL758 pseudogene | NA | K | 19.9 |  |  |  |  |  |  |  |  | no transcript support, no Gencode annotation, presumed pseudogene |  |
| hsap|19:57139183-57140799|ZNF613 | 11 | K | 19.9 |  | present | present | present | present | present | present | present | validated |  |
| hsap|19:57161280-57159922|ZNF350 | 8 | K | 19.9 |  | present | present | present | present | present | present | present | well validated |  |
| hsap|19:57189903-57187948|ZNF615 | 19 | K | 19.9 |  | present | present | present | present | present | present | present | well validated |  |
| hsap|19:57212425-57210908|ZNF614 | 10 | K | 19.9 |  | present | present | present | present | present | present | present | well validated |  |
| hsap|19:57230506-57228788|ZNF432 | 16 | K | 19.9 |  | present | present | present | present | present | present | present | well validated |  |
| hsap|19:57262676-57260175|ZNF841 | 20 | K | 19.9 | Simian | present | present | present | present | present | absent | absent | validated |  |
| hsap|19:57312090-57309886|ZNF616 | 21 | K | 19.9 | Simian | present | present | present | present | present | absent | absent | well validated |  |
| hsap|19:57352606-57349940|ZNF836 | 24 | K | 19.9 | Simian | present | present | present hand-assembled | present | present | absent | absent | validated |  |
| hsap|19:57485130-57486260|ZNF766 | 7 | K | 19.9 | Simian | present | present | present | present | present | absent | absent | well validated |  |
| hsap|19:57516643-57517920|ZNF480 | 10 | K | 19.9 | Simian | present | present | present | present hand-assembled | present | prob absent | absent | well validated |  |
| hsap|19:57560762-57561829|ZNF610 | 8 | K | 19.9 | Simian | present | present | present | present | present | absent | absent | well validated |  |
| hsap|19:57578913-57580376|LLNL759 | 13 | K | 19.9 | Simian | present | present | present | present | present | absent | absent | validated but still not named and not yet done by Gencode | aka LOC400713 |
| hsap|19:57610188-57611801|ZNF528 | 15 | K | 19.9 | Simian | present | present | present | present | prob present | absent | absent | well validated |  |
| hsap|19:57632796-57634508|ZNF534 | 14 | K | 19.9 | Catarrhine | present | present | present | present | absent inc TA | absent | absent | validated |  |
| hsap|19:57705633-57707216|ZNF578 | 10 | K | 19.9 | Hominoid/Hominid | present | present | absent inc TA and syntenic DNA | absent inc TA | absent | absent | absent | validated |  |
| hsap|19:57748168-57750690|ZNF808 | 23 | K | 19.9 | Catarrhine | present | present | present | present hand-assembled | absent inc TA | absent | absent | validated |  |
| hsap|19:57777266-57778519|ZNF701 | 7 | K | 19.9 | Catarrhine | present | present | present | absent inc TA | absent inc TA | absent | absent | well validated |  |
| hsap|19:57791749-57795217|ZNF137 probable pseudogene | NA | K | 19.9 |  |  |  |  |  |  |  |  | Gencode manual and RefSeq pseudogene |  |
| hsap|19:57809629-57808082|ZNF83 | 14 | cK | 19.9 |  | present | present | present | present hand-assembled | absent inc TA | present | present | validated, in-frame genomic KRAB found in many transcripts but no gene models |  |
| hsap|19:57849469-57847736|LOC729840 | 14 | K | 19.9 | Catarrhine | present | present | present | present | absent inc TA | absent | absent | validated, LLNL gene model looks reasonable, no others available |  |
| hsap|19:57901933-57900005|ZNF611 | 13 | K | 19.9 | Catarrhine | present | present | present | present hand-assembled | absent inc TA | absent | absent | well validated |  |
| hsap|19:57962841-57960655|ZNF600 | 18 | K | 19.9 | Catarrhine | present | present | present hand-assembled | present hand-assembled | absent inc TA | absent | absent | partially validated, one EST supports LLNL KRAB model | macaque hand-assembly completely absent in reference assembly |
| hsap|19:57996768-57994756|ZNF28 | 15 | K | 19.9 | Catarrhine | present | present | present hand-assembled | absent inc TA | absent inc TA | absent | absent | validated, many ESTs support LLNL KRAB model | macaque hand-assembly completely absent in reference assembly |
| hsap|19:58037217-58035793|ZNF468 | 10 | K | 19.9 | Catarrhine | present | present | present | present hand-assembled | absent inc TA | absent | absent | well validated |  |
| hsap|19:58077049-58075664|ZNF320 | 11 | K | 19.9 | Catarrhine | present | present | present | prob absent inc TA | absent inc TA | absent | absent | validated |  |
| hsap|19:58103299-58101233|LLNL1200 | 17 | K | 19.9 | Catarrhine | present | present | present | present hand-assembled | absent inc TA | absent | absent | no transcript support, no Gencode annotation, but histone and Pol2 signal |  |
| hsap|19:58146650-58144887|ZNF816A | 14 | K | 19.9 | Catarrhine | present | present | present | present hand-assembled | prob absent inc TA | absent | absent | well validated |  |
| hsap|19:58163316-58188596|ZNF702P pseudogene | NA | none | 19.9 |  |  |  |  |  |  |  |  | Gencode manual and RefSeq pseudogene |  |
| hsap|19:58265328-58263145|ZNF160 | 20 | K | 19.9 | Basal | present | present | present | present | present | present | absent | well validated |  |
| hsap|19:58304974-58303445|ZNF415 | 11 | K | 19.9 | Basal | present | present | present | present | present | prob present | absent | well validated |  |
| hsap|19:58337622-58335376|ZNF347 | 17 | K | 19.9 | Simian | present | present | present | present | present | absent | absent | well validated |  |
| hsap|19:58361413-58359521|ZNF665 | 18 | K | 19.9 | Catarrhine | present | present | present | present | absent inc TA | absent | absent | validated |  |
| hsap|19:58406045-58407571|LLNL342 | 12 | K | 19.9 | Catarrhine | present | present | present hand-assembled | present | absent inc TA | absent | absent | weak transcript support, Gencode annotated pseudogene, but possible histone and Pol2 signal | macaque hand-assembly completely absent in reference assembly |
| hsap|19:58433623-58432040|ZNF677 | 10 | K | 19.9 |  | present | present | present | present | absent inc TA | present | present | well validated |  |
| hsap|19:58545990-58548650|ZNF845 | 26 | K | 19.10 | Catarrhine | present | present | present | present hand-assembled | absent inc TA | absent | absent | validated | aka LLNL648 |
| hsap|19:58575786-58577081|ZNF525 | 8 | K | 19.10 | Catarrhine | present | present | prob present | absent inc TA | absent inc TA | absent | absent | partially validated | aka NR_003699 |
| hsap|19:58602759-58604189|ZNF765 | 8 | K | 19.10 | Catarrhine | present | present | prob present | unclear inc TA | absent inc TA | absent | absent | validated |  |
| hsap|19:58649718-58651811|ZNF761 | 17 | K | 19.10 | Catarrhine | present | present | present | present | absent inc TA | absent | absent | validated |  |
| hsap|19:58685440-58687149|ZNF813 | 13 | K | 19.10 | Catarrhine | present | present | present hand-assembled | present hand-assembled | absent inc TA | absent | absent | validated |  |
| hsap|19:58771762-58773015|ZNF331 | 12 | K | 19.10 |  | present | present | present | present | present | present | present | well validated |  |
| hsap|19:60684406-60687549|ZNF628 | 16 | none | 19.11 |  | present | present | present | present | present | present | present | validated, no KRAB in genome |  |
| hsap|19:60782817-60781132|ZNF579 | 7 | none | 19.11 |  | present | present | present | present | present | present | present | validated, no KRAB in genome |  |
| hsap|19:60796824-60795631|FIZ1 | 5 | none | 19.11 |  | present | present | present | present | present | present | present | validated |  |
| hsap|19:60805291-60806082|ZNF524 | 3 | none | 19.11 |  | present | present | present | present | present | present | present | validated, no KRAB in genome |  |
| hsap|19:60817151-60819973|LLNL764 | 20 | none | 19.11 |  | present | present | present | present | present | present | present | weakly validated |  |
| hsap|19:60825822-60824932|ZNF784 | 6 | none | 19.11 |  | present | present | present | present | present | present | present | validated, no KRAB in genome |  |
| hsap|19:60845687-60846202|ZNF580 | 3 | none | 19.11 |  | present | present | present | present | present | present | present | validated, no KRAB in genome |  |
| hsap|19:60847750-60848340|ZNF581 | 3 | none | 19.11 |  | present | present | present | present | prob absent inc TA | present | present | validated, no KRAB in genome |  |
| hsap|19:61292277-61291255|ZNF787 | 6 | none | 19.12 |  | present | present | present | present | present | present | present | validated, no KRAB in genome |  |
| hsap|19:61362804-61363379|ZNF444 | 4 | S | 19.12 |  | present | present | present | present | present | present | present | validated, no KRAB in genome, SCAN only |  |
| hsap|19:61393754-61393011|ZSCAN5B | 5 | S | 19.12 | Simian | present | present | present | present | present | absent | absent | validated, no KRAB in genome, SCAN only |  |
| hsap|19:61411632-61412378|ZSCAN5C | 5 | S | 19.12 | Catarrhine | present | present | present | present hand-assembled | prob absent | absent | absent | unvalidated but Gencode annotated gene, no KRAB in genome, SCAN only | marmoset gene has hybrid A-C characters |
| hsap|19:61425505-61424759|ZSCAN5A | 5 | S | 19.12 | Simian | present | present | present | present | present | absent | absent | validated, no KRAB in genome, SCAN only |  |
| unannotated SCAN only, probable pseudogene | NA | S | 19.12 |  |  |  |  |  |  |  |  | no transcript support |  |
| hsap|19:61580428-61581150|ZNF542 | 7 | cK | 19.12 |  | present | present | present | present | present | absent | present | many transcripts but structure unclear, KRAB present in genome |  |
| hsap|19:61588366-61587047|ZNF582 | 9 | K | 19.12 |  | present | present | present | present | present | present | present | well validated |  |
| hsap|19:61626071-61627546|ZNF583 | 12 | K | 19.12 |  | present | present | present | present | present | present | present | well validated |  |
| hsap|19:61645923-61644346|ZNF667 | 14 | K | 19.12 |  | present | present | present | present | present | present | present | well validated |  |
| hsap|19:61727501-61729126|ZNF471 | 14 | K | 19.12 |  | present | present | present | present | present | present | present | well validated |  |
| hsap|19:61756861-61758570|ZFP28 | 13 | K | 19.12 |  | present | present | present | present | present | present | present | well validated |  |
| hsap|19:61779892-61781760|ZNF470 | 16 | K | 19.12 |  | present hand-assembled | present hand-assembled | present | present | present | present | present | validated |  |
| hsap|19:61824447-61825934|ZNF71 | 13 | K | 19.12 |  | present | present | present | present | present | present | present | validated, some transcripts have KRAB |  |
| hsap|19:61868423-61866768|ZNF835 | 14 | none | 19.12 |  | present | present | present | present | present | present | present | validated, no KRAB in genome |  |
| hsap|19:61978710-61977871|ZIM2 | 5 | SK | 19.12 |  | present | present | present | present | present | present | present | validated, SCAN in genome but not in any transcript |  |
| hsap|19:62020757-62016858|PEG3 | 12 | SK | 19.12 |  | present | present | present | present | present | present | present | alternative splice form of ZIM2, distinct ZF exon | despite high divergence, trees well and always adjacent in genome to ZIM2 |
| hsap|19:62339276-62338101|ZIM3 | 10 | K | 19.12 |  | present | present | present | present | present | absent | present | validated |  |
| hsap|19:62414533-62416158|ZNF264 | 13 | K | 19.12 |  | present | present | present | present | present | present | present | validated |  |
| hsap|19:62456252-62457880|ZNF805 | 13 | K | 19.12 | Basal | present | present | present | present | present | present | absent | weak validation, KRAB in genome not in gene models other than LLNL |  |
| hsap|19:62493878-62495407|ZNF272 | 11 | K | 19.12 | Basal | present | present | present | present | present | prob present | absent | well validated |  |
| hsap|19:62530880-62532442|ZNF543 | 13 | K | 19.12 | Simian | present | present | present | present | present | prob absent | absent | validated |  |
| hsap|19:62559209-62561026|ZNF304 | 15 | K | 19.12 |  | present | present | present | present | present | present | present | validated |  |
| hsap|19:62580307-62581362|ZNF547 | 10 | K | 19.12 | Basal | present | present | present | present | present | present | absent | validated |  |
| hsap|19:62601609-62603066|ZNF548 | 11 | K | 19.12 |  | present | present | present | present | present | present | present | well validated |  |
| hsap|19:62622781-62624658|ZNF17 | 18 | K | 19.12 | Simian | present | present | present | present | present | absent | absent | well validated |  |
| hsap|19:62646470-62648662|ZNF749 | 13 | K | 19.12 | Simian | present hand-assembled | present | present | present | prob present | absent | absent | validated |  |
| hsap|19:62677602-62676457|ZNF772 | 10 | K | 19.12 |  | present | present | present | present | present | present | present | validated |  |
| hsap|19:62696035-62697267|ZNF419 | 11 | K | 19.12 | Catarrhine | present | present | present | present | absent inc TA | absent | absent | well validated |  |
| hsap|19:62709537-62710601|ZNF773 | 9 | K | 19.12 |  | present | present | present | present | present | present | present | validated |  |
| hsap|19:62740383-62742104|ZNF549 | 11 | K | 19.12 | Basal | present | present | present | present | present | present | absent | well validated |  |
| hsap|19:62751174-62750158|ZNF550 | 8 | K | 19.12 |  | present | present | present | present | present | present | present | validated |  |
| hsap|19:62776882-62775302|ZNF416 | 11 | K | 19.12 |  | present | present | present | present | present | present | present | validated |  |
| hsap|19:62793190-62794452|ZIK1 | 9 | K | 19.12 | Basal | present | present | present | present | present | present | absent | validated |  |
| hsap|19:62808865-62810502|ZNF530 | 13 | K | 19.12 | Basal | present | present | present | present hand-assembled | absent inc TA | prob present | absent | validated |  |
| hsap|19:62823339-62824580|ZNF134 | 10 | cK | 19.12 |  | present | present hand-assembled | present | present | present | present | present | validated, KRAB in genome but not in transcripts |  |
| hsap|19:62843883-62845358|ZNF211 | 11 | K | 19.12 |  | present | present | present | present | present | present | present | well validated |  |
| hsap|19:62881345-62882082|ZSCAN4 | 4 | S | 19.12 |  | present | present | present | present | present | present | present | validated |  |
| hsap|19:62889660-62891465|ZNF551 | 14 | K | 19.12 |  | present | present | present | present | present | present | present | well validated |  |
| hsap|19:62905969-62904818|ZNF154 | 10 | K | 19.12 |  | present | present | present | present | present | present | present | well validated |  |
| hsap|19:62924878-62923664|ZNF671 | 9 | K | 19.12 |  | present | present | present | present | present | present | present | well validated |  |
| hsap|19:62956467-62957864|ZNF776 | 9 | K | 19.12 | Simian | present | present | present | present | present | absent | absent | well validated |  |
| hsap|19:62981927-62982973|ZNF586 | 8 | K | 19.12 | Simian | present | present | present | present | prob present hand-assembled | absent | absent | well validated |  |
| hsap|19:63012356-63011223|ZNF552 | 6 | K | 19.12 | Catarrhine | present | present | present | present | absent inc TA | absent | absent | well validated |  |
| hsap|19:63044017-63045753|LLNL653 | 15 | K | 19.12 | Hominoid/Hominid | present | present | absent inc TA and syntenic DNA | absent inc TA | absent inc TA | absent | absent | validated, not named |  |
| hsap|19:63061755-63063317|ZNF587 | 13 | K | 19.12 |  |  |  |  |  |  |  |  | well validated | ZNF417 and ZNF587 are nearly identical |
| hsap|19:63077813-63076005|ZNF814 | 21 | K | 19.12 | Simian | present | present | absent inc TA and syntenic DNA | present | present | absent | absent | partially validated |  |
| hsap|19:63113295-63111733|ZNF417 | 12 | K | 19.12 |  |  |  |  |  |  |  |  | well validated | ZNF417 and ZNF587 are nearly identical |
| hsap|19:63131228-63129333|ZNF418 | 16 | K | 19.12 | Simian | present | present | present | present | present | absent | absent | well validated |  |
| hsap|19:63145828-63144107|ZNF256 | 15 | K | 19.12 |  | present | present | present | present | present | present | present | well validated |  |
| hsap|19:63183460-63181484|ZNF606 | 13 | K | 19.12 |  | present | present | present | present | present | present | present | well validated |  |
| hsap|19:63256608-63257228|ZSCAN1 | 3 | S | 19.12 |  | present | present | present | present | present | absent | present | well validated |  |
| hsap|19:63269920-63271638|ZNF135 | 16 | K | 19.12 |  | present | present | present | present | present | present | present | well validated |  |
| hsap|19:63288562-63287867|ZSCAN18 | 2 | S | 19.12 |  | present | present | present | present | present | present | present | well validated |  |
| hsap|19:63332682-63331060|ZNF329 | 12 | none | 19.12 |  | present | present | present | present | present | present | present | well validated, no KRAB in genome |  |
| hsap|19:63415338-63416318|ZNF274 | 5 | KSK | 19.12 |  | present | present | present | present | present | present | present | well validated |  |
| hsap|19:63464028-63465929|ZNF544 | 12 | K | 19.12 | Catarrhine | present | present | present | present | absent inc TA | absent | absent | well validated |  |
| hsap|19:63497275-63498711|ZNF8 | 7 | K | 19.12 |  | present | present | present hand-assembled | present | present | present | present | well validated |  |
| hsap|19:63541431-63542501|ZSCAN22 | 8 | S | 19.12 |  | present | present | present | present | present | absent | present | validated |  |
| hsap|19:63560813-63559320|ZNF497 | 14 | cS | 19.12 | Catarrhine | present | present | present | present | absent inc TA | absent | absent | validated, SCAN in genome but not in transcripts |  |
| hsap|19:63572511-63570919|ZNF837 | 8 | none | 19.12 |  | present | present | present | present | present | present | present | validated, no KRAB in genome | old gene but lost in many species |
| hsap|19:63619989-63620960|ZNF584 | 8 | K | 19.12 |  | present | present | present | present | present | present | present | validated |  |
| hsap|19:63638391-63636505|ZNF132 | 17 | K | 19.12 |  | present | present | present | present | present | present | present | validated |  |
| hsap|19:63658361-63659755|ZNF324B | 9 | K | 19.12 |  |  |  |  |  |  |  |  | validated | ZNF324A and ZNF324B are very similar |
| hsap|19:63673909-63675330|ZNF324A | 9 | K | 19.12 |  |  |  |  |  |  |  |  | validated | ZNF324A and ZNF324B are very similar |
| hsap|19:63683354-63683902|ZNF446 | 3 | SK | 19.12 |  | present | present | present | present | present | present | present | validated |  |
| hsap|19:63766684-63765254|MZF1 | 13 | S | solo |  | present | present | present | present | present | present | present | validated |  |
| hsap|20:2413303-2411810|ZNF343 | 12 | K | solo | Catarrhine | present | present | present | present hand-assembled | absent inc TA | prob absent | absent | well validated |  |
| hsap|20:18243715-18245457|ZNF133 | 14 | K | solo |  | present | present | present | present | present | present | present | well validated |  |
| hsap|20:25605674-25603671|ZNF337 | 18 | K | solo | Simian | present | present | present | present hand-assembled | present | absent | absent | well validated |  |
| hsap|20:44552713-44554671|LLNL1069 | 18 | K | 20.1 |  | present | present | present | present | present | present | present | no validation, Havana_unprocessed_pseudogene, possible pseudogene |  |
| hsap|20:44565144-44563345|ZNF334 | 14 | K | 20.1 |  | present | present | present | present | present | present | present | well validated |  |
| hsap|22:19089666-19091255|ZNF74 | 12 | K | solo |  | present | present | present | present | present | present | present | well validated |  |
| hsap|22:22417327-22415990|ZNF70 | 10 | none | solo |  | present | present | absent | present | present | present | present | weakly validated |  |
| hsap|X:46191568-46219018|ZNF673 no ZF in coding sequence | NA | none | X.1 |  |  |  |  |  |  |  |  | genomic ZF hits not in frame |  |
| hsap|X:46245748-46244225|ZNF674 | 11 | K | X.1 |  | present | present hand-assembled | present | present | present | present | present | well validated |  |
| hsap|X:47156711-47157934|ZNF157 | 12 | K | X.2 |  | present | present | present | present | present | present | present | validated |  |
| hsap|X:47193818-47191776|ZNF41 | 17 | K | X.2 |  | present | present | present | present | present | present | present | well validated |  |
| hsap|X:47659266-47660972|ZNF81 | 12 | K | X.3 |  | present | present | present | present | present | present | present | validated |  |
| hsap|X:47722141-47720513|ZNF21 | 14 | K | X.3 |  | present | present | present | present | present | present | present | well validated |  |
| hsap|X:47804537-47802804|ZNF630 | 11 | K | X.3 |  | present | present | present | present | prob present hand-assembled | absent | present | well validated |  |
| hsap|X:47,852,414-48,158,396|cluster of SSX KRAB genes | NA | KSSX | X.3 |  |  |  |  |  |  |  |  |  |  |
| hsap|X:134249445-134248738|ZNF75D | 5 | SK | X.4 |  |  |  |  |  |  |  |  | well validated | ZNF75A and ZNF75D are very similar |
| hsap|X:134321783-134322664|ZNF449 | 7 | S | X.4 |  | present | present | present | present | present | present | present | well validated, SCAN only |  |
| hsap|X:152265308-152266624|ZNF275 | 11 | K | X.5 |  | present | present | present | present | present | present | present | well validated |  |
| hsap|X:152339294-152340277|ZFP92 | 8 | K | X.5 |  | present | present | present | present | present | present | present | weakly validated |  |
|  |  |  |  |  |  |  |  |  |  |  |  |  |  |
|  |  |  |  |  |  |  |  |  |  |  |  |  |  |
| In all cases, final assessment as an ortholog was based on well-supported maximum-likelihood trees of proteins encoded by the tandem ZF exon. Rare uncertainties are marked with "prob" (probably). | | | | | | | | |  |  |  |  |  |
| "ZF domains" is the number of C2H2 zinc finger domains with all four zinc coordinating residues present and canonically spaced (C-x2-C-x12-H-x3-H). | | | | | | | | |  |  |  |  |  |
| "Other domains" are K (KRAB domain), S (SCAN domain), SSX (SSX domain), cK (cryptic KRAB domain), cS (cryptic SCAN domain). Domains are listed in order of appearance in the predicted protein. "cryptic" domains are cases in which a KRAB or SCAN domain is present and well-positioned in genomic DNA for being part of the gene, but no currently known transcripts include the domain in-frame with the ZF coding exon. In many cases these domains are present and similarly positioned in other species, suggesting that they are or were once part of the ZF gene. | | | | | | | | |  |  |  |  |  |
| "Human chr cluster" was used internally in this work and is provided for context. They don't necessarily correspond to published cluster names. | | | | | | | | |  |  |  |  |  |
| "present hand-assembled" means that an ortholog could not be found in the reference genome assembly but was obtained by tblastn searches of trace archive sequence data and local assembly of matching reads. | | | | | | | | |  |  |  |  |  |
| "absent inc TA" means that an ortholog failed to be found even in trace archive searches (see previous comment). | | | | | | | | |  |  |  |  |  |
| "absent inc syntenic DNA" means that additional manual searching of DNA in the syntenic region failed to identify candidate tandem ZF exons. | | | | | | | | |  |  |  |  |  |
| "absent inc syntenic DNA tree" means that one or more tandem ZF exons were found in the syntenic region but trees failed to support orthology. This pattern is expected to arise when local duplication of other nearby ZF genes occurs in a specific species. | | | | | | | | |  |  |  |  |  |
| Some genes and pseudogenes not included in our analysis are shown (colored brick) because they are present in the genome assembly and are potentially confusing when viewing these regions. | | | | | | | | |  |  |  |  |  |
| Gene pairs and groups that were too similar to assign high confidence orthologs for are colored in orange. They correspond to the genes in parentheses in Figure 3, where their origin is given according to copy number. | | | | | | | | |  |  |  |  |  |
