# Supplementary material for: 近世史部会--笹本正治「近世の鋳物師と真継家」,塚田孝「三都の非人と非人集団」 (1984年度歴史学研究会大会報告批判)
Source: HighWire-hosted journal article supplement (doi:10.1101/gr.121749.111), 1984-12-01
Supplement: Table_S6.docx [file Table_S6.docx]

| **Table S6. Example of endogenous retrovirus sites in human shared with other primates** | | | | |
| --- | --- | --- | --- | --- |
|  |  |  |  |  |
| human element (*HERVS71A-int* associated, hg19 coordinates) | chimpanzee | orangutan | macaque | marmoset |
| chr10:100890796-100890241|LTR6B | present | absent | absent | absent |
| chr10:111067289-111066777|LTR6B | present | present | absent | absent |
| chr10:38223747-38224257|LTR6A | present | present | present | absent |
| chr10:46972384-46972918|LTR6A | present | synteny_unclear | absent | absent |
| chr10:54706667-54706149|LTR6A | present | present | absent | absent |
| chr10:54715870-54715349|LTR6A | present | present | absent | absent |
| chr10:81746407-81746886|LTR6A | synteny_unclear | synteny_unclear | synteny_unclear | synteny_unclear |
| chr10:82177341-82176693|LTR6A | present | absent | absent | absent |
| chr10:93792890-93793456|LTR6A | present | present | present | absent |
| chr10:95206968-95207488|LTR6A | present | present | absent | absent |
| chr11:107705041-107704398|LTR6A | present | absent | absent | absent |
| chr11:125555225-125555763|LTR6A | present | absent | absent | absent |
| chr11:3531129-3530578|LTR6B | synteny_unclear | synteny_unclear | absent | absent |
| chr11:3538019-3537465|LTR6B | present | synteny_unclear | absent | absent |
| chr11:55824223-55823566|LTR6A | synteny_unclear | synteny_unclear | absent | absent |
| chr11:62329211-62329853|LTR6A | synteny_unclear | present | absent | absent |
| chr11:6302013-6302514|LTR6B | present | present | absent | absent |
| chr11:67650086-67649537|LTR6B | synteny_unclear | synteny_unclear | absent | absent |
| chr11:67656986-67656430|LTR6B | synteny_unclear | synteny_unclear | absent | absent |
| chr11:71417032-71417585|LTR6B | present | synteny_unclear | absent | absent |
| chr11:71423923-71424472|LTR6B | synteny_unclear | synteny_unclear | absent | absent |
| chr11:86134540-86135088|LTR6B | present | present | absent | absent |
| chr11:97507795-97508444|LTR6A | present | absent | absent | absent |
| chr12:110339169-110339732|LTR6A | present | present | synteny_unclear | absent |
| chr12:132109853-132110355|LTR6B | present | present | absent | synteny_unclear |
| chr12:18348592-18348055|LTR6A | present | present | present | absent |
| chr12:22854469-22853901|LTR6B | present | present | absent | synteny_unclear |
| chr12:34581597-34580989|LTR6A | synteny_unclear | synteny_unclear | synteny_unclear | synteny_unclear |
| chr12:47595331-47594771|LTR6B | present | present | absent | absent |
| chr12:8470637-8470084|LTR6B | present | synteny_unclear | absent | absent |
| chr12:8477521-8476967|LTR6B | present | synteny_unclear | absent | absent |
| chr12:9476133-9475585|LTR6A | present | present | absent | absent |
| chr12:96139770-96140328|LTR6B | present | present | absent | absent |
| chr13:19327449-19327996|LTR6A | synteny_unclear | synteny_unclear | synteny_unclear | synteny_unclear |
| chr13:19346763-19347312|LTR6A | present | synteny_unclear | absent | synteny_unclear |
| chr13:19366076-19366624|LTR6A | present | synteny_unclear | synteny_unclear | synteny_unclear |
| chr13:19495650-19495087|LTR6A | present | present | absent | absent |
| chr13:38450041-38450598|LTR6B | present | present | absent | absent |
| chr13:71384587-71384024|LTR6A | present | present | absent | absent |
| chr13:82954205-82954760|LTR6B | present | synteny_unclear | absent | absent |
| chr14:101561236-101561780|LTR6B | present | present | absent | absent |
| chr14:102531063-102531616|LTR6B | present | present | absent | absent |
| chr14:106640932-106640286|LTR6A | present | absent | synteny_unclear | absent |
| chr14:106654310-106653662|LTR6A | synteny_unclear | synteny_unclear | synteny_unclear | synteny_unclear |
| chr14:106664115-106663467|LTR6A | synteny_unclear | synteny_unclear | synteny_unclear | synteny_unclear |
| chr14:106992899-106992339|LTR6A | absent | present | absent | synteny_unclear |
| chr14:35817116-35817671|LTR6B | present | present | absent | absent |
| chr14:44850863-44850310|LTR6B | present | absent | absent | absent |
| chr14:55743714-55743207|LTR6B | present | present | absent | absent |
| chr14:63130153-63129610|LTR6A | present | present | absent | absent |
| chr14:86722121-86722668|LTR6B | present | absent | absent | absent |
| chr14:88280563-88281118|LTR6B | present | present | absent | absent |
| chr15:20177411-20176765|LTR6A | present | absent | synteny_unclear | absent |
| chr15:20450477-20450995|LTR6A | synteny_unclear | present | present | absent |
| chr15:25029972-25029421|LTR6A | present | present | present | synteny_unclear |
| chr15:26878574-26879134|LTR6B | present | present | absent | absent |
| chr15:29509615-29509086|LTR6B | present | present | synteny_unclear | synteny_unclear |
| chr15:45764452-45765098|LTR6A | present | present | absent | absent |
| chr15:54102492-54103003|LTR6B | present | present | absent | absent |
| chr15:89081365-89081872|LTR6B | present | synteny_unclear | absent | absent |
| chr15:89088953-89089461|LTR6B | present | present | absent | absent |
| chr16:10355724-10355196|LTR6A | present | present | present | absent |
| chr16:33408368-33407851|LTR6A | present | present | present | absent |
| chr16:34502539-34501989|LTR6A | present | synteny_unclear | synteny_unclear | synteny_unclear |
| chr16:34511447-34510899|LTR6A | present | synteny_unclear | synteny_unclear | synteny_unclear |
| chr16:34549159-34549806|LTR6A | present | synteny_unclear | synteny_unclear | absent |
| chr16:35051086-35051598|LTR6A | present | synteny_unclear | synteny_unclear | synteny_unclear |
| chr16:35131948-35131374|LTR6A | present | synteny_unclear | synteny_unclear | synteny_unclear |
| chr16:35136950-35136387|LTR6A | present | synteny_unclear | synteny_unclear | synteny_unclear |
| chr16:89678358-89677840|LTR6A | present | present | absent | absent |
| chr17:38853623-38854136|LTR6A | present | present | present | absent |
| chr17:5093990-5094515|LTR6A | present | present | absent | absent |
| chr17:66066341-66065822|LTR6A | present | synteny_unclear | absent | synteny_unclear |
| chr17:76268647-76268124|LTR6A | present | present | absent | absent |
| chr17:80132230-80132875|LTR6A | present | present | absent | absent |
| chr17:80169519-80170051|LTR6A | present | present | present | absent |
| chr17:8778733-8778213|LTR6B | present | present | synteny_unclear | synteny_unclear |
| chr18:14272199-14271649|LTR6A | synteny_unclear | synteny_unclear | absent | synteny_unclear |
| chr18:14291792-14291243|LTR6A | present | synteny_unclear | absent | synteny_unclear |
| chr18:14308137-14307587|LTR6A | present | synteny_unclear | absent | synteny_unclear |
| chr18:14327439-14326891|LTR6A | present | synteny_unclear | absent | synteny_unclear |
| chr18:14658639-14658077|LTR6A | present | present | absent | absent |
| chr18:34798516-34797872|LTR6A | present | present | absent | absent |
| chr18:41263043-41262394|LTR6A | present | absent | synteny_unclear | synteny_unclear |
| chr18:47926821-47927376|LTR6A | present | present | present | absent |
| chr18:47934537-47935100|LTR6A | present | present | present | absent |
| chr18:52058118-52057476|LTR6A | present | present | absent | absent |
| chr18:66611561-66610914|LTR6A | present | present | absent | absent |
| chr19:17525949-17526582|LTR6A | present | present | absent | synteny_unclear |
| chr19:20178850-20179402|LTR6A | present | synteny_unclear | synteny_unclear | synteny_unclear |
| chr19:20368653-20369162|LTR6B | present | synteny_unclear | synteny_unclear | absent |
| chr19:20472837-20473387|LTR6A | synteny_unclear | synteny_unclear | absent | synteny_unclear |
| chr19:20482162-20482803|LTR6A | synteny_unclear | synteny_unclear | absent | synteny_unclear |
| chr19:21871507-21871002|LTR6B | synteny_unclear | synteny_unclear | synteny_unclear | synteny_unclear |
| chr19:21880758-21880252|LTR6A | synteny_unclear | synteny_unclear | synteny_unclear | synteny_unclear |
| chr19:22039891-22039252|LTR6A | synteny_unclear | synteny_unclear | synteny_unclear | synteny_unclear |
| chr19:23363101-23362546|LTR6B | present | synteny_unclear | synteny_unclear | synteny_unclear |
| chr19:23369633-23369079|LTR6B | present | synteny_unclear | synteny_unclear | synteny_unclear |
| chr19:23460781-23460261|LTR6A | present | present | absent | synteny_unclear |
| chr19:33487251-33487772|LTR6A | present | present | present | absent |
| chr19:35044137-35043621|LTR6B | present | synteny_unclear | present | absent |
| chr19:35052244-35051736|LTR6B | present | present | present | absent |
| chr19:35212838-35213393|LTR6A | present | present | absent | synteny_unclear |
| chr19:35218139-35218692|LTR6A | present | present | absent | synteny_unclear |
| chr19:36816331-36815775|LTR6B | present | present | absent | absent |
| chr19:36821945-36821387|LTR6B | present | synteny_unclear | absent | absent |
| chr19:38046200-38045648|LTR6B | present | present | absent | absent |
| chr19:46774113-46773564|LTR6A | present | present | absent | synteny_unclear |
| chr19:49333329-49333886|LTR6A | present | present | absent | synteny_unclear |
| chr19:51252881-51253392|LTR6A | present | present | synteny_unclear | absent |
| chr19:53025074-53024564|LTR6A | present | present | absent | absent |
| chr19:54278219-54277666|LTR6B | present | present | synteny_unclear | synteny_unclear |
| chr19:56858951-56858407|LTR6A | present | present | synteny_unclear | synteny_unclear |
| chr19:58036941-58037457|LTR6A | present | present | absent | absent |
| chr19:58342686-58342111|LTR6B | synteny_unclear | present | synteny_unclear | absent |
| chr19:58398879-58399520|LTR6A | present | present | absent | absent |
| chr19:58525790-58525229|LTR6A | present | present | synteny_unclear | synteny_unclear |
| chr19:58768310-58767670|LTR6A | present | present | synteny_unclear | synteny_unclear |
| chr19:6656653-6656146|LTR6A | present | present | synteny_unclear | absent |
| chr19:6661734-6661226|LTR6A | present | present | synteny_unclear | absent |
| chr19:8268463-8267906|LTR6B | synteny_unclear | present | absent | absent |
| chr1:100424865-100425382|LTR6B | present | absent | absent | absent |
| chr1:105031239-105031888|LTR6A | present | present | absent | absent |
| chr1:142622440-142621881|LTR6A | present | present | synteny_unclear | absent |
| chr1:142887366-142887921|LTR6A | synteny_unclear | present | synteny_unclear | absent |
| chr1:143120492-143119936|LTR6A | synteny_unclear | present | synteny_unclear | absent |
| chr1:143463869-143464431|LTR6A | synteny_unclear | present | synteny_unclear | absent |
| chr1:146710445-146711001|LTR6B | present | present | absent | absent |
| chr1:152994433-152994957|LTR6B | present | present | absent | synteny_unclear |
| chr1:158976529-158975920|LTR6A | present | present | absent | absent |
| chr1:188718447-188719093|LTR6A | present | absent | synteny_unclear | absent |
| chr1:231120898-231120257|LTR6A | present | present | absent | absent |
| chr1:231348345-231347703|LTR6A | present | synteny_unclear | absent | absent |
| chr1:25576939-25576424|LTR6A | present | synteny_unclear | present | absent |
| chr1:25649760-25649198|LTR6A | synteny_unclear | present | absent | absent |
| chr1:25694673-25695235|LTR6A | synteny_unclear | present | absent | absent |
| chr1:28691476-28691999|LTR6A | present | present | absent | absent |
| chr1:33110065-33109510|LTR6B | present | present | absent | absent |
| chr1:33276804-33277366|LTR6A | present | present | present | absent |
| chr1:33392515-33391936|LTR6A | present | present | absent | absent |
| chr1:69778872-69778311|LTR6B | present | present | absent | synteny_unclear |
| chr1:78665752-78666312|LTR6B | present | present | absent | absent |
| chr1:89664104-89663546|LTR6A | present | present | synteny_unclear | absent |
| chr20:23849025-23849581|LTR6A | present | present | absent | absent |
| chr20:31562916-31563473|LTR6B | present | present | absent | absent |
| chr20:43152417-43152968|LTR6A | present | present | absent | absent |
| chr20:45828570-45829129|LTR6B | present | present | absent | absent |
| chr20:5957499-5956976|LTR6A | present | present | absent | absent |
| chr21:10167504-10166949|LTR6A | present | synteny_unclear | synteny_unclear | absent |
| chr21:14871382-14871944|LTR6A | present | present | absent | absent |
| chr21:15230647-15231196|LTR6A | present | synteny_unclear | synteny_unclear | synteny_unclear |
| chr21:15249973-15250522|LTR6A | present | synteny_unclear | absent | synteny_unclear |
| chr21:15269515-15270064|LTR6A | present | synteny_unclear | synteny_unclear | synteny_unclear |
| chr21:15476882-15477436|LTR6A | present | present | present | synteny_unclear |
| chr21:41950001-41949475|LTR6B | present | present | absent | absent |
| chr21:43134644-43135153|LTR6B | present | present | absent | absent |
| chr21:43497931-43497403|LTR6B | present | present | absent | absent |
| chr21:44356555-44357110|LTR6B | present | present | synteny_unclear | absent |
| chr21:44389431-44389955|LTR6A | present | present | absent | absent |
| chr21:9651510-9650948|LTR6A | synteny_unclear | present | synteny_unclear | absent |
| chr21:9964815-9965373|LTR6A | synteny_unclear | present | synteny_unclear | absent |
| chr22:23709380-23710023|LTR6A | absent | absent | absent | absent |
| chr22:29828058-29828605|LTR6A | synteny_unclear | present | synteny_unclear | synteny_unclear |
| chr22:32536302-32535793|LTR6B | present | present | synteny_unclear | synteny_unclear |
| chr22:39507322-39507834|LTR6A | present | present | present | absent |
| chr22:39510238-39510870|LTR6A | present | present | absent | absent |
| chr22:42944341-42943830|LTR6B | present | present | absent | synteny_unclear |
| chr2:101956034-101955389|LTR6A | present | present | absent | absent |
| chr2:111445542-111446192|LTR6A | present | present | absent | absent |
| chr2:113610045-113609503|LTR6A | absent | present | absent | absent |
| chr2:116198709-116198061|LTR6A | present | present | absent | absent |
| chr2:117025803-117026383|LTR6A | present | absent | absent | absent |
| chr2:124439219-124439746|LTR6B | present | present | absent | absent |
| chr2:124448573-124449097|LTR6B | present | present | absent | absent |
| chr2:155434813-155434267|LTR6B | present | present | absent | absent |
| chr2:201991318-201990761|LTR6B | present | present | absent | absent |
| chr2:212457187-212456644|LTR6B | present | present | absent | absent |
| chr2:224581508-224582024|LTR6A | present | present | present | absent |
| chr2:229372380-229371828|LTR6A | present | present | present | absent |
| chr2:232762713-232762192|LTR6A | present | present | absent | absent |
| chr2:240966814-240966265|LTR6B | present | present | synteny_unclear | absent |
| chr2:35402089-35401448|LTR6A | present | absent | absent | absent |
| chr2:47925177-47924606|LTR6B | present | present | absent | synteny_unclear |
| chr2:95872705-95872061|LTR6A | present | present | absent | absent |
| chr2:98328959-98328411|LTR6A | present | present | present | absent |
| chr2:99698420-99698995|LTR6A | present | present | absent | absent |
| chr3:100320708-100321265|LTR6B | present | present | absent | absent |
| chr3:101350889-101351441|LTR6A | present | absent | absent | absent |
| chr3:101360353-101360900|LTR6A | present | absent | absent | absent |
| chr3:125550783-125551332|LTR6B | present | synteny_unclear | absent | absent |
| chr3:125557645-125558202|LTR6B | present | synteny_unclear | absent | absent |
| chr3:128394626-128395270|LTR6A | present | present | absent | absent |
| chr3:129896078-129895527|LTR6B | present | synteny_unclear | absent | absent |
| chr3:129902957-129902406|LTR6B | present | synteny_unclear | absent | absent |
| chr3:146123349-146122793|LTR6B | present | present | absent | absent |
| chr3:146129944-146129393|LTR6B | present | present | absent | absent |
| chr3:164052280-164051797|LTR6B | present | present | absent | absent |
| chr3:164059685-164059175|LTR6B | present | present | absent | absent |
| chr3:179399538-179399011|LTR6A | present | present | absent | absent |
| chr3:182831731-182832238|LTR6B | present | present | absent | absent |
| chr3:183152587-183152034|LTR6B | present | synteny_unclear | absent | absent |
| chr3:184629471-184630050|LTR6A | present | absent | absent | absent |
| chr3:186614846-186615492|LTR6A | present | present | absent | absent |
| chr3:186728304-186728859|LTR6B | present | present | absent | absent |
| chr3:189851525-189852077|LTR6B | present | absent | absent | absent |
| chr3:191429498-191429077|LTR6B | present | absent | absent | absent |
| chr3:45727313-45727867|LTR6B | present | present | absent | absent |
| chr3:47523611-47523051|LTR6A | present | absent | absent | absent |
| chr3:47883559-47884208|LTR6A | present | present | absent | absent |
| chr3:75549947-75549388|LTR6B | synteny_unclear | synteny_unclear | absent | absent |
| chr3:75556618-75556067|LTR6B | synteny_unclear | synteny_unclear | absent | absent |
| chr3:75736041-75736563|LTR6A | present | synteny_unclear | synteny_unclear | absent |
| chr3:75830708-75831270|LTR6A | synteny_unclear | synteny_unclear | absent | absent |
| chr4:131717271-131717786|LTR6A | present | present | absent | absent |
| chr4:171152279-171151725|LTR6A | present | present | absent | absent |
| chr4:172078888-172079444|LTR6A | present | present | absent | absent |
| chr4:25522521-25523047|LTR6A | present | present | present | absent |
| chr4:296625-297180|LTR6B | present | present | absent | synteny_unclear |
| chr4:4032525-4031968|LTR6B | present | synteny_unclear | absent | absent |
| chr4:4039301-4038852|LTR6B | present | synteny_unclear | absent | absent |
| chr4:49166940-49166386|LTR6A | synteny_unclear | present | synteny_unclear | absent |
| chr4:57471686-57472332|LTR6A | present | present | absent | absent |
| chr4:7416827-7416180|LTR6A | present | present | absent | absent |
| chr4:8431465-8430908|LTR6B | synteny_unclear | synteny_unclear | absent | absent |
| chr4:9070224-9070673|LTR6B | present | synteny_unclear | absent | absent |
| chr4:9077013-9077564|LTR6B | synteny_unclear | present | absent | absent |
| chr4:9601453-9602010|LTR6B | present | synteny_unclear | absent | absent |
| chr4:9608319-9608867|LTR6B | synteny_unclear | synteny_unclear | absent | absent |
| chr5:146421392-146421947|LTR6B | present | present | absent | absent |
| chr5:154319232-154318673|LTR6B | present | present | absent | absent |
| chr5:175599262-175599860|LTR6A | present | present | synteny_unclear | absent |
| chr5:179039750-179040290|LTR6A | present | present | present | absent |
| chr5:21165034-21165591|LTR6B | present | present | absent | absent |
| chr5:43468635-43468072|LTR6B | present | present | absent | absent |
| chr5:55296292-55295766|LTR6B | present | present | absent | absent |
| chr5:79407568-79407007|LTR6A | present | present | absent | absent |
| chr5:95043590-95043041|LTR6B | present | present | absent | absent |
| chr6:10751076-10750516|LTR6B | synteny_unclear | present | absent | absent |
| chr6:137972360-137972879|LTR6A | present | present | absent | absent |
| chr6:153003239-153003791|LTR6B | present | present | absent | absent |
| chr6:158615809-158615267|LTR6A | present | present | absent | absent |
| chr6:161311953-161311394|LTR6B | present | present | absent | absent |
| chr6:26492083-26491532|LTR6A | present | present | present | synteny_unclear |
| chr6:27015838-27015285|LTR6B | present | synteny_unclear | synteny_unclear | synteny_unclear |
| chr6:27738868-27738225|LTR6A | present | present | absent | absent |
| chr6:28734497-28733956|LTR6A | present | present | absent | synteny_unclear |
| chr6:28744279-28743737|LTR6A | absent | present | absent | synteny_unclear |
| chr6:2990892-2991443|LTR6A | present | present | absent | synteny_unclear |
| chr6:68891267-68890619|LTR6A | present | absent | absent | absent |
| chr6:87182745-87183268|LTR6B | present | present | absent | absent |
| chr6:87190855-87191382|LTR6B | present | present | absent | absent |
| chr7:101973413-101973924|LTR6A | present | synteny_unclear | absent | absent |
| chr7:134233231-134233801|LTR6A | present | absent | absent | synteny_unclear |
| chr7:134242125-134242648|LTR6A | present | absent | absent | synteny_unclear |
| chr7:138777171-138776613|LTR6B | present | present | absent | absent |
| chr7:148349484-148348968|LTR6B | present | present | present | absent |
| chr7:15094010-15094581|LTR6B | present | present | absent | absent |
| chr7:151120396-151119837|LTR6B | present | present | absent | absent |
| chr7:153128513-153129067|LTR6B | present | present | absent | absent |
| chr7:23764110-23763469|LTR6A | synteny_unclear | present | absent | absent |
| chr7:29676478-29675988|LTR6A | present | absent | absent | absent |
| chr7:29686017-29685494|LTR6A | present | absent | synteny_unclear | absent |
| chr7:32643356-32642837|LTR6B | present | absent | absent | absent |
| chr7:37141456-37140937|LTR6A | present | present | absent | absent |
| chr7:38371844-38372400|LTR6B | present | present | absent | absent |
| chr7:7028546-7027990|LTR6B | present | synteny_unclear | absent | absent |
| chr7:7035336-7034887|LTR6B | synteny_unclear | synteny_unclear | absent | absent |
| chr7:95471989-95471482|LTR6B | present | present | absent | absent |
| chr8:113820577-113821133|LTR6A | present | present | absent | absent |
| chr8:12377968-12377417|LTR6B | synteny_unclear | synteny_unclear | absent | absent |
| chr8:12384732-12384288|LTR6B | present | synteny_unclear | absent | absent |
| chr8:138032023-138031465|LTR6B | present | present | absent | absent |
| chr8:139094676-139095234|LTR6B | present | present | absent | absent |
| chr8:145921457-145920901|LTR6B | present | present | absent | absent |
| chr8:17029316-17029872|LTR6B | present | present | absent | absent |
| chr8:29177067-29177624|LTR6B | present | present | absent | absent |
| chr8:29952323-29951804|LTR6A | present | present | present | absent |
| chr8:37929590-37929027|LTR6A | present | present | absent | absent |
| chr8:39801881-39802434|LTR6B | present | present | absent | absent |
| chr8:42688383-42687872|LTR6B | present | present | absent | absent |
| chr8:43406992-43406468|LTR6A | synteny_unclear | synteny_unclear | synteny_unclear | synteny_unclear |
| chr8:43416380-43415853|LTR6A | synteny_unclear | synteny_unclear | synteny_unclear | synteny_unclear |
| chr8:7006143-7005694|LTR6B | present | synteny_unclear | synteny_unclear | synteny_unclear |
| chr8:75518671-75518113|LTR6B | present | present | absent | absent |
| chr8:7995968-7996412|LTR6B | present | synteny_unclear | absent | absent |
| chr8:8002727-8003278|LTR6B | synteny_unclear | synteny_unclear | absent | absent |
| chr8:82512440-82513088|LTR6A | present | present | synteny_unclear | absent |
| chr8:90191371-90190820|LTR6A | present | present | absent | absent |
| chr8:90748541-90749049|LTR6B | present | present | absent | absent |
| chr8:98774236-98774759|LTR6A | present | present | present | absent |
| chr8:98790591-98791126|LTR6A | present | present | present | absent |
| chr9:100462389-100461867|LTR6B | present | present | absent | absent |
| chr9:107021006-107021569|LTR6A | present | present | absent | absent |
| chr9:115827445-115826798|LTR6A | synteny_unclear | present | absent | absent |
| chr9:115832893-115832246|LTR6A | synteny_unclear | present | absent | absent |
| chr9:115838339-115837692|LTR6A | synteny_unclear | present | absent | absent |
| chr9:115843781-115843134|LTR6A | synteny_unclear | present | absent | absent |
| chr9:115849227-115848580|LTR6A | synteny_unclear | present | absent | absent |
| chr9:130229829-130229304|LTR6A | present | present | present | absent |
| chr9:138331434-138332022|LTR6B | synteny_unclear | synteny_unclear | synteny_unclear | synteny_unclear |
| chr9:139883665-139884191|LTR6A | present | absent | absent | absent |
| chr9:66466178-66466706|LTR6A | synteny_unclear | present | synteny_unclear | absent |
| chr9:68401010-68400482|LTR6A | present | present | absent | synteny_unclear |
| chrX:102640515-102639964|LTR6B | present | present | absent | absent |
| chrX:119947885-119948530|LTR6A | present | present | absent | absent |
| chrX:140151924-140151404|LTR6A | present | synteny_unclear | present | absent |
| chrX:140617734-140618254|LTR6A | present | synteny_unclear | present | absent |
| chrX:146083937-146084488|LTR6A | present | present | absent | absent |
| chrX:16029418-16028891|LTR6B | present | synteny_unclear | absent | absent |
| chrX:2694702-2694151|LTR6B | synteny_unclear | synteny_unclear | absent | absent |
| chrX:2809097-2808549|LTR6B | synteny_unclear | present | synteny_unclear | absent |
| chrX:34132682-34132157|LTR6A | present | present | absent | absent |
| chrX:438288-437735|LTR6B | present | present | synteny_unclear | synteny_unclear |
| chrX:52925530-52925009|LTR6A | present | synteny_unclear | synteny_unclear | absent |
| chrX:52988503-52989025|LTR6A | present | synteny_unclear | absent | absent |
| chrX:55893491-55892938|LTR6B | present | present | absent | absent |
| chrX:61800-62272|LTR6B | synteny_unclear | synteny_unclear | synteny_unclear | synteny_unclear |
| fraction shared sites: | 0.985 | 0.881 | 0.122 | 0.000 |
| number of interpretable sites: | 265 | 236 | 254 | 247 |
