# Supplementary material for: 近世史部会--笹本正治「近世の鋳物師と真継家」,塚田孝「三都の非人と非人集団」 (1984年度歴史学研究会大会報告批判)
Source: HighWire-hosted journal article supplement (doi:10.1101/gr.121749.111), 1984-12-01
Supplement: Table_S7.docx [file Table_S7.docx]

| **Table S7. Correlation between appearance of new endogenous retroviruses and new tandem ZF genes in primates** | | | | | |
| --- | --- | --- | --- | --- | --- |
|  |  |  |  |  |  |
| test | description | R-squared | P-value |  |  |
| 1 | ZF CNV excluded, ambiguous retroelements split evenly | 0.962 | 0.0005 |  |  |
| 2 | ZF CNV included, ambiguous retroelements split evenly | 0.948 | 0.0010 |  |  |
| 3 | ZF CNV excluded, ambiguous retroelements to Simian | 0.944 | 0.0012 |  |  |
| 4 | ZF CNV excluded, ambiguous retroelements to Catarrhine | 0.953 | 0.0008 |  |  |
| 5 | ZF CNV included, ambiguous retroelements to Simian | 0.925 | 0.0021 |  |  |
| 6 | ZF CNV included, ambiguous retroelements to Catarrhine | 0.944 | 0.0012 |  |  |
| 7 | ZF CNV excluded, ambiguous retroelements removed | 0.957 | 0.0007 |  |  |
| 8 | ZF CNV included, ambiguous retroelements removed | 0.941 | 0.0013 |  |  |
