# Supplementary material for: 近世史部会--笹本正治「近世の鋳物師と真継家」,塚田孝「三都の非人と非人集団」 (1984年度歴史学研究会大会報告批判)
Source: HighWire-hosted journal article supplement (doi:10.1101/gr.121749.111), 1984-12-01
Supplement: Table_S8.docx [file Table_S8.docx]

| **Table S8. codeml analysis of species-specific ZF gene expansions** | | | | | | | | | | | | | | | | |  |
| --- | --- | --- | --- | --- | --- | --- | --- | --- | --- | --- | --- | --- | --- | --- | --- | --- | --- |
|  |  |  |  |  |  |  |  |  |  |  |  |  |  |  |  |  |  |
|  |  |  |  | Model 7 | Model 8, start omega 0.3 | | Model 8, start omega 1.0 | | Model 8, start omega 3.4 | | Model 8A (fixed 11th class omega) | | Model 7 vs 8 stats | | Model 8 vs 8A stats | |  |
| sequence file | sequence number | mean SeqLen (codons) | total tree length | log lk | log lk | 11th class omega | log lk | 11th class omega | log lk | 11th class omega | log lk | 11th class omega | 2 delta ML | P val | 2 delta ML | P val | notes |
| acar_expansion1_trimmed.fasta | 11 | 489 | 0.59 | -4272.06 | -4220.83 | 6.71 | -4220.75 | 8.07 | -4220.83 | 6.71 | -4270.32 | 1.00 | 102.62 | < 1*10-16 | 99.13 | < 1*10-16 |  |
| acar_expansion2_trimmed.fasta | 12 | 378 | 1.91 | -5379.07 | -5311.61 | 6.41 | -5311.61 | 6.41 | -5311.61 | 6.41 | -5378.07 | 1.00 | 134.90 | < 1*10-16 | 132.91 | < 1*10-16 |  |
| acar_expansion3_trimmed.fasta | 11 | 374 | 1.55 | -5725.31 | -5682.97 | 4.39 | -5682.97 | 4.39 | -5682.97 | 4.39 | -5724.24 | 1.00 | 84.67 | < 1*10-16 | 82.54 | < 1*10-16 |  |
| acar_expansion4_trimmed.fasta | 14 | 378 | 1.79 | -5225.22 | -5150.10 | 4.92 | -5150.10 | 4.92 | -5150.10 | 4.92 | -5224.66 | 1.00 | 150.24 | < 1*10-16 | 149.13 | < 1*10-16 |  |
| cpor_expansion1_trimmed.fasta | 12 | 343 | 1.47 | -4429.05 | -4410.81 | 3.79 | -4410.81 | 3.79 | -4410.81 | 3.79 | -4427.49 | 1.00 | 36.48 | 1.20*10-08 | 33.36 | 7.66*10-09 |  |
| cpor_expansion2_trimmed.fasta | 11 | 300 | 1.04 | -2992.13 | -2988.35 | 1.83 | -2988.35 | 1.83 | -2988.35 | 1.83 | -2991.64 | 1.00 | 7.57 | 2.27*10-02 | 6.58 | 1.03*10-02 | marginally significant |
| cpor_expansion3_trimmed.fasta | 10 | 423 | 0.97 | -3942.95 | -3917.60 | 3.80 | -3917.60 | 3.80 | -3917.60 | 3.80 | -3939.31 | 1.00 | 50.70 | 9.79*10-12 | 43.43 | 4.39*10-11 |  |
| cpor_expansion4_trimmed.fasta | 11 | 328 | 0.61 | -2615.39 | -2603.41 | 13.62 | -2603.41 | 13.62 | -2603.41 | 13.62 | -2615.19 | 1.00 | 23.96 | 6.27*10-06 | 23.56 | 1.21*10-06 |  |
| ecab_expansion1_trimmed.fasta | 5 | 668 | 1.67 | -7173.65 | -7156.96 | 5.94 | -7156.96 | 5.94 | -7156.96 | 5.94 | -7169.97 | 1.00 | 33.37 | 5.67*10-08 | 26.02 | 3.38*10-07 |  |
| ecab_expansion2_trimmed.fasta | 11 | 494 | 3.54 | -8879.97 | -8871.57 | 2.24 | -8871.57 | 2.24 | -8871.57 | 2.24 | -8877.42 | 1.00 | 16.81 | 2.24*10-04 | 11.69 | 6.28*10-04 |  |
| ecab_expansion3_trimmed.fasta | 12 | 519 | 3.48 | -9521.96 | -9489.56 | 2.74 | -9489.56 | 2.74 | -9489.56 | 2.74 | -9512.44 | 1.00 | 64.79 | 8.55*10-15 | 45.76 | 1.34*10-11 |  |
| ecab_expansion4_trimmed.fasta | 9 | 304 | 3.43 | -5174.24 | -5171.94 | 1.58 | -5171.94 | 1.58 | -5171.94 | 1.58 | -5172.92 | 1.00 | 4.60 | 1.00*10-01 | 1.96 | 1.62*10-01 | not significant |
| lafr_expansion1_trimmed.fasta | 5 | 409 | 4.13 | -5608.42 | -5562.55 | 6.98 | -5562.55 | 6.98 | -5562.55 | 6.98 | -5596.13 | 1.00 | 91.75 | < 1*10-16 | 67.16 | 2.22*10-16 |  |
| lafr_expansion2_trimmed.fasta | 5 | 447 | 5.48 | -6723.91 | -6717.65 | 2.87 | -6717.65 | 2.87 | -6717.65 | 2.87 | -6721.60 | 1.00 | 12.51 | 1.92*10-03 | 7.90 | 4.94*10-03 |  |
| lafr_expansion3_trimmed.fasta | 9 | 322 | 10.69 | -8382.66 | -8381.64 | 1.31 | -8381.64 | 1.31 | -8381.64 | 1.31 | -8381.89 | 1.00 | 2.04 | 3.61*10-01 | 0.51 | 4.75*10-01 | not significant |
| lafr_expansion4_trimmed.fasta | 6 | 303 | 3.40 | -4374.47 | -4371.37 | 1.90 | -4371.37 | 1.90 | -4371.37 | 1.90 | -4372.82 | 1.00 | 6.20 | 4.50*10-02 | 2.88 | 8.97*10-02 | marginally significant |
| mdom_expansion1_trimmed.fasta | 16 | 401 | 6.08 | -10200.21 | -10079.30 | 2.60 | -10079.30 | 2.60 | -10079.30 | 2.60 | -10160.89 | 1.00 | 241.81 | < 1*10-16 | 163.17 | < 1*10-16 |  |
| mdom_expansion2_trimmed.fasta | 12 | 527 | 4.28 | -10828.78 | -10748.02 | 2.47 | -10748.02 | 2.47 | -10748.02 | 2.47 | -10803.94 | 1.00 | 161.53 | < 1*10-16 | 111.85 | < 1*10-16 |  |
| mdom_expansion3_trimmed.fasta | 16 | 415 | 1.37 | -5962.05 | -5906.91 | 5.94 | -5906.91 | 5.93 | -5906.91 | 5.93 | -5961.36 | 1.00 | 110.29 | < 1*10-16 | 108.89 | < 1*10-16 |  |
| olat_expansion1_trimmed.fasta | 16 | 276 | 3.97 | -5746.24 | -5663.94 | 3.71 | -5663.94 | 3.71 | -5663.94 | 3.71 | -5731.45 | 1.00 | 164.59 | < 1*10-16 | 135.02 | < 1*10-16 |  |
| olat_expansion2_trimmed.fasta | 13 | 284 | 2.89 | -5128.58 | -5082.73 | 3.22 | -5082.73 | 3.22 | -5082.73 | 3.22 | -5118.42 | 1.00 | 91.71 | < 1*10-16 | 71.38 | < 1*10-16 |  |
| olat_expansion3_trimmed.fasta | 11 | 224 | 1.95 | -2875.38 | -2856.85 | 2.68 | -2856.85 | 2.68 | -2856.85 | 2.68 | -2869.84 | 1.00 | 37.06 | 8.96*10-09 | 25.98 | 3.45*10-07 |  |
| olat_expansion4_trimmed.fasta | 8 | 207 | 1.63 | -2189.70 | -2184.73 | 2.29 | -2184.73 | 2.29 | -2184.73 | 2.29 | -2188.84 | 1.00 | 9.95 | 6.91*10-03 | 8.23 | 4.12*10-03 |  |
| pmar_expansion1_trimmed.fasta | 11 | 239 | 2.74 | -4444.79 | -4385.71 | 4.08 | -4385.71 | 4.08 | -4385.71 | 4.08 | -4439.62 | 1.00 | 118.17 | < 1*10-16 | 107.83 | < 1*10-16 |  |
| pmar_expansion2_trimmed.fasta | 15 | 321 | 2.58 | -5723.47 | -5586.83 | 5.35 | -5586.83 | 5.35 | -5586.83 | 5.35 | -5707.42 | 1.00 | 273.28 | < 1*10-16 | 241.19 | < 1*10-16 |  |
| pmar_expansion3_trimmed.fasta | 9 | 320 | 1.91 | -4221.30 | -4144.52 | 4.95 | -4144.52 | 4.95 | -4144.52 | 4.95 | -4220.24 | 1.00 | 153.56 | < 1*10-16 | 151.45 | < 1*10-16 |  |
| pmar_expansion4_trimmed.fasta | 13 | 213 | 3.44 | -3777.33 | -3676.02 | 4.84 | -3676.02 | 4.84 | -3676.02 | 4.84 | -3763.94 | 1.00 | 202.61 | < 1*10-16 | 175.83 | < 1*10-16 |  |
| rnor_expansion1_trimmed.fasta | 6 | 350 | 1.12 | -3202.64 | -3196.81 | 2.79 | -3196.81 | 2.79 | -3196.81 | 2.79 | -3200.13 | 1.00 | 11.65 | 2.95*10-03 | 6.64 | 9.97*10-03 |  |
| rnor_expansion2_trimmed.fasta | 21 | 452 | 3.57 | -10088.90 | -10048.26 | 3.43 | -10048.26 | 3.43 | -10048.26 | 3.43 | -10084.84 | 1.00 | 81.28 | < 1*10-16 | 73.17 | < 1*10-16 |  |
| rnor_expansion3_trimmed.fasta | 10 | 322 | 2.59 | -4857.44 | -4840.62 | 3.20 | -4840.62 | 3.20 | -4840.62 | 3.20 | -4855.48 | 1.00 | 33.63 | 4.98*10-08 | 29.71 | 5.02*10-08 |  |
| rnor_expansion4_trimmed.fasta | 7 | 364 | 0.67 | -3309.57 | -3308.40 | 1.69 | -3308.39 | 1.32 | -3308.40 | 1.69 | -3309.24 | 1.00 | 2.36 | 3.07*10-01 | 1.70 | 1.92*10-01 | not significant |
| tnig_expansion1_trimmed.fasta | 6 | 154 | 1.64 | -1859.03 | -1852.44 | 2.56 | -1852.44 | 2.56 | -1852.44 | 2.56 | -1858.28 | 1.00 | 13.16 | 1.39*10-03 | 11.68 | 6.32*10-04 |  |
| tnig_expansion2_trimmed.fasta | 4 | 202 | 1.02 | -1888.45 | -1880.57 | 6.12 | -1880.57 | 6.12 | -1880.57 | 6.12 | -1888.11 | 1.00 | 15.77 | 3.76*10-04 | 15.07 | 1.04*10-04 |  |
| trub_expansion1_trimmed.fasta | 8 | 235 | 1.25 | -3084.60 | -3067.65 | 5.01 | -3067.65 | 5.01 | -3067.65 | 5.01 | -3083.60 | 1.00 | 33.89 | 4.37*10-08 | 31.89 | 1.63*10-08 |  |
| trub_expansion2_trimmed.fasta | 7 | 179 | 1.07 | -2084.56 | -2071.30 | 21.82 | -2071.30 | 21.81 | -2071.30 | 21.79 | -2084.31 | 1.00 | 26.52 | 1.74*10-06 | 26.02 | 3.38*10-07 |  |
|  |  |  |  |  |  |  |  |  |  |  |  |  |  |  |  |  |  |
| Sequence files listed are available on request. Sequences were end trimmed to the first and last shared ZF domain before analysis to improve alignment quality. | | | | | | | | | | | | | | | | |  |
| Total tree length was derived from codeml output and is relevant to codeml power. | | | | | | | | | | | | | | | | |  |
| Model 7 allows 10 omega (dN/dS) classes constrained to be less than or equal to 1.0. | | | | | | | | | | | | | | | | |  |
| Model 8 is identical to model 7 except that it allows an 11th unconstrained omega class. | | | | | | | | | | | | | | | | |  |
| Model 8 was run with three different starting values for the 11th omega class in order to avoid local optima. | | | | | | | | | | | | | | | | |  |
| Model 8A is identical to model 8 except that the 11th omega class is fixed at 1.0. | | | | | | | | | | | | | | | | |  |
| Model 7 vs 8 stats were computed from twice the log likelihood difference between model 7 and the best of the three model 8 runs. The P-value was computed from the chi-square distribution with two degrees of freedom. | | | | | | | | | | | | | | | | |  |
| Model 8 vs 8A stats were computed from twice the log likelihood difference between model 8A and the best of the three model 8 runs. The P-value was computed from the chi-square distribution with one degree of freedom. | | | | | | | | | | | | | | | | |  |
| Runs with P-values greater than 0.05 are grayed and noted as not significant. | | | | | | | | | | | | | | | | |  |
