# Supplementary material for: 近世史部会--笹本正治「近世の鋳物師と真継家」,塚田孝「三都の非人と非人集団」 (1984年度歴史学研究会大会報告批判)
Source: HighWire-hosted journal article supplement (doi:10.1101/gr.121749.111), 1984-12-01
Supplement: Table_S9.docx [file Table_S9.docx]

| **Table S9. Summary of codeml branch-site results** | | | | | | |
| --- | --- | --- | --- | --- | --- | --- |
|  |  |  |  |  |  |  |
| human gene 1 | human gene 2 | foreground omega (model A) | number total sites | number selected sites | delta ML | P-val pos selection |
| ZNF836 | ZNF841 | 23.1 | 890 | 12 | 26.58 | 2.53*10-07 |
| ZIK1 | ZNF416 | 107.1 | 583 | 39 | 22.56 | 2.04*10-06 |
| ZNF226 | ZNF234 | 12.4 | 729 | 11 | 17.67 | 2.63*10-05 |
| ZNF17 | ZNF749 | 9.8 | 743 | 7 | 14.87 | 0.0001 |
| ZNF528 | LLNL759 | 18.1 | 545 | 15 | 14.06 | 0.0002 |
| ZNF600 | ZNF611 | 220.9 | 728 | 20 | 12.11 | 0.0005 |
| ZNF431 | ZNF714 | 11.5 | 508 | 4 | 9.17 | 0.0025 |
| ZNF273 | ZNF680 | 3.6 | 460 | 5 | 6.02 | 0.0005 |
| ZNF736 | ZNF727 | 7.3 | 434 | 5 | 5.14 | 0.0013 |
| ZNF33B | ZNF33A | 119.0 | 730 | 19 | 4.90 | 0.0018 |
| ZNF675 | ZNF681 | 4.9 | 573 | 0 | 4.80 | 0.0019 |
| ZNF382 | ZNF567 | 2.2 | 575 | 23 | 4.68 | 0.0022 |
| ZNF764 | ZNF747 | 442.8 | 305 | 13 | 4.62 | 0.0024 |
| ZNF264 | ZNF805 | 122.3 | 546 | 21 | 3.96 | 0.0049 |
| ZFP112 | ZNF45 | 2.0 | 420 | 36 | 3.94 | 0.0050 |
| ZNF468 | ZNF28 | 18.4 | 681 | 0 | 3.78 | 0.0059 |
| ZNF773 | ZNF419 | 184.7 | 447 | 11 | 3.28 | 0.0104 |
| ZNF124 | ZNF670 | 2.5 | 335 | 0 | 2.99 | 0.0144 |
| ZNF160 | ZNF665 | 2.5 | 731 | 0 | 2.80 | 0.0180 |
| ZFP30 | ZFP82 | 2.4 | 457 | 10 | 2.55 | 0.0240 |
| ZNF558 | ZNF557 | 2.5 | 288 | 11 | 2.37 | 0.0296 |
| ZNF679 | ZNF716 | 2.8 | 415 | 0 | 2.16 | 0.0377 |
| ZNF41 | ZNF484 | 2.4 | 799 | NA | 1.51 | NS |
| ZNF81 | ZNF175 | 1.6 | 614 | NA | 1.50 | NS |
| ZNF354A | ZNF354B | 3.1 | 528 | NA | 1.24 | NS |
| ZNF136 | ZNF564 | 1.3 | 490 | NA | 0.69 | NS |
| ZNF133 | ZNF343 | 1.2 | 604 | NA | 0.31 | NS |
| ZNF585A | ZNF585B | 2.1 | 672 | NA | 0.23 | NS |
| ZNF570 | ZNF583 | 1.3 | 493 | NA | 0.19 | NS |
| ZNF799 | ZNF443 | 1.8 | 608 | NA | 0.18 | NS |
| ZNF619 | ZNF621 | 1.1 | 482 | NA | 0.03 | NS |
| ZNF383 | ZNF829 | 1.1 | 399 | NA | 0.00 | NS |
| ZNF100 | ZNF430 | 1.0 | 463 | NA | 0.00 | NS |
| ZNF568 | ZNF569 | 1.0 | 608 | NA | 0.00 | NS |
|  |  |  |  |  |  |  |
| For each duplicate gene pair, key output values from the branch-site model of codeml are listed, using selection model A and control model A1 (see Materials and Methods and PAML 3.15 documentation for details). Foreground omega is the additional foreground dN/dS class assigned by codeml run with model A. Number sites - the total number of sites in the alignment. Number selected sites - the number of sites with evidence for positive selection with P >= 0.95 (Bayes-Empirical-Bayes output). Delta ML - the difference in log-likelihoods for model A and model A1. P-val pos selection – the P-value for positive selection, computed by a chi-square test from twice delta ML with one degree of freedom. Values are not corrected for multiple testing. In cases where the P-value was not significant (P > 0.05 or NS, not significant), the number of selected sites is labeled NA (not applicable). | | | | | | |
