# Supplementary material for: 近世史部会--笹本正治「近世の鋳物師と真継家」,塚田孝「三都の非人と非人集団」 (1984年度歴史学研究会大会報告批判)
Source: HighWire-hosted journal article supplement (doi:10.1101/gr.121749.111), 1984-12-01
Supplement: Table_S10.docx [file Table_S10.docx]

| **Table S10. Specific sites of change in duplicates with an indeterminate ancestral gene** | | | | | | | | | | | | |
| --- | --- | --- | --- | --- | --- | --- | --- | --- | --- | --- | --- | --- |
|  |  |  |  | |  | |  | |  | |  | |
| gene 1 | gene 2 | absolute position | zinc finger number | | position within zinc finger | | residue 1 | | residue 2 | | type | |
| ZFP112 | ZNF45 | 17 | 1 | | 17 | | W | | H | | nt_contact | |
| ZFP112 | ZNF45 | 20 | 1 | | 20 | | R | | V | | nt_contact | |
| ZFP112 | ZNF45 | 23 | 1 | | 23 | | A | | V | | nt_contact | |
| ZFP112 | ZNF45 | 45 | 2 | | 17 | | Y | | R | | nt_contact | |
| ZFP112 | ZNF45 | 48 | 2 | | 20 | | H | | Y | | nt_contact | |
| ZFP112 | ZNF45 | 51 | 2 | | 23 | | I | | A | | nt_contact | |
| ZFP112 | ZNF45 | 73 | 3 | | 17 | | V | | R | | nt_contact | |
| ZFP112 | ZNF45 | 76 | 3 | | 20 | | H | | Y | | nt_contact | |
| ZFP112 | ZNF45 | 79 | 3 | | 23 | | A | | G | | nt_contact | |
| ZFP112 | ZNF45 | 104 | 4 | | 20 | | N | | H | | nt_contact | |
| ZFP112 | ZNF45 | 107 | 4 | | 23 | | D | | G | | nt_contact | |
| ZFP112 | ZNF45 | 129 | 5 | | 17 | | R | | W | | nt_contact | |
| ZFP112 | ZNF45 | 132 | 5 | | 20 | | D | | N | | nt_contact | |
| ZFP112 | ZNF45 | 157 | 6 | | 17 | | Q | | K | | nt_contact | |
| ZFP112 | ZNF45 | 160 | 6 | | 20 | | N | | T | | nt_contact | |
| ZFP112 | ZNF45 | 185 | 7 | | 17 | | R | | Q | | nt_contact | |
| ZFP112 | ZNF45 | 188 | 7 | | 20 | | D | | Y | | nt_contact | |
| ZFP112 | ZNF45 | 191 | 7 | | 23 | | V | | S | | nt_contact | |
| ZFP112 | ZNF45 | 216 | 8 | | 20 | | S | | Y | | nt_contact | |
| ZFP112 | ZNF45 | 219 | 8 | | 23 | | V | | G | | nt_contact | |
| ZFP112 | ZNF45 | 241 | 9 | | 17 | | V | | Q | | nt_contact | |
| ZFP112 | ZNF45 | 244 | 9 | | 20 | | Q | | R | | nt_contact | |
| ZFP112 | ZNF45 | 272 | 10 | | 20 | | N | | R | | nt_contact | |
| ZFP112 | ZNF45 | 297 | 11 | | 17 | | Q | | G | | nt_contact | |
| ZFP112 | ZNF45 | 300 | 11 | | 20 | | Y | | S | | nt_contact | |
| ZFP112 | ZNF45 | 325 | 12 | | 17 | | W | | Q | | nt_contact | |
| ZFP112 | ZNF45 | 328 | 12 | | 20 | | Y | | N | | nt_contact | |
| ZFP112 | ZNF45 | 356 | 13 | | 20 | | S | | G | | nt_contact | |
| ZFP112 | ZNF45 | 50 | 2 | | 22 | | N | | Q | | ntc_adjacent | |
| ZFP112 | ZNF45 | 74 | 3 | | 18 | | G | | N | | ntc_adjacent | |
| ZFP112 | ZNF45 | 100 | 4 | | 16 | | C | | S | | ntc_adjacent | |
| ZFP112 | ZNF45 | 106 | 4 | | 22 | | L | | Q | | ntc_adjacent | |
| ZFP112 | ZNF45 | 131 | 5 | | 19 | | S | | F | | ntc_adjacent | |
| ZFP112 | ZNF45 | 133 | 5 | | 21 | | F | | L | | ntc_adjacent | |
| ZFP112 | ZNF45 | 134 | 5 | | 22 | | N | | Q | | ntc_adjacent | |
| ZFP112 | ZNF45 | 186 | 7 | | 18 | | S | | R | | ntc_adjacent | |
| ZFP112 | ZNF45 | 190 | 7 | | 22 | | N | | Q | | ntc_adjacent | |
| ZFP112 | ZNF45 | 214 | 8 | | 18 | | F | | R | | ntc_adjacent | |
| ZFP112 | ZNF45 | 215 | 8 | | 19 | | S | | A | | ntc_adjacent | |
| ZFP112 | ZNF45 | 242 | 9 | | 18 | | G | | S | | ntc_adjacent | |
| ZFP112 | ZNF45 | 246 | 9 | | 22 | | Q | | E | | ntc_adjacent | |
| ZFP112 | ZNF45 | 268 | 10 | | 16 | | C | | S | | ntc_adjacent | |
| ZFP112 | ZNF45 | 270 | 10 | | 18 | | A | | S | | ntc_adjacent | |
| ZFP112 | ZNF45 | 273 | 10 | | 21 | | F | | L | | ntc_adjacent | |
| ZFP112 | ZNF45 | 274 | 10 | | 22 | | L | | Q | | ntc_adjacent | |
| ZFP112 | ZNF45 | 296 | 11 | | 16 | | R | | S | | ntc_adjacent | |
| ZFP112 | ZNF45 | 326 | 12 | | 18 | | S | | R | | ntc_adjacent | |
| ZFP112 | ZNF45 | 352 | 13 | | 16 | | S | | R | | ntc_adjacent | |
| ZFP112 | ZNF45 | 27 | 1 | | 27 | | I | | V | | other | |
| ZFP112 | ZNF45 | 38 | 2 | | 10 | | A | | E | | other | |
| ZFP112 | ZNF45 | 40 | 2 | | 12 | | G | | D | | other | |
| ZFP112 | ZNF45 | 53 | 2 | | 25 | | C | | Q | | other | |
| ZFP112 | ZNF45 | 55 | 2 | | 27 | | I | | V | | other | |
| ZFP112 | ZNF45 | 83 | 3 | | 27 | | S | | V | | other | |
| ZFP112 | ZNF45 | 111 | 4 | | 27 | | G | | V | | other | |
| ZFP112 | ZNF45 | 118 | 5 | | 6 | | Y | | F | | other | |
| ZFP112 | ZNF45 | 119 | 5 | | 7 | | Q | | K | | other | |
| ZFP112 | ZNF45 | 121 | 5 | | 9 | | D | | E | | other | |
| ZFP112 | ZNF45 | 122 | 5 | | 10 | | A | | E | | other | |
| ZFP112 | ZNF45 | 137 | 5 | | 25 | | F | | Q | | other | |
| ZFP112 | ZNF45 | 167 | 6 | | 27 | | G | | V | | other | |
| ZFP112 | ZNF45 | 175 | 7 | | 7 | | K | | Q | | other | |
| ZFP112 | ZNF45 | 177 | 7 | | 9 | | G | | D | | other | |
| ZFP112 | ZNF45 | 178 | 7 | | 10 | | T | | E | | other | |
| ZFP112 | ZNF45 | 182 | 7 | | 14 | | G | | S | | other | |
| ZFP112 | ZNF45 | 193 | 7 | | 25 | | C | | Q | | other | |
| ZFP112 | ZNF45 | 194 | 7 | | 26 | | R | | S | | other | |
| ZFP112 | ZNF45 | 195 | 7 | | 27 | | I | | V | | other | |
| ZFP112 | ZNF45 | 200 | 8 | | 4 | | K | | R | | other | |
| ZFP112 | ZNF45 | 210 | 8 | | 14 | | A | | G | | other | |
| ZFP112 | ZNF45 | 226 | 9 | | 2 | | G | | R | | other | |
| ZFP112 | ZNF45 | 227 | 9 | | 3 | | E | | V | | other | |
| ZFP112 | ZNF45 | 231 | 9 | | 7 | | Q | | K | | other | |
| ZFP112 | ZNF45 | 233 | 9 | | 9 | | A | | E | | other | |
| ZFP112 | ZNF45 | 251 | 9 | | 27 | | C | | V | | other | |
| ZFP112 | ZNF45 | 255 | 10 | | 3 | | E | | G | | other | |
| ZFP112 | ZNF45 | 259 | 10 | | 7 | | Q | | K | | other | |
| ZFP112 | ZNF45 | 262 | 10 | | 10 | | E | | V | | other | |
| ZFP112 | ZNF45 | 264 | 10 | | 12 | | G | | T | | other | |
| ZFP112 | ZNF45 | 277 | 10 | | 25 | | R | | Q | | other | |
| ZFP112 | ZNF45 | 278 | 10 | | 26 | | G | | R | | other | |
| ZFP112 | ZNF45 | 282 | 11 | | 2 | | G | | E | | other | |
| ZFP112 | ZNF45 | 283 | 11 | | 3 | | E | | G | | other | |
| ZFP112 | ZNF45 | 284 | 11 | | 4 | | K | | R | | other | |
| ZFP112 | ZNF45 | 287 | 11 | | 7 | | R | | K | | other | |
| ZFP112 | ZNF45 | 289 | 11 | | 9 | | D | | E | | other | |
| ZFP112 | ZNF45 | 290 | 11 | | 10 | | V | | Q | | other | |
| ZFP112 | ZNF45 | 294 | 11 | | 14 | | R | | G | | other | |
| ZFP112 | ZNF45 | 305 | 11 | | 25 | | Q | | H | | other | |
| ZFP112 | ZNF45 | 318 | 12 | | 10 | | E | | V | | other | |
| ZFP112 | ZNF45 | 322 | 12 | | 14 | | V | | G | | other | |
| ZFP112 | ZNF45 | 345 | 13 | | 9 | | E | | D | | other | |
| ZFP112 | ZNF45 | 346 | 13 | | 10 | | E | | A | | other | |
| ZFP30 | ZFP82 | 244 | 9 | | 20 | | E | | Q | | nt_contact | |
| ZFP30 | ZFP82 | 300 | 11 | | 20 | | Q | | K | | nt_contact | |
| ZFP30 | ZFP82 | 303 | 11 | | 23 | | Q | | L | | nt_contact | |
| ZFP30 | ZFP82 | 359 | 13 | | 23 | | Y | | H | | nt_contact | |
| ZFP30 | ZFP82 | 46 | 2 | | 18 | | C | | T | | ntc_adjacent | |
| ZFP30 | ZFP82 | 50 | 2 | | 22 | | S | | T | | ntc_adjacent | |
| ZFP30 | ZFP82 | 106 | 4 | | 22 | | N | | T | | ntc_adjacent | |
| ZFP30 | ZFP82 | 158 | 6 | | 18 | | S | | G | | ntc_adjacent | |
| ZFP30 | ZFP82 | 159 | 6 | | 19 | | T | | S | | ntc_adjacent | |
| ZFP30 | ZFP82 | 218 | 8 | | 22 | | T | | I | | ntc_adjacent | |
| ZFP30 | ZFP82 | 240 | 9 | | 16 | | R | | S | | ntc_adjacent | |
| ZFP30 | ZFP82 | 270 | 10 | | 18 | | F | | L | | ntc_adjacent | |
| ZFP30 | ZFP82 | 299 | 11 | | 19 | | S | | Q | | ntc_adjacent | |
| ZFP30 | ZFP82 | 326 | 12 | | 18 | | H | | N | | ntc_adjacent | |
| ZFP30 | ZFP82 | 9 | 1 | | 9 | | G | | K | | other | |
| ZFP30 | ZFP82 | 25 | 1 | | 25 | | Q | | H | | other | |
| ZFP30 | ZFP82 | 41 | 2 | | 13 | | K | | M | | other | |
| ZFP30 | ZFP82 | 55 | 2 | | 27 | | I | | L | | other | |
| ZFP30 | ZFP82 | 58 | 3 | | 2 | | S | | G | | other | |
| ZFP30 | ZFP82 | 59 | 3 | | 3 | | D | | E | | other | |
| ZFP30 | ZFP82 | 69 | 3 | | 13 | | K | | E | | other | |
| ZFP30 | ZFP82 | 82 | 3 | | 26 | | R | | K | | other | |
| ZFP30 | ZFP82 | 119 | 5 | | 7 | | E | | V | | other | |
| ZFP30 | ZFP82 | 138 | 5 | | 26 | | R | | K | | other | |
| ZFP30 | ZFP82 | 143 | 6 | | 3 | | E | | D | | other | |
| ZFP30 | ZFP82 | 145 | 6 | | 5 | | C | | L | | other | |
| ZFP30 | ZFP82 | 153 | 6 | | 13 | | Q | | K | | other | |
| ZFP30 | ZFP82 | 203 | 8 | | 7 | | D | | E | | other | |
| ZFP30 | ZFP82 | 221 | 8 | | 25 | | Q | | H | | other | |
| ZFP30 | ZFP82 | 236 | 9 | | 12 | | Q | | W | | other | |
| ZFP30 | ZFP82 | 238 | 9 | | 14 | | F | | A | | other | |
| ZFP30 | ZFP82 | 250 | 9 | | 26 | | G | | S | | other | |
| ZFP30 | ZFP82 | 255 | 10 | | 3 | | E | | V | | other | |
| ZFP30 | ZFP82 | 281 | 11 | | 1 | | F | | I | | other | |
| ZFP30 | ZFP82 | 292 | 11 | | 12 | | E | | G | | other | |
| ZFP30 | ZFP82 | 314 | 12 | | 6 | | Y | | F | | other | |
| ZFP30 | ZFP82 | 315 | 12 | | 7 | | D | | E | | other | |
| ZFP30 | ZFP82 | 320 | 12 | | 12 | | G | | R | | other | |
| ZFP30 | ZFP82 | 333 | 12 | | 25 | | Q | | L | | other | |
| ZFP30 | ZFP82 | 361 | 13 | | 25 | | Q | | L | | other | |
| ZFP30 | ZFP82 | 362 | 13 | | 26 | | R | | K | | other | |
| ZNF100 | ZNF430 | 51 | 2 | | 23 | | T | | R | | nt_contact | |
| ZNF100 | ZNF430 | 73 | 3 | | 17 | | R | | Q | | nt_contact | |
| ZNF100 | ZNF430 | 76 | 3 | | 20 | | H | | T | | nt_contact | |
| ZNF100 | ZNF430 | 216 | 8 | | 20 | | A | | T | | nt_contact | |
| ZNF100 | ZNF430 | 247 | 9 | | 23 | | T | | A | | nt_contact | |
| ZNF100 | ZNF430 | 272 | 10 | | 20 | | Q | | N | | nt_contact | |
| ZNF100 | ZNF430 | 275 | 10 | | 23 | | A | | K | | nt_contact | |
| ZNF100 | ZNF430 | 72 | 3 | | 16 | | N | | K | | ntc_adjacent | |
| ZNF100 | ZNF430 | 12 | 1 | | 12 | | E | | D | | other | |
| ZNF100 | ZNF430 | 30 | 2 | | 2 | | T | | R | | other | |
| ZNF100 | ZNF430 | 37 | 2 | | 9 | | K | | E | | other | |
| ZNF100 | ZNF430 | 38 | 2 | | 10 | | D | | E | | other | |
| ZNF100 | ZNF430 | 42 | 2 | | 14 | | A | | V | | other | |
| ZNF100 | ZNF430 | 125 | 5 | | 13 | | K | | R | | other | |
| ZNF100 | ZNF430 | 137 | 5 | | 25 | | R | | K | | other | |
| ZNF100 | ZNF430 | 167 | 6 | | 27 | | T | | I | | other | |
| ZNF100 | ZNF430 | 195 | 7 | | 27 | | S | | I | | other | |
| ZNF100 | ZNF430 | 250 | 9 | | 26 | | M | | I | | other | |
| ZNF100 | ZNF430 | 279 | 10 | | 27 | | I | | T | | other | |
| ZNF124 | ZNF670 | 17 | 1 | | 17 | | Y | | F | | nt_contact | |
| ZNF124 | ZNF670 | 20 | 1 | | 20 | | Y | | S | | nt_contact | |
| ZNF124 | ZNF670 | 23 | 1 | | 23 | | E | | R | | nt_contact | |
| ZNF124 | ZNF670 | 45 | 2 | | 17 | | F | | R | | nt_contact | |
| ZNF124 | ZNF670 | 48 | 2 | | 20 | | S | | H | | nt_contact | |
| ZNF124 | ZNF670 | 51 | 2 | | 23 | | Q | | D | | nt_contact | |
| ZNF124 | ZNF670 | 73 | 3 | | 17 | | R | | Y | | nt_contact | |
| ZNF124 | ZNF670 | 76 | 3 | | 20 | | Y | | C | | nt_contact | |
| ZNF124 | ZNF670 | 79 | 3 | | 23 | | I | | Y | | nt_contact | |
| ZNF124 | ZNF670 | 107 | 4 | | 23 | | V | | G | | nt_contact | |
| ZNF124 | ZNF670 | 132 | 5 | | 20 | | N | | S | | nt_contact | |
| ZNF124 | ZNF670 | 135 | 5 | | 23 | | E | | K | | nt_contact | |
| ZNF124 | ZNF670 | 157 | 6 | | 17 | | S | | C | | nt_contact | |
| ZNF124 | ZNF670 | 160 | 6 | | 20 | | A | | S | | nt_contact | |
| ZNF124 | ZNF670 | 19 | 1 | | 19 | | S | | R | | ntc_adjacent | |
| ZNF124 | ZNF670 | 22 | 1 | | 22 | | R | | N | | ntc_adjacent | |
| ZNF124 | ZNF670 | 44 | 2 | | 16 | | T | | S | | ntc_adjacent | |
| ZNF124 | ZNF670 | 72 | 3 | | 16 | | S | | R | | ntc_adjacent | |
| ZNF124 | ZNF670 | 75 | 3 | | 19 | | T | | N | | ntc_adjacent | |
| ZNF124 | ZNF670 | 78 | 3 | | 22 | | G | | H | | ntc_adjacent | |
| ZNF124 | ZNF670 | 100 | 4 | | 16 | | R | | S | | ntc_adjacent | |
| ZNF124 | ZNF670 | 102 | 4 | | 18 | | S | | L | | ntc_adjacent | |
| ZNF124 | ZNF670 | 103 | 4 | | 19 | | R | | S | | ntc_adjacent | |
| ZNF124 | ZNF670 | 106 | 4 | | 22 | | R | | Q | | ntc_adjacent | |
| ZNF124 | ZNF670 | 128 | 5 | | 16 | | K | | R | | ntc_adjacent | |
| ZNF124 | ZNF670 | 130 | 5 | | 18 | | S | | A | | ntc_adjacent | |
| ZNF124 | ZNF670 | 134 | 5 | | 22 | | C | | Q | | ntc_adjacent | |
| ZNF124 | ZNF670 | 156 | 6 | | 16 | | T | | R | | ntc_adjacent | |
| ZNF124 | ZNF670 | 5 | 1 | | 5 | | T | | P | | other | |
| ZNF124 | ZNF670 | 7 | 1 | | 7 | | K | | E | | other | |
| ZNF124 | ZNF670 | 9 | 1 | | 9 | | K | | M | | other | |
| ZNF124 | ZNF670 | 12 | 1 | | 12 | | D | | G | | other | |
| ZNF124 | ZNF670 | 15 | 1 | | 15 | | F | | L | | other | |
| ZNF124 | ZNF670 | 25 | 1 | | 25 | | E | | K | | other | |
| ZNF124 | ZNF670 | 27 | 1 | | 27 | | T | | I | | other | |
| ZNF124 | ZNF670 | 33 | 2 | | 5 | | P | | R | | other | |
| ZNF124 | ZNF670 | 35 | 2 | | 7 | | A | | E | | other | |
| ZNF124 | ZNF670 | 38 | 2 | | 10 | | K | | Q | | other | |
| ZNF124 | ZNF670 | 42 | 2 | | 14 | | S | | A | | other | |
| ZNF124 | ZNF670 | 55 | 2 | | 27 | | S | | T | | other | |
| ZNF124 | ZNF670 | 66 | 3 | | 10 | | E | | H | | other | |
| ZNF124 | ZNF670 | 91 | 4 | | 7 | | E | | V | | other | |
| ZNF124 | ZNF670 | 94 | 4 | | 10 | | K | | E | | other | |
| ZNF124 | ZNF670 | 109 | 4 | | 25 | | E | | I | | other | |
| ZNF124 | ZNF670 | 110 | 4 | | 26 | | R | | K | | other | |
| ZNF124 | ZNF670 | 113 | 5 | | 1 | | S | | A | | other | |
| ZNF124 | ZNF670 | 116 | 5 | | 4 | | K | | E | | other | |
| ZNF124 | ZNF670 | 119 | 5 | | 7 | | E | | P | | other | |
| ZNF124 | ZNF670 | 138 | 5 | | 26 | | R | | K | | other | |
| ZNF124 | ZNF670 | 141 | 6 | | 1 | | T | | I | | other | |
| ZNF124 | ZNF670 | 142 | 6 | | 2 | | G | | A | | other | |
| ZNF124 | ZNF670 | 143 | 6 | | 3 | | V | | Q | | other | |
| ZNF124 | ZNF670 | 147 | 6 | | 7 | | G | | V | | other | |
| ZNF124 | ZNF670 | 149 | 6 | | 9 | | K | | N | | other | |
| ZNF124 | ZNF670 | 154 | 6 | | 14 | | S | | G | | other | |
| ZNF136 | ZNF564 | 20 | 1 | | 20 | | S | | R | | nt_contact | |
| ZNF136 | ZNF564 | 45 | 2 | | 17 | | R | | Y | | nt_contact | |
| ZNF136 | ZNF564 | 48 | 2 | | 20 | | L | | R | | nt_contact | |
| ZNF136 | ZNF564 | 51 | 2 | | 23 | | I | | T | | nt_contact | |
| ZNF136 | ZNF564 | 73 | 3 | | 17 | | S | | C | | nt_contact | |
| ZNF136 | ZNF564 | 101 | 4 | | 17 | | R | | S | | nt_contact | |
| ZNF136 | ZNF564 | 104 | 4 | | 20 | | L | | S | | nt_contact | |
| ZNF136 | ZNF564 | 107 | 4 | | 23 | | I | | V | | nt_contact | |
| ZNF136 | ZNF564 | 129 | 5 | | 17 | | S | | C | | nt_contact | |
| ZNF136 | ZNF564 | 132 | 5 | | 20 | | N | | T | | nt_contact | |
| ZNF136 | ZNF564 | 135 | 5 | | 23 | | S | | I | | nt_contact | |
| ZNF136 | ZNF564 | 157 | 6 | | 17 | | F | | Y | | nt_contact | |
| ZNF136 | ZNF564 | 160 | 6 | | 20 | | Y | | S | | nt_contact | |
| ZNF136 | ZNF564 | 163 | 6 | | 23 | | K | | L | | nt_contact | |
| ZNF136 | ZNF564 | 188 | 7 | | 20 | | N | | T | | nt_contact | |
| ZNF136 | ZNF564 | 191 | 7 | | 23 | | T | | I | | nt_contact | |
| ZNF136 | ZNF564 | 213 | 8 | | 17 | | S | | C | | nt_contact | |
| ZNF136 | ZNF564 | 241 | 9 | | 17 | | C | | S | | nt_contact | |
| ZNF136 | ZNF564 | 244 | 9 | | 20 | | S | | P | | nt_contact | |
| ZNF136 | ZNF564 | 272 | 10 | | 20 | | R | | S | | nt_contact | |
| ZNF136 | ZNF564 | 275 | 10 | | 23 | | K | | I | | nt_contact | |
| ZNF136 | ZNF564 | 297 | 11 | | 17 | | C | | Y | | nt_contact | |
| ZNF136 | ZNF564 | 325 | 12 | | 17 | | Y | | S | | nt_contact | |
| ZNF136 | ZNF564 | 331 | 12 | | 23 | | I | | L | | nt_contact | |
| ZNF136 | ZNF564 | 353 | 13 | | 17 | | Y | | C | | nt_contact | |
| ZNF136 | ZNF564 | 16 | 1 | | 16 | | I | | F | | ntc_adjacent | |
| ZNF136 | ZNF564 | 19 | 1 | | 19 | | P | | K | | ntc_adjacent | |
| ZNF136 | ZNF564 | 21 | 1 | | 21 | | V | | I | | ntc_adjacent | |
| ZNF136 | ZNF564 | 50 | 2 | | 22 | | Q | | R | | ntc_adjacent | |
| ZNF136 | ZNF564 | 72 | 3 | | 16 | | I | | T | | ntc_adjacent | |
| ZNF136 | ZNF564 | 77 | 3 | | 21 | | F | | V | | ntc_adjacent | |
| ZNF136 | ZNF564 | 78 | 3 | | 22 | | Q | | R | | ntc_adjacent | |
| ZNF136 | ZNF564 | 100 | 4 | | 16 | | D | | H | | ntc_adjacent | |
| ZNF136 | ZNF564 | 102 | 4 | | 18 | | P | | L | | ntc_adjacent | |
| ZNF136 | ZNF564 | 106 | 4 | | 22 | | R | | Q | | ntc_adjacent | |
| ZNF136 | ZNF564 | 128 | 5 | | 16 | | I | | S | | ntc_adjacent | |
| ZNF136 | ZNF564 | 130 | 5 | | 18 | | F | | S | | ntc_adjacent | |
| ZNF136 | ZNF564 | 131 | 5 | | 19 | | T | | P | | ntc_adjacent | |
| ZNF136 | ZNF564 | 133 | 5 | | 21 | | F | | L | | ntc_adjacent | |
| ZNF136 | ZNF564 | 134 | 5 | | 22 | | Q | | R | | ntc_adjacent | |
| ZNF136 | ZNF564 | 156 | 6 | | 16 | | I | | S | | ntc_adjacent | |
| ZNF136 | ZNF564 | 158 | 6 | | 18 | | P | | L | | ntc_adjacent | |
| ZNF136 | ZNF564 | 159 | 6 | | 19 | | S | | P | | ntc_adjacent | |
| ZNF136 | ZNF564 | 161 | 6 | | 21 | | V | | L | | ntc_adjacent | |
| ZNF136 | ZNF564 | 184 | 7 | | 16 | | S | | R | | ntc_adjacent | |
| ZNF136 | ZNF564 | 186 | 7 | | 18 | | S | | A | | ntc_adjacent | |
| ZNF136 | ZNF564 | 189 | 7 | | 21 | | V | | F | | ntc_adjacent | |
| ZNF136 | ZNF564 | 190 | 7 | | 22 | | R | | Q | | ntc_adjacent | |
| ZNF136 | ZNF564 | 212 | 8 | | 16 | | I | | S | | ntc_adjacent | |
| ZNF136 | ZNF564 | 214 | 8 | | 18 | | L | | I | | ntc_adjacent | |
| ZNF136 | ZNF564 | 217 | 8 | | 21 | | V | | M | | ntc_adjacent | |
| ZNF136 | ZNF564 | 240 | 9 | | 16 | | D | | H | | ntc_adjacent | |
| ZNF136 | ZNF564 | 242 | 9 | | 18 | | P | | L | | ntc_adjacent | |
| ZNF136 | ZNF564 | 246 | 9 | | 22 | | Q | | R | | ntc_adjacent | |
| ZNF136 | ZNF564 | 268 | 10 | | 16 | | I | | V | | ntc_adjacent | |
| ZNF136 | ZNF564 | 270 | 10 | | 18 | | L | | S | | ntc_adjacent | |
| ZNF136 | ZNF564 | 271 | 10 | | 19 | | K | | T | | ntc_adjacent | |
| ZNF136 | ZNF564 | 296 | 11 | | 16 | | D | | S | | ntc_adjacent | |
| ZNF136 | ZNF564 | 298 | 11 | | 18 | | P | | L | | ntc_adjacent | |
| ZNF136 | ZNF564 | 299 | 11 | | 19 | | S | | N | | ntc_adjacent | |
| ZNF136 | ZNF564 | 301 | 11 | | 21 | | V | | F | | ntc_adjacent | |
| ZNF136 | ZNF564 | 324 | 12 | | 16 | | N | | R | | ntc_adjacent | |
| ZNF136 | ZNF564 | 326 | 12 | | 18 | | A | | S | | ntc_adjacent | |
| ZNF136 | ZNF564 | 329 | 12 | | 21 | | I | | F | | ntc_adjacent | |
| ZNF136 | ZNF564 | 354 | 13 | | 18 | | S | | R | | ntc_adjacent | |
| ZNF136 | ZNF564 | 355 | 13 | | 19 | | S | | A | | ntc_adjacent | |
| ZNF136 | ZNF564 | 5 | 1 | | 5 | | P | | L | | other | |
| ZNF136 | ZNF564 | 7 | 1 | | 7 | | A | | D | | other | |
| ZNF136 | ZNF564 | 9 | 1 | | 9 | | P | | K | | other | |
| ZNF136 | ZNF564 | 14 | 1 | | 14 | | A | | T | | other | |
| ZNF136 | ZNF564 | 25 | 1 | | 25 | | M | | I | | other | |
| ZNF136 | ZNF564 | 27 | 1 | | 27 | | K | | T | | other | |
| ZNF136 | ZNF564 | 29 | 2 | | 1 | | T | | S | | other | |
| ZNF136 | ZNF564 | 31 | 2 | | 3 | | D | | Y | | other | |
| ZNF136 | ZNF564 | 32 | 2 | | 4 | | G | | T | | other | |
| ZNF136 | ZNF564 | 37 | 2 | | 9 | | Q | | K | | other | |
| ZNF136 | ZNF564 | 38 | 2 | | 10 | | E | | V | | other | |
| ZNF136 | ZNF564 | 55 | 2 | | 27 | | T | | S | | other | |
| ZNF136 | ZNF564 | 83 | 3 | | 27 | | R | | K | | other | |
| ZNF136 | ZNF564 | 93 | 4 | | 9 | | Q | | K | | other | |
| ZNF136 | ZNF564 | 94 | 4 | | 10 | | E | | V | | other | |
| ZNF136 | ZNF564 | 98 | 4 | | 14 | | A | | P | | other | |
| ZNF136 | ZNF564 | 111 | 4 | | 27 | | T | | I | | other | |
| ZNF136 | ZNF564 | 118 | 5 | | 6 | | H | | F | | other | |
| ZNF136 | ZNF564 | 119 | 5 | | 7 | | E | | K | | other | |
| ZNF136 | ZNF564 | 137 | 5 | | 25 | | M | | E | | other | |
| ZNF136 | ZNF564 | 138 | 5 | | 26 | | I | | R | | other | |
| ZNF136 | ZNF564 | 139 | 5 | | 27 | | R | | T | | other | |
| ZNF136 | ZNF564 | 143 | 6 | | 3 | | D | | E | | other | |
| ZNF136 | ZNF564 | 144 | 6 | | 4 | | G | | K | | other | |
| ZNF136 | ZNF564 | 147 | 6 | | 7 | | K | | E | | other | |
| ZNF136 | ZNF564 | 150 | 6 | | 10 | | V | | Q | | other | |
| ZNF136 | ZNF564 | 153 | 6 | | 13 | | R | | K | | other | |
| ZNF136 | ZNF564 | 167 | 6 | | 27 | | T | | I | | other | |
| ZNF136 | ZNF564 | 174 | 7 | | 6 | | Y | | F | | other | |
| ZNF136 | ZNF564 | 175 | 7 | | 7 | | E | | V | | other | |
| ZNF136 | ZNF564 | 177 | 7 | | 9 | | N | | K | | other | |
| ZNF136 | ZNF564 | 178 | 7 | | 10 | | K | | Q | | other | |
| ZNF136 | ZNF564 | 182 | 7 | | 14 | | T | | A | | other | |
| ZNF136 | ZNF564 | 209 | 8 | | 13 | | K | | E | | other | |
| ZNF136 | ZNF564 | 227 | 9 | | 3 | | D | | E | | other | |
| ZNF136 | ZNF564 | 233 | 9 | | 9 | | Q | | K | | other | |
| ZNF136 | ZNF564 | 237 | 9 | | 13 | | R | | K | | other | |
| ZNF136 | ZNF564 | 238 | 9 | | 14 | | A | | P | | other | |
| ZNF136 | ZNF564 | 261 | 10 | | 9 | | Q | | K | | other | |
| ZNF136 | ZNF564 | 262 | 10 | | 10 | | V | | H | | other | |
| ZNF136 | ZNF564 | 277 | 10 | | 25 | | M | | E | | other | |
| ZNF136 | ZNF564 | 278 | 10 | | 26 | | I | | R | | other | |
| ZNF136 | ZNF564 | 279 | 10 | | 27 | | L | | T | | other | |
| ZNF136 | ZNF564 | 283 | 11 | | 3 | | D | | E | | other | |
| ZNF136 | ZNF564 | 284 | 11 | | 4 | | G | | K | | other | |
| ZNF136 | ZNF564 | 287 | 11 | | 7 | | K | | E | | other | |
| ZNF136 | ZNF564 | 289 | 11 | | 9 | | Q | | K | | other | |
| ZNF136 | ZNF564 | 290 | 11 | | 10 | | V | | Q | | other | |
| ZNF136 | ZNF564 | 306 | 11 | | 26 | | R | | M | | other | |
| ZNF136 | ZNF564 | 307 | 11 | | 27 | | T | | I | | other | |
| ZNF136 | ZNF564 | 314 | 12 | | 6 | | Y | | F | | other | |
| ZNF136 | ZNF564 | 318 | 12 | | 10 | | E | | R | | other | |
| ZNF136 | ZNF564 | 339 | 13 | | 3 | | E | | Q | | other | |
| ZNF136 | ZNF564 | 343 | 13 | | 7 | | E | | H | | other | |
| ZNF136 | ZNF564 | 346 | 13 | | 10 | | Q | | E | | other | |
| ZNF136 | ZNF564 | 350 | 13 | | 14 | | T | | A | | other | |
| ZNF136 | ZNF564 | 351 | 13 | | 15 | | F | | Y | | other | |
| ZNF136 | ZNF564 | 362 | 13 | | 26 | | R | | L | | other | |
| ZNF136 | ZNF564 | 363 | 13 | | 27 | | A | | T | | other | |
| ZNF226 | ZNF234 | 20 | 1 | | 20 | | A | | T | | nt_contact | |
| ZNF226 | ZNF234 | 45 | 2 | | 17 | | Q | | H | | nt_contact | |
| ZNF226 | ZNF234 | 51 | 2 | | 23 | | D | | E | | nt_contact | |
| ZNF226 | ZNF234 | 76 | 3 | | 20 | | H | | A | | nt_contact | |
| ZNF226 | ZNF234 | 129 | 5 | | 17 | | R | | Q | | nt_contact | |
| ZNF226 | ZNF234 | 132 | 5 | | 20 | | S | | Q | | nt_contact | |
| ZNF226 | ZNF234 | 157 | 6 | | 17 | | L | | Y | | nt_contact | |
| ZNF226 | ZNF234 | 160 | 6 | | 20 | | N | | S | | nt_contact | |
| ZNF226 | ZNF234 | 185 | 7 | | 17 | | R | | M | | nt_contact | |
| ZNF226 | ZNF234 | 300 | 11 | | 20 | | N | | H | | nt_contact | |
| ZNF226 | ZNF234 | 303 | 11 | | 23 | | A | | T | | nt_contact | |
| ZNF226 | ZNF234 | 415 | 15 | | 23 | | S | | Y | | nt_contact | |
| ZNF226 | ZNF234 | 72 | 3 | | 16 | | S | | R | | ntc_adjacent | |
| ZNF226 | ZNF234 | 74 | 3 | | 18 | | N | | R | | ntc_adjacent | |
| ZNF226 | ZNF234 | 78 | 3 | | 22 | | Q | | N | | ntc_adjacent | |
| ZNF226 | ZNF234 | 100 | 4 | | 16 | | I | | T | | ntc_adjacent | |
| ZNF226 | ZNF234 | 133 | 5 | | 21 | | L | | F | | ntc_adjacent | |
| ZNF226 | ZNF234 | 156 | 6 | | 16 | | T | | I | | ntc_adjacent | |
| ZNF226 | ZNF234 | 161 | 6 | | 21 | | L | | F | | ntc_adjacent | |
| ZNF226 | ZNF234 | 186 | 7 | | 18 | | N | | K | | ntc_adjacent | |
| ZNF226 | ZNF234 | 187 | 7 | | 19 | | S | | I | | ntc_adjacent | |
| ZNF226 | ZNF234 | 212 | 8 | | 16 | | S | | R | | ntc_adjacent | |
| ZNF226 | ZNF234 | 218 | 8 | | 22 | | Q | | K | | ntc_adjacent | |
| ZNF226 | ZNF234 | 296 | 11 | | 16 | | R | | S | | ntc_adjacent | |
| ZNF226 | ZNF234 | 442 | 16 | | 22 | | T | | V | | ntc_adjacent | |
| ZNF226 | ZNF234 | 70 | 3 | | 14 | | S | | N | | other | |
| ZNF226 | ZNF234 | 81 | 3 | | 25 | | Q | | C | | other | |
| ZNF226 | ZNF234 | 82 | 3 | | 26 | | R | | M | | other | |
| ZNF226 | ZNF234 | 98 | 4 | | 14 | | G | | C | | other | |
| ZNF226 | ZNF234 | 126 | 5 | | 14 | | G | | C | | other | |
| ZNF226 | ZNF234 | 138 | 5 | | 26 | | G | | R | | other | |
| ZNF226 | ZNF234 | 145 | 6 | | 5 | | S | | P | | other | |
| ZNF226 | ZNF234 | 166 | 6 | | 26 | | R | | G | | other | |
| ZNF226 | ZNF234 | 417 | 15 | | 25 | | Q | | R | | other | |
| ZNF226 | ZNF234 | 446 | 16 | | 26 | | R | | K | | other | |
| ZNF264 | ZNF805 | 23 | 1 | | 23 | | G | | R | | nt_contact | |
| ZNF264 | ZNF805 | 48 | 2 | | 20 | | H | | Y | | nt_contact | |
| ZNF264 | ZNF805 | 76 | 3 | | 20 | | Y | | H | | nt_contact | |
| ZNF264 | ZNF805 | 104 | 4 | | 20 | | N | | T | | nt_contact | |
| ZNF264 | ZNF805 | 129 | 5 | | 17 | | H | | D | | nt_contact | |
| ZNF264 | ZNF805 | 19 | 1 | | 19 | | H | | R | | ntc_adjacent | |
| ZNF264 | ZNF805 | 44 | 2 | | 16 | | I | | S | | ntc_adjacent | |
| ZNF264 | ZNF805 | 134 | 5 | | 22 | | L | | I | | ntc_adjacent | |
| ZNF264 | ZNF805 | 271 | 10 | | 19 | | K | | A | | ntc_adjacent | |
| ZNF264 | ZNF805 | 26 | 1 | | 26 | | K | | R | | other | |
| ZNF264 | ZNF805 | 55 | 2 | | 27 | | I | | V | | other | |
| ZNF264 | ZNF805 | 60 | 3 | | 4 | | R | | K | | other | |
| ZNF264 | ZNF805 | 63 | 3 | | 7 | | E | | K | | other | |
| ZNF264 | ZNF805 | 111 | 4 | | 27 | | R | | S | | other | |
| ZNF264 | ZNF805 | 117 | 5 | | 5 | | S | | P | | other | |
| ZNF264 | ZNF805 | 125 | 5 | | 13 | | Q | | K | | other | |
| ZNF264 | ZNF805 | 126 | 5 | | 14 | | V | | A | | other | |
| ZNF264 | ZNF805 | 322 | 12 | | 14 | | S | | T | | other | |
| ZNF264 | ZNF805 | 343 | 13 | | 7 | | K | | E | | other | |
| ZNF273 | ZNF680 | 17 | 1 | | 17 | | Q | | W | | nt_contact | |
| ZNF273 | ZNF680 | 20 | 1 | | 20 | | N | | E | | nt_contact | |
| ZNF273 | ZNF680 | 73 | 3 | | 17 | | V | | L | | nt_contact | |
| ZNF273 | ZNF680 | 107 | 4 | | 23 | | K | | N | | nt_contact | |
| ZNF273 | ZNF680 | 129 | 5 | | 17 | | W | | Q | | nt_contact | |
| ZNF273 | ZNF680 | 132 | 5 | | 20 | | T | | N | | nt_contact | |
| ZNF273 | ZNF680 | 160 | 6 | | 20 | | T | | N | | nt_contact | |
| ZNF273 | ZNF680 | 185 | 7 | | 17 | | V | | G | | nt_contact | |
| ZNF273 | ZNF680 | 188 | 7 | | 20 | | T | | S | | nt_contact | |
| ZNF273 | ZNF680 | 191 | 7 | | 23 | | K | | R | | nt_contact | |
| ZNF273 | ZNF680 | 213 | 8 | | 17 | | A | | L | | nt_contact | |
| ZNF273 | ZNF680 | 219 | 8 | | 23 | | E | | N | | nt_contact | |
| ZNF273 | ZNF680 | 247 | 9 | | 23 | | K | | N | | nt_contact | |
| ZNF273 | ZNF680 | 272 | 10 | | 20 | | N | | H | | nt_contact | |
| ZNF273 | ZNF680 | 22 | 1 | | 22 | | T | | I | | ntc_adjacent | |
| ZNF273 | ZNF680 | 47 | 2 | | 19 | | L | | S | | ntc_adjacent | |
| ZNF273 | ZNF680 | 50 | 2 | | 22 | | T | | I | | ntc_adjacent | |
| ZNF273 | ZNF680 | 78 | 3 | | 22 | | T | | S | | ntc_adjacent | |
| ZNF273 | ZNF680 | 100 | 4 | | 16 | | S | | N | | ntc_adjacent | |
| ZNF273 | ZNF680 | 103 | 4 | | 19 | | S | | A | | ntc_adjacent | |
| ZNF273 | ZNF680 | 130 | 5 | | 18 | | S | | F | | ntc_adjacent | |
| ZNF273 | ZNF680 | 158 | 6 | | 18 | | S | | F | | ntc_adjacent | |
| ZNF273 | ZNF680 | 159 | 6 | | 19 | | S | | A | | ntc_adjacent | |
| ZNF273 | ZNF680 | 184 | 7 | | 16 | | S | | N | | ntc_adjacent | |
| ZNF273 | ZNF680 | 186 | 7 | | 18 | | F | | C | | ntc_adjacent | |
| ZNF273 | ZNF680 | 212 | 8 | | 16 | | R | | T | | ntc_adjacent | |
| ZNF273 | ZNF680 | 242 | 9 | | 18 | | S | | P | | ntc_adjacent | |
| ZNF273 | ZNF680 | 243 | 9 | | 19 | | S | | A | | ntc_adjacent | |
| ZNF273 | ZNF680 | 246 | 9 | | 22 | | T | | A | | ntc_adjacent | |
| ZNF273 | ZNF680 | 5 | 1 | | 5 | | F | | S | | other | |
| ZNF273 | ZNF680 | 9 | 1 | | 9 | | K | | E | | other | |
| ZNF273 | ZNF680 | 10 | 1 | | 10 | | T | | E | | other | |
| ZNF273 | ZNF680 | 15 | 1 | | 15 | | F | | L | | other | |
| ZNF273 | ZNF680 | 30 | 2 | | 2 | | E | | G | | other | |
| ZNF273 | ZNF680 | 31 | 2 | | 3 | | V | | E | | other | |
| ZNF273 | ZNF680 | 32 | 2 | | 4 | | N | | K | | other | |
| ZNF273 | ZNF680 | 57 | 3 | | 1 | | T | | I | | other | |
| ZNF273 | ZNF680 | 87 | 4 | | 3 | | T | | D | | other | |
| ZNF273 | ZNF680 | 96 | 4 | | 12 | | G | | H | | other | |
| ZNF273 | ZNF680 | 110 | 4 | | 26 | | I | | R | | other | |
| ZNF273 | ZNF680 | 118 | 5 | | 6 | | Y | | F | | other | |
| ZNF273 | ZNF680 | 121 | 5 | | 9 | | N | | E | | other | |
| ZNF273 | ZNF680 | 138 | 5 | | 26 | | R | | K | | other | |
| ZNF273 | ZNF680 | 166 | 6 | | 26 | | I | | K | | other | |
| ZNF273 | ZNF680 | 167 | 6 | | 27 | | V | | I | | other | |
| ZNF273 | ZNF680 | 170 | 7 | | 2 | | K | | G | | other | |
| ZNF273 | ZNF680 | 194 | 7 | | 26 | | I | | R | | other | |
| ZNF273 | ZNF680 | 198 | 8 | | 2 | | G | | R | | other | |
| ZNF273 | ZNF680 | 199 | 8 | | 3 | | A | | E | | other | |
| ZNF273 | ZNF680 | 200 | 8 | | 4 | | K | | N | | other | |
| ZNF273 | ZNF680 | 201 | 8 | | 5 | | P | | T | | other | |
| ZNF273 | ZNF680 | 209 | 8 | | 13 | | S | | K | | other | |
| ZNF273 | ZNF680 | 210 | 8 | | 14 | | A | | G | | other | |
| ZNF273 | ZNF680 | 223 | 8 | | 27 | | V | | I | | other | |
| ZNF273 | ZNF680 | 229 | 9 | | 5 | | P | | S | | other | |
| ZNF273 | ZNF680 | 238 | 9 | | 14 | | A | | V | | other | |
| ZNF273 | ZNF680 | 253 | 10 | | 1 | | T | | A | | other | |
| ZNF273 | ZNF680 | 254 | 10 | | 2 | | G | | R | | other | |
| ZNF354A | ZNF354B | 17 | 1 | | 17 | | H | | N | | nt_contact | |
| ZNF354A | ZNF354B | 73 | 3 | | 17 | | H | | L | | nt_contact | |
| ZNF354A | ZNF354B | 72 | 3 | | 16 | | S | | T | | ntc_adjacent | |
| ZNF354A | ZNF354B | 75 | 3 | | 19 | | A | | T | | ntc_adjacent | |
| ZNF354A | ZNF354B | 299 | 11 | | 19 | | A | | S | | ntc_adjacent | |
| ZNF354A | ZNF354B | 329 | 12 | | 21 | | L | | R | | ntc_adjacent | |
| ZNF354A | ZNF354B | 352 | 13 | | 16 | | S | | N | | ntc_adjacent | |
| ZNF354A | ZNF354B | 54 | 2 | | 26 | | R | | I | | other | |
| ZNF382 | ZNF567 | 17 | 1 | | 17 | | L | | R | | nt_contact | |
| ZNF382 | ZNF567 | 20 | 1 | | 20 | | H | | Y | | nt_contact | |
| ZNF382 | ZNF567 | 23 | 1 | | 23 | | R | | E | | nt_contact | |
| ZNF382 | ZNF567 | 48 | 2 | | 20 | | T | | A | | nt_contact | |
| ZNF382 | ZNF567 | 79 | 3 | | 23 | | A | | R | | nt_contact | |
| ZNF382 | ZNF567 | 101 | 4 | | 17 | | M | | K | | nt_contact | |
| ZNF382 | ZNF567 | 132 | 5 | | 20 | | N | | T | | nt_contact | |
| ZNF382 | ZNF567 | 135 | 5 | | 23 | | L | | V | | nt_contact | |
| ZNF382 | ZNF567 | 163 | 6 | | 23 | | V | | L | | nt_contact | |
| ZNF382 | ZNF567 | 185 | 7 | | 17 | | R | | Q | | nt_contact | |
| ZNF382 | ZNF567 | 188 | 7 | | 20 | | Y | | I | | nt_contact | |
| ZNF382 | ZNF567 | 191 | 7 | | 23 | | H | | V | | nt_contact | |
| ZNF382 | ZNF567 | 213 | 8 | | 17 | | Q | | R | | nt_contact | |
| ZNF382 | ZNF567 | 219 | 8 | | 23 | | V | | R | | nt_contact | |
| ZNF382 | ZNF567 | 241 | 9 | | 17 | | Y | | C | | nt_contact | |
| ZNF382 | ZNF567 | 44 | 2 | | 16 | | S | | R | | ntc_adjacent | |
| ZNF382 | ZNF567 | 50 | 2 | | 22 | | A | | T | | ntc_adjacent | |
| ZNF382 | ZNF567 | 75 | 3 | | 19 | | T | | A | | ntc_adjacent | |
| ZNF382 | ZNF567 | 78 | 3 | | 22 | | V | | T | | ntc_adjacent | |
| ZNF382 | ZNF567 | 128 | 5 | | 16 | | S | | I | | ntc_adjacent | |
| ZNF382 | ZNF567 | 134 | 5 | | 22 | | N | | T | | ntc_adjacent | |
| ZNF382 | ZNF567 | 156 | 6 | | 16 | | R | | C | | ntc_adjacent | |
| ZNF382 | ZNF567 | 159 | 6 | | 19 | | A | | T | | ntc_adjacent | |
| ZNF382 | ZNF567 | 184 | 7 | | 16 | | S | | R | | ntc_adjacent | |
| ZNF382 | ZNF567 | 187 | 7 | | 19 | | S | | A | | ntc_adjacent | |
| ZNF382 | ZNF567 | 190 | 7 | | 22 | | I | | T | | ntc_adjacent | |
| ZNF382 | ZNF567 | 212 | 8 | | 16 | | R | | S | | ntc_adjacent | |
| ZNF382 | ZNF567 | 215 | 8 | | 19 | | T | | S | | ntc_adjacent | |
| ZNF382 | ZNF567 | 243 | 9 | | 19 | | R | | S | | ntc_adjacent | |
| ZNF382 | ZNF567 | 2 | 1 | | 2 | | G | | E | | other | |
| ZNF382 | ZNF567 | 9 | 1 | | 9 | | N | | P | | other | |
| ZNF382 | ZNF567 | 10 | 1 | | 10 | | E | | Y | | other | |
| ZNF382 | ZNF567 | 27 | 1 | | 27 | | T | | I | | other | |
| ZNF382 | ZNF567 | 35 | 2 | | 7 | | I | | V | | other | |
| ZNF382 | ZNF567 | 38 | 2 | | 10 | | E | | Q | | other | |
| ZNF382 | ZNF567 | 42 | 2 | | 14 | | S | | A | | other | |
| ZNF382 | ZNF567 | 59 | 3 | | 3 | | E | | G | | other | |
| ZNF382 | ZNF567 | 66 | 3 | | 10 | | E | | D | | other | |
| ZNF382 | ZNF567 | 81 | 3 | | 25 | | Q | | H | | other | |
| ZNF382 | ZNF567 | 82 | 3 | | 26 | | R | | K | | other | |
| ZNF382 | ZNF567 | 89 | 4 | | 5 | | S | | A | | other | |
| ZNF382 | ZNF567 | 94 | 4 | | 10 | | H | | Q | | other | |
| ZNF382 | ZNF567 | 97 | 4 | | 13 | | K | | S | | other | |
| ZNF382 | ZNF567 | 109 | 4 | | 25 | | H | | Q | | other | |
| ZNF382 | ZNF567 | 119 | 5 | | 7 | | E | | Q | | other | |
| ZNF382 | ZNF567 | 126 | 5 | | 14 | | S | | A | | other | |
| ZNF382 | ZNF567 | 139 | 5 | | 27 | | I | | T | | other | |
| ZNF382 | ZNF567 | 166 | 6 | | 26 | | K | | R | | other | |
| ZNF382 | ZNF567 | 171 | 7 | | 3 | | Q | | E | | other | |
| ZNF382 | ZNF567 | 173 | 7 | | 5 | | S | | P | | other | |
| ZNF382 | ZNF567 | 175 | 7 | | 7 | | E | | I | | other | |
| ZNF382 | ZNF567 | 177 | 7 | | 9 | | P | | N | | other | |
| ZNF382 | ZNF567 | 178 | 7 | | 10 | | Q | | E | | other | |
| ZNF382 | ZNF567 | 182 | 7 | | 14 | | A | | S | | other | |
| ZNF382 | ZNF567 | 195 | 7 | | 27 | | T | | I | | other | |
| ZNF382 | ZNF567 | 201 | 8 | | 5 | | P | | S | | other | |
| ZNF382 | ZNF567 | 202 | 8 | | 6 | | Y | | N | | other | |
| ZNF382 | ZNF567 | 203 | 8 | | 7 | | K | | G | | other | |
| ZNF382 | ZNF567 | 206 | 8 | | 10 | | E | | Q | | other | |
| ZNF382 | ZNF567 | 210 | 8 | | 14 | | C | | A | | other | |
| ZNF382 | ZNF567 | 222 | 8 | | 26 | | R | | K | | other | |
| ZNF382 | ZNF567 | 233 | 9 | | 9 | | N | | K | | other | |
| ZNF382 | ZNF567 | 238 | 9 | | 14 | | S | | F | | other | |
| ZNF382 | ZNF567 | 250 | 9 | | 26 | | R | | K | | other | |
| ZNF383 | ZNF829 | 104 | 4 | | 20 | | R | | K | | nt_contact | |
| ZNF383 | ZNF829 | 132 | 5 | | 20 | | T | | A | | nt_contact | |
| ZNF383 | ZNF829 | 160 | 6 | | 20 | | E | | Q | | nt_contact | |
| ZNF383 | ZNF829 | 21 | 1 | | 21 | | F | | L | | ntc_adjacent | |
| ZNF383 | ZNF829 | 102 | 4 | | 18 | | H | | S | | ntc_adjacent | |
| ZNF383 | ZNF829 | 106 | 4 | | 22 | | I | | V | | ntc_adjacent | |
| ZNF383 | ZNF829 | 130 | 5 | | 18 | | A | | G | | ntc_adjacent | |
| ZNF383 | ZNF829 | 162 | 6 | | 22 | | I | | F | | ntc_adjacent | |
| ZNF383 | ZNF829 | 186 | 7 | | 18 | | G | | C | | ntc_adjacent | |
| ZNF383 | ZNF829 | 212 | 8 | | 16 | | G | | S | | ntc_adjacent | |
| ZNF383 | ZNF829 | 214 | 8 | | 18 | | R | | G | | ntc_adjacent | |
| ZNF383 | ZNF829 | 6 | 1 | | 6 | | Y | | F | | other | |
| ZNF383 | ZNF829 | 31 | 2 | | 3 | | E | | K | | other | |
| ZNF383 | ZNF829 | 111 | 4 | | 27 | | M | | I | | other | |
| ZNF383 | ZNF829 | 145 | 6 | | 5 | | L | | P | | other | |
| ZNF383 | ZNF829 | 193 | 7 | | 25 | | Q | | L | | other | |
| ZNF383 | ZNF829 | 203 | 8 | | 7 | | D | | N | | other | |
| ZNF383 | ZNF829 | 221 | 8 | | 25 | | E | | Q | | other | |
| ZNF41 | ZNF484 | 20 | 1 | | 20 | | T | | A | | nt_contact | |
| ZNF41 | ZNF484 | 45 | 2 | | 17 | | R | | Q | | nt_contact | |
| ZNF41 | ZNF484 | 107 | 4 | | 23 | | I | | T | | nt_contact | |
| ZNF41 | ZNF484 | 191 | 7 | | 23 | | M | | V | | nt_contact | |
| ZNF41 | ZNF484 | 213 | 8 | | 17 | | H | | Q | | nt_contact | |
| ZNF41 | ZNF484 | 219 | 8 | | 23 | | T | | A | | nt_contact | |
| ZNF41 | ZNF484 | 297 | 11 | | 17 | | R | | W | | nt_contact | |
| ZNF41 | ZNF484 | 300 | 11 | | 20 | | G | | R | | nt_contact | |
| ZNF41 | ZNF484 | 325 | 12 | | 17 | | R | | Q | | nt_contact | |
| ZNF41 | ZNF484 | 353 | 13 | | 17 | | Q | | D | | nt_contact | |
| ZNF41 | ZNF484 | 356 | 13 | | 20 | | H | | N | | nt_contact | |
| ZNF41 | ZNF484 | 359 | 13 | | 23 | | R | | K | | nt_contact | |
| ZNF41 | ZNF484 | 50 | 2 | | 22 | | I | | N | | ntc_adjacent | |
| ZNF41 | ZNF484 | 106 | 4 | | 22 | | I | | T | | ntc_adjacent | |
| ZNF41 | ZNF484 | 130 | 5 | | 18 | | R | | Q | | ntc_adjacent | |
| ZNF41 | ZNF484 | 156 | 6 | | 16 | | T | | I | | ntc_adjacent | |
| ZNF41 | ZNF484 | 162 | 6 | | 22 | | R | | K | | ntc_adjacent | |
| ZNF41 | ZNF484 | 212 | 8 | | 16 | | F | | I | | ntc_adjacent | |
| ZNF41 | ZNF484 | 246 | 9 | | 22 | | H | | R | | ntc_adjacent | |
| ZNF41 | ZNF484 | 274 | 10 | | 22 | | F | | I | | ntc_adjacent | |
| ZNF41 | ZNF484 | 324 | 12 | | 16 | | A | | I | | ntc_adjacent | |
| ZNF41 | ZNF484 | 327 | 12 | | 19 | | S | | A | | ntc_adjacent | |
| ZNF41 | ZNF484 | 330 | 12 | | 22 | | I | | S | | ntc_adjacent | |
| ZNF41 | ZNF484 | 354 | 13 | | 18 | | K | | R | | ntc_adjacent | |
| ZNF41 | ZNF484 | 358 | 13 | | 22 | | N | | I | | ntc_adjacent | |
| ZNF41 | ZNF484 | 6 | 1 | | 6 | | F | | Y | | other | |
| ZNF41 | ZNF484 | 26 | 1 | | 26 | | K | | R | | other | |
| ZNF41 | ZNF484 | 53 | 2 | | 25 | | E | | Q | | other | |
| ZNF41 | ZNF484 | 88 | 4 | | 4 | | N | | K | | other | |
| ZNF41 | ZNF484 | 90 | 4 | | 6 | | F | | Y | | other | |
| ZNF41 | ZNF484 | 111 | 4 | | 27 | | I | | T | | other | |
| ZNF41 | ZNF484 | 116 | 5 | | 4 | | R | | K | | other | |
| ZNF41 | ZNF484 | 119 | 5 | | 7 | | I | | M | | other | |
| ZNF41 | ZNF484 | 121 | 5 | | 9 | | T | | A | | other | |
| ZNF41 | ZNF484 | 139 | 5 | | 27 | | I | | T | | other | |
| ZNF41 | ZNF484 | 149 | 6 | | 9 | | S | | N | | other | |
| ZNF41 | ZNF484 | 150 | 6 | | 10 | | D | | G | | other | |
| ZNF41 | ZNF484 | 154 | 6 | | 14 | | S | | A | | other | |
| ZNF41 | ZNF484 | 167 | 6 | | 27 | | C | | S | | other | |
| ZNF41 | ZNF484 | 169 | 7 | | 1 | | T | | I | | other | |
| ZNF41 | ZNF484 | 205 | 8 | | 9 | | T | | P | | other | |
| ZNF41 | ZNF484 | 221 | 8 | | 25 | | E | | H | | other | |
| ZNF41 | ZNF484 | 238 | 9 | | 14 | | S | | C | | other | |
| ZNF41 | ZNF484 | 250 | 9 | | 26 | | Q | | K | | other | |
| ZNF41 | ZNF484 | 258 | 10 | | 6 | | Y | | N | | other | |
| ZNF41 | ZNF484 | 259 | 10 | | 7 | | R | | I | | other | |
| ZNF41 | ZNF484 | 282 | 11 | | 2 | | G | | R | | other | |
| ZNF41 | ZNF484 | 294 | 11 | | 14 | | A | | T | | other | |
| ZNF41 | ZNF484 | 306 | 11 | | 26 | | Q | | K | | other | |
| ZNF41 | ZNF484 | 318 | 12 | | 10 | | E | | K | | other | |
| ZNF41 | ZNF484 | 334 | 12 | | 26 | | R | | I | | other | |
| ZNF41 | ZNF484 | 339 | 13 | | 3 | | E | | K | | other | |
| ZNF41 | ZNF484 | 343 | 13 | | 7 | | I | | A | | other | |
| ZNF41 | ZNF484 | 348 | 13 | | 12 | | G | | Q | | other | |
| ZNF41 | ZNF484 | 350 | 13 | | 14 | | S | | A | | other | |
| ZNF41 | ZNF484 | 362 | 13 | | 26 | | R | | K | | other | |
| ZNF528 | LLNL759 | 17 | 1 | | 17 | | C | | N | | nt_contact | |
| ZNF528 | LLNL759 | 20 | 1 | | 20 | | K | | N | | nt_contact | |
| ZNF528 | LLNL759 | 23 | 1 | | 23 | | I | | Q | | nt_contact | |
| ZNF528 | LLNL759 | 45 | 2 | | 17 | | S | | R | | nt_contact | |
| ZNF528 | LLNL759 | 48 | 2 | | 20 | | N | | L | | nt_contact | |
| ZNF528 | LLNL759 | 51 | 2 | | 23 | | Q | | R | | nt_contact | |
| ZNF528 | LLNL759 | 73 | 3 | | 17 | | S | | Q | | nt_contact | |
| ZNF528 | LLNL759 | 76 | 3 | | 20 | | K | | H | | nt_contact | |
| ZNF528 | LLNL759 | 79 | 3 | | 23 | | Q | | N | | nt_contact | |
| ZNF528 | LLNL759 | 101 | 4 | | 17 | | Q | | R | | nt_contact | |
| ZNF528 | LLNL759 | 129 | 5 | | 17 | | R | | G | | nt_contact | |
| ZNF528 | LLNL759 | 132 | 5 | | 20 | | Y | | G | | nt_contact | |
| ZNF528 | LLNL759 | 135 | 5 | | 23 | | E | | A | | nt_contact | |
| ZNF528 | LLNL759 | 160 | 6 | | 20 | | S | | H | | nt_contact | |
| ZNF528 | LLNL759 | 163 | 6 | | 23 | | T | | R | | nt_contact | |
| ZNF528 | LLNL759 | 185 | 7 | | 17 | | R | | H | | nt_contact | |
| ZNF528 | LLNL759 | 191 | 7 | | 23 | | S | | N | | nt_contact | |
| ZNF528 | LLNL759 | 213 | 8 | | 17 | | Q | | Y | | nt_contact | |
| ZNF528 | LLNL759 | 216 | 8 | | 20 | | D | | H | | nt_contact | |
| ZNF528 | LLNL759 | 219 | 8 | | 23 | | R | | Q | | nt_contact | |
| ZNF528 | LLNL759 | 241 | 9 | | 17 | | E | | R | | nt_contact | |
| ZNF528 | LLNL759 | 244 | 9 | | 20 | | D | | C | | nt_contact | |
| ZNF528 | LLNL759 | 247 | 9 | | 23 | | A | | R | | nt_contact | |
| ZNF528 | LLNL759 | 269 | 10 | | 17 | | Y | | D | | nt_contact | |
| ZNF528 | LLNL759 | 272 | 10 | | 20 | | S | | G | | nt_contact | |
| ZNF528 | LLNL759 | 275 | 10 | | 23 | | S | | A | | nt_contact | |
| ZNF528 | LLNL759 | 297 | 11 | | 17 | | R | | H | | nt_contact | |
| ZNF528 | LLNL759 | 300 | 11 | | 20 | | N | | S | | nt_contact | |
| ZNF528 | LLNL759 | 303 | 11 | | 23 | | C | | N | | nt_contact | |
| ZNF528 | LLNL759 | 328 | 12 | | 20 | | Y | | N | | nt_contact | |
| ZNF528 | LLNL759 | 331 | 12 | | 23 | | R | | N | | nt_contact | |
| ZNF528 | LLNL759 | 353 | 13 | | 17 | | G | | H | | nt_contact | |
| ZNF528 | LLNL759 | 356 | 13 | | 20 | | G | | H | | nt_contact | |
| ZNF528 | LLNL759 | 384 | 14 | | 20 | | S | | Y | | nt_contact | |
| ZNF528 | LLNL759 | 387 | 14 | | 23 | | N | | K | | nt_contact | |
| ZNF528 | LLNL759 | 409 | 15 | | 17 | | H | | R | | nt_contact | |
| ZNF528 | LLNL759 | 412 | 15 | | 20 | | D | | N | | nt_contact | |
| ZNF528 | LLNL759 | 44 | 2 | | 16 | | S | | N | | ntc_adjacent | |
| ZNF528 | LLNL759 | 46 | 2 | | 18 | | N | | I | | ntc_adjacent | |
| ZNF528 | LLNL759 | 50 | 2 | | 22 | | S | | A | | ntc_adjacent | |
| ZNF528 | LLNL759 | 72 | 3 | | 16 | | R | | T | | ntc_adjacent | |
| ZNF528 | LLNL759 | 74 | 3 | | 18 | | S | | N | | ntc_adjacent | |
| ZNF528 | LLNL759 | 102 | 4 | | 18 | | I | | N | | ntc_adjacent | |
| ZNF528 | LLNL759 | 106 | 4 | | 22 | | V | | A | | ntc_adjacent | |
| ZNF528 | LLNL759 | 130 | 5 | | 18 | | H | | G | | ntc_adjacent | |
| ZNF528 | LLNL759 | 134 | 5 | | 22 | | A | | T | | ntc_adjacent | |
| ZNF528 | LLNL759 | 158 | 6 | | 18 | | R | | N | | ntc_adjacent | |
| ZNF528 | LLNL759 | 159 | 6 | | 19 | | S | | A | | ntc_adjacent | |
| ZNF528 | LLNL759 | 162 | 6 | | 22 | | I | | T | | ntc_adjacent | |
| ZNF528 | LLNL759 | 184 | 7 | | 16 | | G | | R | | ntc_adjacent | |
| ZNF528 | LLNL759 | 187 | 7 | | 19 | | C | | F | | ntc_adjacent | |
| ZNF528 | LLNL759 | 214 | 8 | | 18 | | K | | N | | ntc_adjacent | |
| ZNF528 | LLNL759 | 218 | 8 | | 22 | | I | | A | | ntc_adjacent | |
| ZNF528 | LLNL759 | 240 | 9 | | 16 | | R | | S | | ntc_adjacent | |
| ZNF528 | LLNL759 | 242 | 9 | | 18 | | F | | L | | ntc_adjacent | |
| ZNF528 | LLNL759 | 296 | 11 | | 16 | | S | | R | | ntc_adjacent | |
| ZNF528 | LLNL759 | 298 | 11 | | 18 | | S | | R | | ntc_adjacent | |
| ZNF528 | LLNL759 | 299 | 11 | | 19 | | S | | L | | ntc_adjacent | |
| ZNF528 | LLNL759 | 302 | 11 | | 22 | | V | | S | | ntc_adjacent | |
| ZNF528 | LLNL759 | 324 | 12 | | 16 | | N | | T | | ntc_adjacent | |
| ZNF528 | LLNL759 | 326 | 12 | | 18 | | A | | N | | ntc_adjacent | |
| ZNF528 | LLNL759 | 330 | 12 | | 22 | | T | | A | | ntc_adjacent | |
| ZNF528 | LLNL759 | 354 | 13 | | 18 | | C | | N | | ntc_adjacent | |
| ZNF528 | LLNL759 | 358 | 13 | | 22 | | T | | A | | ntc_adjacent | |
| ZNF528 | LLNL759 | 380 | 14 | | 16 | | T | | S | | ntc_adjacent | |
| ZNF528 | LLNL759 | 383 | 14 | | 19 | | S | | L | | ntc_adjacent | |
| ZNF528 | LLNL759 | 408 | 15 | | 16 | | S | | T | | ntc_adjacent | |
| ZNF528 | LLNL759 | 1 | 1 | | 1 | | N | | T | | other | |
| ZNF528 | LLNL759 | 12 | 1 | | 12 | | G | | D | | other | |
| ZNF528 | LLNL759 | 25 | 1 | | 25 | | R | | Q | | other | |
| ZNF528 | LLNL759 | 27 | 1 | | 27 | | M | | I | | other | |
| ZNF528 | LLNL759 | 68 | 3 | | 12 | | D | | G | | other | |
| ZNF528 | LLNL759 | 81 | 3 | | 25 | | Q | | H | | other | |
| ZNF528 | LLNL759 | 93 | 4 | | 9 | | H | | N | | other | |
| ZNF528 | LLNL759 | 96 | 4 | | 12 | | D | | G | | other | |
| ZNF528 | LLNL759 | 113 | 5 | | 1 | | T | | S | | other | |
| ZNF528 | LLNL759 | 119 | 5 | | 7 | | S | | K | | other | |
| ZNF528 | LLNL759 | 121 | 5 | | 9 | | N | | K | | other | |
| ZNF528 | LLNL759 | 122 | 5 | | 10 | | K | | E | | other | |
| ZNF528 | LLNL759 | 126 | 5 | | 14 | | V | | A | | other | |
| ZNF528 | LLNL759 | 137 | 5 | | 25 | | Q | | L | | other | |
| ZNF528 | LLNL759 | 138 | 5 | | 26 | | T | | V | | other | |
| ZNF528 | LLNL759 | 139 | 5 | | 27 | | V | | I | | other | |
| ZNF528 | LLNL759 | 145 | 6 | | 5 | | P | | L | | other | |
| ZNF528 | LLNL759 | 150 | 6 | | 10 | | E | | K | | other | |
| ZNF528 | LLNL759 | 154 | 6 | | 14 | | A | | V | | other | |
| ZNF528 | LLNL759 | 166 | 6 | | 26 | | L | | R | | other | |
| ZNF528 | LLNL759 | 171 | 7 | | 3 | | R | | E | | other | |
| ZNF528 | LLNL759 | 175 | 7 | | 7 | | K | | E | | other | |
| ZNF528 | LLNL759 | 180 | 7 | | 12 | | D | | G | | other | |
| ZNF528 | LLNL759 | 193 | 7 | | 25 | | Q | | H | | other | |
| ZNF528 | LLNL759 | 198 | 8 | | 2 | | R | | G | | other | |
| ZNF528 | LLNL759 | 200 | 8 | | 4 | | R | | Q | | other | |
| ZNF528 | LLNL759 | 203 | 8 | | 7 | | G | | K | | other | |
| ZNF528 | LLNL759 | 206 | 8 | | 10 | | Q | | E | | other | |
| ZNF528 | LLNL759 | 210 | 8 | | 14 | | I | | V | | other | |
| ZNF528 | LLNL759 | 221 | 8 | | 25 | | R | | Q | | other | |
| ZNF528 | LLNL759 | 222 | 8 | | 26 | | K | | R | | other | |
| ZNF528 | LLNL759 | 226 | 9 | | 2 | | D | | G | | other | |
| ZNF528 | LLNL759 | 233 | 9 | | 9 | | N | | S | | other | |
| ZNF528 | LLNL759 | 234 | 9 | | 10 | | K | | D | | other | |
| ZNF528 | LLNL759 | 237 | 9 | | 13 | | T | | K | | other | |
| ZNF528 | LLNL759 | 238 | 9 | | 14 | | A | | V | | other | |
| ZNF528 | LLNL759 | 249 | 9 | | 25 | | F | | Q | | other | |
| ZNF528 | LLNL759 | 250 | 9 | | 26 | | L | | R | | other | |
| ZNF528 | LLNL759 | 251 | 9 | | 27 | | I | | V | | other | |
| ZNF528 | LLNL759 | 253 | 10 | | 1 | | S | | T | | other | |
| ZNF528 | LLNL759 | 259 | 10 | | 7 | | E | | K | | other | |
| ZNF528 | LLNL759 | 261 | 10 | | 9 | | K | | N | | other | |
| ZNF528 | LLNL759 | 266 | 10 | | 14 | | V | | A | | other | |
| ZNF528 | LLNL759 | 277 | 10 | | 25 | | H | | L | | other | |
| ZNF528 | LLNL759 | 278 | 10 | | 26 | | R | | L | | other | |
| ZNF528 | LLNL759 | 289 | 11 | | 9 | | N | | K | | other | |
| ZNF528 | LLNL759 | 292 | 11 | | 12 | | G | | A | | other | |
| ZNF528 | LLNL759 | 306 | 11 | | 26 | | K | | R | | other | |
| ZNF528 | LLNL759 | 307 | 11 | | 27 | | I | | F | | other | |
| ZNF528 | LLNL759 | 315 | 12 | | 7 | | K | | R | | other | |
| ZNF528 | LLNL759 | 322 | 12 | | 14 | | V | | D | | other | |
| ZNF528 | LLNL759 | 333 | 12 | | 25 | | Q | | H | | other | |
| ZNF528 | LLNL759 | 334 | 12 | | 26 | | I | | R | | other | |
| ZNF528 | LLNL759 | 340 | 13 | | 4 | | R | | K | | other | |
| ZNF528 | LLNL759 | 343 | 13 | | 7 | | R | | K | | other | |
| ZNF528 | LLNL759 | 346 | 13 | | 10 | | K | | E | | other | |
| ZNF528 | LLNL759 | 350 | 13 | | 14 | | A | | V | | other | |
| ZNF528 | LLNL759 | 361 | 13 | | 25 | | L | | R | | other | |
| ZNF528 | LLNL759 | 362 | 13 | | 26 | | A | | Q | | other | |
| ZNF528 | LLNL759 | 366 | 14 | | 2 | | E | | G | | other | |
| ZNF528 | LLNL759 | 367 | 14 | | 3 | | K | | E | | other | |
| ZNF528 | LLNL759 | 370 | 14 | | 6 | | H | | Y | | other | |
| ZNF528 | LLNL759 | 371 | 14 | | 7 | | E | | K | | other | |
| ZNF528 | LLNL759 | 373 | 14 | | 9 | | K | | N | | other | |
| ZNF528 | LLNL759 | 378 | 14 | | 14 | | I | | V | | other | |
| ZNF528 | LLNL759 | 399 | 15 | | 7 | | K | | R | | other | |
| ZNF528 | LLNL759 | 401 | 15 | | 9 | | T | | H | | other | |
| ZNF528 | LLNL759 | 402 | 15 | | 10 | | L | | E | | other | |
| ZNF528 | LLNL759 | 406 | 15 | | 14 | | V | | D | | other | |
| ZNF528 | LLNL759 | 417 | 15 | | 25 | | Q | | H | | other | |
| ZNF568 | ZNF569 | 17 | 1 | | 17 | | Q | | H | | nt_contact | |
| ZNF568 | ZNF569 | 45 | 2 | | 17 | | H | | R | | nt_contact | |
| ZNF568 | ZNF569 | 48 | 2 | | 20 | | K | | N | | nt_contact | |
| ZNF568 | ZNF569 | 73 | 3 | | 17 | | K | | Q | | nt_contact | |
| ZNF568 | ZNF569 | 107 | 4 | | 23 | | D | | E | | nt_contact | |
| ZNF568 | ZNF569 | 132 | 5 | | 20 | | S | | N | | nt_contact | |
| ZNF568 | ZNF569 | 135 | 5 | | 23 | | A | | E | | nt_contact | |
| ZNF568 | ZNF569 | 188 | 7 | | 20 | | M | | V | | nt_contact | |
| ZNF568 | ZNF569 | 216 | 8 | | 20 | | A | | S | | nt_contact | |
| ZNF568 | ZNF569 | 241 | 9 | | 17 | | H | | R | | nt_contact | |
| ZNF568 | ZNF569 | 303 | 11 | | 23 | | A | | E | | nt_contact | |
| ZNF568 | ZNF569 | 331 | 12 | | 23 | | T | | E | | nt_contact | |
| ZNF568 | ZNF569 | 353 | 13 | | 17 | | Q | | R | | nt_contact | |
| ZNF568 | ZNF569 | 387 | 14 | | 23 | | L | | I | | nt_contact | |
| ZNF568 | ZNF569 | 19 | 1 | | 19 | | L | | F | | ntc_adjacent | |
| ZNF568 | ZNF569 | 156 | 6 | | 16 | | P | | S | | ntc_adjacent | |
| ZNF568 | ZNF569 | 159 | 6 | | 19 | | A | | S | | ntc_adjacent | |
| ZNF568 | ZNF569 | 161 | 6 | | 21 | | L | | V | | ntc_adjacent | |
| ZNF568 | ZNF569 | 186 | 7 | | 18 | | F | | C | | ntc_adjacent | |
| ZNF568 | ZNF569 | 189 | 7 | | 21 | | L | | F | | ntc_adjacent | |
| ZNF568 | ZNF569 | 243 | 9 | | 19 | | K | | E | | ntc_adjacent | |
| ZNF568 | ZNF569 | 245 | 9 | | 21 | | F | | L | | ntc_adjacent | |
| ZNF568 | ZNF569 | 274 | 10 | | 22 | | V | | I | | ntc_adjacent | |
| ZNF568 | ZNF569 | 302 | 11 | | 22 | | I | | T | | ntc_adjacent | |
| ZNF568 | ZNF569 | 326 | 12 | | 18 | | K | | R | | ntc_adjacent | |
| ZNF568 | ZNF569 | 329 | 12 | | 21 | | F | | L | | ntc_adjacent | |
| ZNF568 | ZNF569 | 330 | 12 | | 22 | | I | | L | | ntc_adjacent | |
| ZNF568 | ZNF569 | 355 | 13 | | 19 | | A | | S | | ntc_adjacent | |
| ZNF568 | ZNF569 | 386 | 14 | | 22 | | N | | I | | ntc_adjacent | |
| ZNF568 | ZNF569 | 414 | 15 | | 22 | | I | | S | | ntc_adjacent | |
| ZNF568 | ZNF569 | 10 | 1 | | 10 | | H | | Q | | other | |
| ZNF568 | ZNF569 | 14 | 1 | | 14 | | G | | D | | other | |
| ZNF568 | ZNF569 | 25 | 1 | | 25 | | L | | E | | other | |
| ZNF568 | ZNF569 | 58 | 3 | | 2 | | R | | G | | other | |
| ZNF568 | ZNF569 | 60 | 3 | | 4 | | Q | | K | | other | |
| ZNF568 | ZNF569 | 94 | 4 | | 10 | | E | | D | | other | |
| ZNF568 | ZNF569 | 98 | 4 | | 14 | | S | | A | | other | |
| ZNF568 | ZNF569 | 110 | 4 | | 26 | | K | | R | | other | |
| ZNF568 | ZNF569 | 137 | 5 | | 25 | | Q | | E | | other | |
| ZNF568 | ZNF569 | 139 | 5 | | 27 | | V | | I | | other | |
| ZNF568 | ZNF569 | 153 | 6 | | 13 | | K | | R | | other | |
| ZNF568 | ZNF569 | 177 | 7 | | 9 | | D | | N | | other | |
| ZNF568 | ZNF569 | 193 | 7 | | 25 | | V | | M | | other | |
| ZNF568 | ZNF569 | 223 | 8 | | 27 | | S | | N | | other | |
| ZNF568 | ZNF569 | 236 | 9 | | 12 | | R | | G | | other | |
| ZNF568 | ZNF569 | 289 | 11 | | 9 | | K | | T | | other | |
| ZNF568 | ZNF569 | 290 | 11 | | 10 | | E | | V | | other | |
| ZNF568 | ZNF569 | 309 | 12 | | 1 | | S | | T | | other | |
| ZNF568 | ZNF569 | 315 | 12 | | 7 | | E | | H | | other | |
| ZNF568 | ZNF569 | 318 | 12 | | 10 | | E | | Q | | other | |
| ZNF568 | ZNF569 | 333 | 12 | | 25 | | Q | | E | | other | |
| ZNF568 | ZNF569 | 335 | 12 | | 27 | | V | | I | | other | |
| ZNF568 | ZNF569 | 342 | 13 | | 6 | | Y | | F | | other | |
| ZNF568 | ZNF569 | 343 | 13 | | 7 | | D | | K | | other | |
| ZNF568 | ZNF569 | 361 | 13 | | 25 | | L | | V | | other | |
| ZNF568 | ZNF569 | 417 | 15 | | 25 | | M | | K | | other | |
| ZNF570 | ZNF583 | 104 | 4 | | 20 | | Y | | H | | nt_contact | |
| ZNF570 | ZNF583 | 132 | 5 | | 20 | | S | | F | | nt_contact | |
| ZNF570 | ZNF583 | 157 | 6 | | 17 | | L | | H | | nt_contact | |
| ZNF570 | ZNF583 | 275 | 10 | | 23 | | Q | | L | | nt_contact | |
| ZNF570 | ZNF583 | 16 | 1 | | 16 | | S | | N | | ntc_adjacent | |
| ZNF570 | ZNF583 | 46 | 2 | | 18 | | R | | S | | ntc_adjacent | |
| ZNF570 | ZNF583 | 47 | 2 | | 19 | | S | | A | | ntc_adjacent | |
| ZNF570 | ZNF583 | 50 | 2 | | 22 | | V | | A | | ntc_adjacent | |
| ZNF570 | ZNF583 | 78 | 3 | | 22 | | V | | A | | ntc_adjacent | |
| ZNF570 | ZNF583 | 102 | 4 | | 18 | | F | | I | | ntc_adjacent | |
| ZNF570 | ZNF583 | 106 | 4 | | 22 | | A | | T | | ntc_adjacent | |
| ZNF570 | ZNF583 | 130 | 5 | | 18 | | R | | G | | ntc_adjacent | |
| ZNF570 | ZNF583 | 133 | 5 | | 21 | | I | | L | | ntc_adjacent | |
| ZNF570 | ZNF583 | 159 | 6 | | 19 | | A | | G | | ntc_adjacent | |
| ZNF570 | ZNF583 | 162 | 6 | | 22 | | T | | I | | ntc_adjacent | |
| ZNF570 | ZNF583 | 186 | 7 | | 18 | | N | | Y | | ntc_adjacent | |
| ZNF570 | ZNF583 | 187 | 7 | | 19 | | S | | A | | ntc_adjacent | |
| ZNF570 | ZNF583 | 218 | 8 | | 22 | | A | | D | | ntc_adjacent | |
| ZNF570 | ZNF583 | 242 | 9 | | 18 | | D | | S | | ntc_adjacent | |
| ZNF570 | ZNF583 | 246 | 9 | | 22 | | T | | A | | ntc_adjacent | |
| ZNF570 | ZNF583 | 270 | 10 | | 18 | | C | | S | | ntc_adjacent | |
| ZNF570 | ZNF583 | 274 | 10 | | 22 | | A | | T | | ntc_adjacent | |
| ZNF570 | ZNF583 | 298 | 11 | | 18 | | H | | R | | ntc_adjacent | |
| ZNF570 | ZNF583 | 35 | 2 | | 7 | | K | | A | | other | |
| ZNF570 | ZNF583 | 81 | 3 | | 25 | | L | | Q | | other | |
| ZNF570 | ZNF583 | 91 | 4 | | 7 | | E | | Q | | other | |
| ZNF570 | ZNF583 | 96 | 4 | | 12 | | R | | K | | other | |
| ZNF570 | ZNF583 | 116 | 5 | | 4 | | K | | R | | other | |
| ZNF570 | ZNF583 | 118 | 5 | | 6 | | Y | | F | | other | |
| ZNF570 | ZNF583 | 139 | 5 | | 27 | | V | | I | | other | |
| ZNF570 | ZNF583 | 147 | 6 | | 7 | | E | | V | | other | |
| ZNF570 | ZNF583 | 180 | 7 | | 12 | | G | | R | | other | |
| ZNF570 | ZNF583 | 195 | 7 | | 27 | | I | | V | | other | |
| ZNF570 | ZNF583 | 203 | 8 | | 7 | | K | | E | | other | |
| ZNF570 | ZNF583 | 205 | 8 | | 9 | | Q | | K | | other | |
| ZNF570 | ZNF583 | 251 | 9 | | 27 | | V | | I | | other | |
| ZNF570 | ZNF583 | 290 | 11 | | 10 | | E | | D | | other | |
| ZNF570 | ZNF583 | 292 | 11 | | 12 | | K | | R | | other | |
| ZNF570 | ZNF583 | 294 | 11 | | 14 | | T | | S | | other | |
| ZNF570 | ZNF583 | 305 | 11 | | 25 | | Q | | E | | other | |
| ZNF619 | ZNF621 | 45 | 2 | | 17 | | S | | C | | nt_contact | |
| ZNF619 | ZNF621 | 160 | 6 | | 20 | | A | | T | | nt_contact | |
| ZNF619 | ZNF621 | 16 | 1 | | 16 | | R | | S | | ntc_adjacent | |
| ZNF619 | ZNF621 | 75 | 3 | | 19 | | T | | S | | ntc_adjacent | |
| ZNF619 | ZNF621 | 105 | 4 | | 21 | | Y | | F | | ntc_adjacent | |
| ZNF619 | ZNF621 | 128 | 5 | | 16 | | G | | S | | ntc_adjacent | |
| ZNF619 | ZNF621 | 130 | 5 | | 18 | | R | | S | | ntc_adjacent | |
| ZNF619 | ZNF621 | 161 | 6 | | 21 | | S | | L | | ntc_adjacent | |
| ZNF619 | ZNF621 | 162 | 6 | | 22 | | I | | V | | ntc_adjacent | |
| ZNF619 | ZNF621 | 190 | 7 | | 22 | | V | | I | | ntc_adjacent | |
| ZNF619 | ZNF621 | 5 | 1 | | 5 | | F | | P | | other | |
| ZNF619 | ZNF621 | 10 | 1 | | 10 | | E | | D | | other | |
| ZNF619 | ZNF621 | 27 | 1 | | 27 | | S | | I | | other | |
| ZNF619 | ZNF621 | 54 | 2 | | 26 | | K | | R | | other | |
| ZNF619 | ZNF621 | 55 | 2 | | 27 | | N | | I | | other | |
| ZNF619 | ZNF621 | 60 | 3 | | 4 | | G | | K | | other | |
| ZNF619 | ZNF621 | 70 | 3 | | 14 | | G | | S | | other | |
| ZNF675 | ZNF681 | 20 | 1 | | 20 | | N | | H | | nt_contact | |
| ZNF675 | ZNF681 | 23 | 1 | | 23 | | T | | R | | nt_contact | |
| ZNF675 | ZNF681 | 48 | 2 | | 20 | | T | | H | | nt_contact | |
| ZNF675 | ZNF681 | 73 | 3 | | 17 | | R | | K | | nt_contact | |
| ZNF675 | ZNF681 | 76 | 3 | | 20 | | K | | H | | nt_contact | |
| ZNF675 | ZNF681 | 79 | 3 | | 23 | | E | | R | | nt_contact | |
| ZNF675 | ZNF681 | 101 | 4 | | 17 | | R | | Q | | nt_contact | |
| ZNF675 | ZNF681 | 129 | 5 | | 17 | | H | | Q | | nt_contact | |
| ZNF675 | ZNF681 | 132 | 5 | | 20 | | A | | N | | nt_contact | |
| ZNF675 | ZNF681 | 157 | 6 | | 17 | | R | | Q | | nt_contact | |
| ZNF675 | ZNF681 | 160 | 6 | | 20 | | K | | I | | nt_contact | |
| ZNF675 | ZNF681 | 163 | 6 | | 23 | | E | | T | | nt_contact | |
| ZNF675 | ZNF681 | 185 | 7 | | 17 | | Q | | R | | nt_contact | |
| ZNF675 | ZNF681 | 216 | 8 | | 20 | | S | | H | | nt_contact | |
| ZNF675 | ZNF681 | 241 | 9 | | 17 | | R | | Q | | nt_contact | |
| ZNF675 | ZNF681 | 244 | 9 | | 20 | | K | | H | | nt_contact | |
| ZNF675 | ZNF681 | 247 | 9 | | 23 | | E | | R | | nt_contact | |
| ZNF675 | ZNF681 | 18 | 1 | | 18 | | F | | S | | ntc_adjacent | |
| ZNF675 | ZNF681 | 44 | 2 | | 16 | | T | | R | | ntc_adjacent | |
| ZNF675 | ZNF681 | 184 | 7 | | 16 | | I | | Y | | ntc_adjacent | |
| ZNF675 | ZNF681 | 212 | 8 | | 16 | | K | | N | | ntc_adjacent | |
| ZNF675 | ZNF681 | 271 | 10 | | 19 | | A | | S | | ntc_adjacent | |
| ZNF675 | ZNF681 | 26 | 1 | | 26 | | K | | I | | other | |
| ZNF675 | ZNF681 | 32 | 2 | | 4 | | Q | | K | | other | |
| ZNF675 | ZNF681 | 82 | 3 | | 26 | | N | | S | | other | |
| ZNF675 | ZNF681 | 88 | 4 | | 4 | | Q | | K | | other | |
| ZNF675 | ZNF681 | 91 | 4 | | 7 | | K | | Q | | other | |
| ZNF675 | ZNF681 | 94 | 4 | | 10 | | E | | K | | other | |
| ZNF675 | ZNF681 | 99 | 4 | | 15 | | F | | S | | other | |
| ZNF675 | ZNF681 | 110 | 4 | | 26 | | K | | N | | other | |
| ZNF675 | ZNF681 | 121 | 5 | | 9 | | K | | E | | other | |
| ZNF675 | ZNF681 | 166 | 6 | | 26 | | K | | R | | other | |
| ZNF675 | ZNF681 | 167 | 6 | | 27 | | L | | I | | other | |
| ZNF675 | ZNF681 | 171 | 7 | | 3 | | K | | E | | other | |
| ZNF675 | ZNF681 | 173 | 7 | | 5 | | P | | S | | other | |
| ZNF675 | ZNF681 | 200 | 8 | | 4 | | I | | K | | other | |
| ZNF675 | ZNF681 | 203 | 8 | | 7 | | K | | T | | other | |
| ZNF675 | ZNF681 | 222 | 8 | | 26 | | R | | V | | other | |
| ZNF675 | ZNF681 | 231 | 9 | | 7 | | K | | Q | | other | |
| ZNF675 | ZNF681 | 250 | 9 | | 26 | | I | | R | | other | |
| ZNF675 | ZNF681 | 259 | 10 | | 7 | | K | | Q | | other | |
| ZNF675 | ZNF681 | 262 | 10 | | 10 | | R | | K | | other | |
| ZNF81 | ZNF175 | 73 | 3 | | 17 | | Q | | L | | nt_contact | |
| ZNF81 | ZNF175 | 76 | 3 | | 20 | | T | | A | | nt_contact | |
| ZNF81 | ZNF175 | 107 | 4 | | 23 | | L | | M | | nt_contact | |
| ZNF81 | ZNF175 | 135 | 5 | | 23 | | V | | A | | nt_contact | |
| ZNF81 | ZNF175 | 163 | 6 | | 23 | | I | | M | | nt_contact | |
| ZNF81 | ZNF175 | 185 | 7 | | 17 | | Q | | N | | nt_contact | |
| ZNF81 | ZNF175 | 188 | 7 | | 20 | | H | | N | | nt_contact | |
| ZNF81 | ZNF175 | 191 | 7 | | 23 | | I | | T | | nt_contact | |
| ZNF81 | ZNF175 | 213 | 8 | | 17 | | Q | | D | | nt_contact | |
| ZNF81 | ZNF175 | 216 | 8 | | 20 | | I | | N | | nt_contact | |
| ZNF81 | ZNF175 | 219 | 8 | | 23 | | M | | K | | nt_contact | |
| ZNF81 | ZNF175 | 241 | 9 | | 17 | | S | | Q | | nt_contact | |
| ZNF81 | ZNF175 | 244 | 9 | | 20 | | Q | | E | | nt_contact | |
| ZNF81 | ZNF175 | 247 | 9 | | 23 | | E | | T | | nt_contact | |
| ZNF81 | ZNF175 | 272 | 10 | | 20 | | E | | H | | nt_contact | |
| ZNF81 | ZNF175 | 300 | 11 | | 20 | | Q | | N | | nt_contact | |
| ZNF81 | ZNF175 | 303 | 11 | | 23 | | V | | K | | nt_contact | |
| ZNF81 | ZNF175 | 325 | 12 | | 17 | | N | | Q | | nt_contact | |
| ZNF81 | ZNF175 | 328 | 12 | | 20 | | N | | V | | nt_contact | |
| ZNF81 | ZNF175 | 331 | 12 | | 23 | | K | | M | | nt_contact | |
| ZNF81 | ZNF175 | 46 | 2 | | 18 | | M | | V | | ntc_adjacent | |
| ZNF81 | ZNF175 | 47 | 2 | | 19 | | L | | S | | ntc_adjacent | |
| ZNF81 | ZNF175 | 50 | 2 | | 22 | | F | | L | | ntc_adjacent | |
| ZNF81 | ZNF175 | 106 | 4 | | 22 | | S | | R | | ntc_adjacent | |
| ZNF81 | ZNF175 | 156 | 6 | | 16 | | I | | P | | ntc_adjacent | |
| ZNF81 | ZNF175 | 162 | 6 | | 22 | | D | | Q | | ntc_adjacent | |
| ZNF81 | ZNF175 | 186 | 7 | | 18 | | K | | R | | ntc_adjacent | |
| ZNF81 | ZNF175 | 212 | 8 | | 16 | | N | | T | | ntc_adjacent | |
| ZNF81 | ZNF175 | 214 | 8 | | 18 | | K | | R | | ntc_adjacent | |
| ZNF81 | ZNF175 | 217 | 8 | | 21 | | L | | F | | ntc_adjacent | |
| ZNF81 | ZNF175 | 218 | 8 | | 22 | | S | | N | | ntc_adjacent | |
| ZNF81 | ZNF175 | 240 | 9 | | 16 | | T | | I | | ntc_adjacent | |
| ZNF81 | ZNF175 | 245 | 9 | | 21 | | F | | L | | ntc_adjacent | |
| ZNF81 | ZNF175 | 268 | 10 | | 16 | | N | | S | | ntc_adjacent | |
| ZNF81 | ZNF175 | 271 | 10 | | 19 | | S | | P | | ntc_adjacent | |
| ZNF81 | ZNF175 | 296 | 11 | | 16 | | S | | T | | ntc_adjacent | |
| ZNF81 | ZNF175 | 298 | 11 | | 18 | | K | | R | | ntc_adjacent | |
| ZNF81 | ZNF175 | 299 | 11 | | 19 | | P | | S | | ntc_adjacent | |
| ZNF81 | ZNF175 | 301 | 11 | | 21 | | L | | F | | ntc_adjacent | |
| ZNF81 | ZNF175 | 324 | 12 | | 16 | | N | | T | | ntc_adjacent | |
| ZNF81 | ZNF175 | 326 | 12 | | 18 | | R | | K | | ntc_adjacent | |
| ZNF81 | ZNF175 | 329 | 12 | | 21 | | F | | L | | ntc_adjacent | |
| ZNF81 | ZNF175 | 330 | 12 | | 22 | | N | | S | | ntc_adjacent | |
| ZNF81 | ZNF175 | 1 | 1 | | 1 | | T | | R | | other | |
| ZNF81 | ZNF175 | 5 | 1 | | 5 | | P | | L | | other | |
| ZNF81 | ZNF175 | 14 | 1 | | 14 | | V | | A | | other | |
| ZNF81 | ZNF175 | 31 | 2 | | 3 | | K | | E | | other | |
| ZNF81 | ZNF175 | 54 | 2 | | 26 | | R | | T | | other | |
| ZNF81 | ZNF175 | 90 | 4 | | 6 | | Y | | H | | other | |
| ZNF81 | ZNF175 | 116 | 5 | | 4 | | K | | R | | other | |
| ZNF81 | ZNF175 | 119 | 5 | | 7 | | V | | I | | other | |
| ZNF81 | ZNF175 | 121 | 5 | | 9 | | I | | T | | other | |
| ZNF81 | ZNF175 | 149 | 6 | | 9 | | H | | S | | other | |
| ZNF81 | ZNF175 | 165 | 6 | | 25 | | H | | K | | other | |
| ZNF81 | ZNF175 | 195 | 7 | | 27 | | I | | S | | other | |
| ZNF81 | ZNF175 | 200 | 8 | | 4 | | R | | K | | other | |
| ZNF81 | ZNF175 | 203 | 8 | | 7 | | V | | I | | other | |
| ZNF81 | ZNF175 | 222 | 8 | | 26 | | R | | T | | other | |
| ZNF81 | ZNF175 | 231 | 9 | | 7 | | K | | V | | other | |
| ZNF81 | ZNF175 | 237 | 9 | | 13 | | K | | R | | other | |
| ZNF81 | ZNF175 | 254 | 10 | | 2 | | G | | T | | other | |
| ZNF81 | ZNF175 | 259 | 10 | | 7 | | V | | K | | other | |
| ZNF81 | ZNF175 | 264 | 10 | | 12 | | G | | E | | other | |
| ZNF81 | ZNF175 | 266 | 10 | | 14 | | A | | S | | other | |
| ZNF81 | ZNF175 | 279 | 10 | | 27 | | T | | I | | other | |
| ZNF81 | ZNF175 | 290 | 11 | | 10 | | D | | E | | other | |
| ZNF81 | ZNF175 | 306 | 11 | | 26 | | R | | T | | other | |
| ZNF81 | ZNF175 | 311 | 12 | | 3 | | E | | D | | other | |
| ZNF81 | ZNF175 | 333 | 12 | | 25 | | Q | | R | | other | |
| ZNF81 | ZNF175 | 334 | 12 | | 26 | | T | | N | | other | |
| ZNF81 | ZNF175 | 335 | 12 | | 27 | | T | | I | | other | |
| ZNF836 | ZNF841 | 45 | 2 | | 17 | | Q | | K | | nt_contact | |
| ZNF836 | ZNF841 | 48 | 2 | | 20 | | N | | H | | nt_contact | |
| ZNF836 | ZNF841 | 51 | 2 | | 23 | | I | | V | | nt_contact | |
| ZNF836 | ZNF841 | 76 | 3 | | 20 | | N | | S | | nt_contact | |
| ZNF836 | ZNF841 | 160 | 6 | | 20 | | H | | R | | nt_contact | |
| ZNF836 | ZNF841 | 188 | 7 | | 20 | | L | | H | | nt_contact | |
| ZNF836 | ZNF841 | 191 | 7 | | 23 | | R | | V | | nt_contact | |
| ZNF836 | ZNF841 | 213 | 8 | | 17 | | E | | W | | nt_contact | |
| ZNF836 | ZNF841 | 216 | 8 | | 20 | | C | | L | | nt_contact | |
| ZNF836 | ZNF841 | 244 | 9 | | 20 | | N | | Y | | nt_contact | |
| ZNF836 | ZNF841 | 247 | 9 | | 23 | | I | | V | | nt_contact | |
| ZNF836 | ZNF841 | 269 | 10 | | 17 | | N | | Y | | nt_contact | |
| ZNF836 | ZNF841 | 303 | 11 | | 23 | | N | | I | | nt_contact | |
| ZNF836 | ZNF841 | 384 | 14 | | 20 | | G | | S | | nt_contact | |
| ZNF836 | ZNF841 | 412 | 15 | | 20 | | N | | T | | nt_contact | |
| ZNF836 | ZNF841 | 47 | 2 | | 19 | | Y | | S | | ntc_adjacent | |
| ZNF836 | ZNF841 | 102 | 4 | | 18 | | S | | N | | ntc_adjacent | |
| ZNF836 | ZNF841 | 128 | 5 | | 16 | | S | | Y | | ntc_adjacent | |
| ZNF836 | ZNF841 | 156 | 6 | | 16 | | S | | F | | ntc_adjacent | |
| ZNF836 | ZNF841 | 184 | 7 | | 16 | | K | | S | | ntc_adjacent | |
| ZNF836 | ZNF841 | 186 | 7 | | 18 | | G | | H | | ntc_adjacent | |
| ZNF836 | ZNF841 | 190 | 7 | | 22 | | T | | A | | ntc_adjacent | |
| ZNF836 | ZNF841 | 212 | 8 | | 16 | | S | | N | | ntc_adjacent | |
| ZNF836 | ZNF841 | 214 | 8 | | 18 | | N | | G | | ntc_adjacent | |
| ZNF836 | ZNF841 | 218 | 8 | | 22 | | V | | T | | ntc_adjacent | |
| ZNF836 | ZNF841 | 242 | 9 | | 18 | | S | | G | | ntc_adjacent | |
| ZNF836 | ZNF841 | 268 | 10 | | 16 | | R | | T | | ntc_adjacent | |
| ZNF836 | ZNF841 | 296 | 11 | | 16 | | N | | I | | ntc_adjacent | |
| ZNF836 | ZNF841 | 382 | 14 | | 18 | | I | | K | | ntc_adjacent | |
| ZNF836 | ZNF841 | 386 | 14 | | 22 | | T | | V | | ntc_adjacent | |
| ZNF836 | ZNF841 | 411 | 15 | | 19 | | S | | T | | ntc_adjacent | |
| ZNF836 | ZNF841 | 31 | 2 | | 3 | | E | | D | | other | |
| ZNF836 | ZNF841 | 35 | 2 | | 7 | | K | | I | | other | |
| ZNF836 | ZNF841 | 70 | 3 | | 14 | | S | | C | | other | |
| ZNF836 | ZNF841 | 87 | 4 | | 3 | | N | | D | | other | |
| ZNF836 | ZNF841 | 113 | 5 | | 1 | | T | | A | | other | |
| ZNF836 | ZNF841 | 115 | 5 | | 3 | | E | | K | | other | |
| ZNF836 | ZNF841 | 124 | 5 | | 12 | | D | | G | | other | |
| ZNF836 | ZNF841 | 138 | 5 | | 26 | | R | | I | | other | |
| ZNF836 | ZNF841 | 139 | 5 | | 27 | | S | | I | | other | |
| ZNF836 | ZNF841 | 144 | 6 | | 4 | | K | | T | | other | |
| ZNF836 | ZNF841 | 178 | 7 | | 10 | | K | | E | | other | |
| ZNF836 | ZNF841 | 182 | 7 | | 14 | | A | | V | | other | |
| ZNF836 | ZNF841 | 194 | 7 | | 26 | | I | | R | | other | |
| ZNF836 | ZNF841 | 201 | 8 | | 5 | | R | | P | | other | |
| ZNF836 | ZNF841 | 203 | 8 | | 7 | | Q | | K | | other | |
| ZNF836 | ZNF841 | 210 | 8 | | 14 | | V | | A | | other | |
| ZNF836 | ZNF841 | 221 | 8 | | 25 | | L | | Q | | other | |
| ZNF836 | ZNF841 | 228 | 9 | | 4 | | Q | | K | | other | |
| ZNF836 | ZNF841 | 249 | 9 | | 25 | | K | | M | | other | |
| ZNF836 | ZNF841 | 251 | 9 | | 27 | | I | | C | | other | |
| ZNF836 | ZNF841 | 258 | 10 | | 6 | | F | | L | | other | |
| ZNF836 | ZNF841 | 262 | 10 | | 10 | | E | | K | | other | |
| ZNF836 | ZNF841 | 277 | 10 | | 25 | | L | | Q | | other | |
| ZNF836 | ZNF841 | 279 | 10 | | 27 | | I | | M | | other | |
| ZNF836 | ZNF841 | 283 | 11 | | 3 | | Q | | E | | other | |
| ZNF836 | ZNF841 | 305 | 11 | | 25 | | K | | R | | other | |
| ZNF836 | ZNF841 | 307 | 11 | | 27 | | I | | S | | other | |
| ZNF836 | ZNF841 | 374 | 14 | | 10 | | H | | E | | other | |
| ZNF836 | ZNF841 | 405 | 15 | | 13 | | Q | | K | | other | |
|  |  |  |  | |  | |  | |  | |  | |
| Absolute position - position of the site in the concatenation of all canonical zinc fingers (sequences before the first finger or after the last finger and sequences corresponding to finger indels and defective fingers were removed). Zinc finger number - the zinc finger affected, numbered from left to right in the concatenation of all canonical ZF domains. Position within zinc finger - the position within the ZF domain, defined as starting 7 residues before the first zinc-coordinating C residue and ending at the second zinc-coordinating H residue. Residue 1 and residue 2 - the amino acids present at the site in gene 1 and gene 2 respectively. Only sites at which all orthologs of each gene had the same amino acid were counted. Type - classification of the type of residue affected (see Table 1). | | | | | | | | | | | | |
|  |  |  | |  | |  | |  | |  | |  |
|  |  |  | |  | |  | |  | |  | |  |
| **Specific sites of change in duplicates with an inferred ancestral gene.** | | | | | | | | | | | | |
|  |  |  | |  | |  | |  | |  | |  |
| gene 1 | gene 2 | absolute position | | zinc finger number | | position within zinc finger | | residue 1 | | residue 2 | | type |
| ZNF431 | ZNF714 | 73 | | 3 | | 17 | | Q | | H | | nt_contact |
| ZNF431 | ZNF714 | 101 | | 4 | | 17 | | R | | H | | nt_contact |
| ZNF431 | ZNF714 | 129 | | 5 | | 17 | | Q | | H | | nt_contact |
| ZNF431 | ZNF714 | 132 | | 5 | | 20 | | T | | A | | nt_contact |
| ZNF431 | ZNF714 | 213 | | 8 | | 17 | | E | | V | | nt_contact |
| ZNF431 | ZNF714 | 216 | | 8 | | 20 | | N | | H | | nt_contact |
| ZNF431 | ZNF714 | 241 | | 9 | | 17 | | R | | H | | nt_contact |
| ZNF431 | ZNF714 | 244 | | 9 | | 20 | | Q | | K | | nt_contact |
| ZNF431 | ZNF714 | 272 | | 10 | | 20 | | I | | N | | nt_contact |
| ZNF431 | ZNF714 | 275 | | 10 | | 23 | | T | | K | | nt_contact |
| ZNF431 | ZNF714 | 303 | | 11 | | 23 | | K | | T | | nt_contact |
| ZNF431 | ZNF714 | 325 | | 12 | | 17 | | Q | | R | | nt_contact |
| ZNF431 | ZNF714 | 328 | | 12 | | 20 | | T | | N | | nt_contact |
| ZNF431 | ZNF714 | 22 | | 1 | | 22 | | S | | H | | ntc_adjacent |
| ZNF431 | ZNF714 | 100 | | 4 | | 16 | | N | | Y | | ntc_adjacent |
| ZNF431 | ZNF714 | 130 | | 5 | | 18 | | S | | P | | ntc_adjacent |
| ZNF431 | ZNF714 | 243 | | 9 | | 19 | | P | | S | | ntc_adjacent |
| ZNF431 | ZNF714 | 268 | | 10 | | 16 | | S | | N | | ntc_adjacent |
| ZNF431 | ZNF714 | 3 | | 1 | | 3 | | K | | E | | other |
| ZNF431 | ZNF714 | 12 | | 1 | | 12 | | G | | D | | other |
| ZNF431 | ZNF714 | 13 | | 1 | | 13 | | K | | E | | other |
| ZNF431 | ZNF714 | 40 | | 2 | | 12 | | G | | D | | other |
| ZNF431 | ZNF714 | 42 | | 2 | | 14 | | A | | V | | other |
| ZNF431 | ZNF714 | 82 | | 3 | | 26 | | I | | M | | other |
| ZNF431 | ZNF714 | 118 | | 5 | | 6 | | Y | | F | | other |
| ZNF431 | ZNF714 | 142 | | 6 | | 2 | | G | | K | | other |
| ZNF431 | ZNF714 | 169 | | 7 | | 1 | | T | | S | | other |
| ZNF431 | ZNF714 | 206 | | 8 | | 10 | | V | | E | | other |
| ZNF431 | ZNF714 | 278 | | 10 | | 26 | | R | | I | | other |
| ZNF431 | ZNF714 | 285 | | 11 | | 5 | | P | | L | | other |
| ZNF431 | ZNF714 | 306 | | 11 | | 26 | | I | | R | | other |
| ZNF431 | ZNF714 | 313 | | 12 | | 5 | | S | | P | | other |
| ZNF431 | ZNF714 | 334 | | 12 | | 26 | | K | | I | | other |
|  |  |  | |  | |  | |  | |  | |  |
| ZNF679 | ZNF716 | 23 | | 1 | | 23 | | K | | R | | nt_contact |
| ZNF679 | ZNF716 | 48 | | 2 | | 20 | | T | | S | | nt_contact |
| ZNF679 | ZNF716 | 104 | | 4 | | 20 | | S | | T | | nt_contact |
| ZNF679 | ZNF716 | 44 | | 2 | | 16 | | T | | S | | ntc_adjacent |
| ZNF679 | ZNF716 | 47 | | 2 | | 19 | | S | | A | | ntc_adjacent |
| ZNF679 | ZNF716 | 78 | | 3 | | 22 | | A | | T | | ntc_adjacent |
| ZNF679 | ZNF716 | 102 | | 4 | | 18 | | S | | P | | ntc_adjacent |
| ZNF679 | ZNF716 | 105 | | 4 | | 21 | | L | | F | | ntc_adjacent |
| ZNF679 | ZNF716 | 156 | | 6 | | 16 | | A | | T | | ntc_adjacent |
| ZNF679 | ZNF716 | 186 | | 7 | | 18 | | S | | H | | ntc_adjacent |
| ZNF679 | ZNF716 | 4 | | 1 | | 4 | | N | | K | | other |
| ZNF679 | ZNF716 | 69 | | 3 | | 13 | | Q | | K | | other |
| ZNF679 | ZNF716 | 119 | | 5 | | 7 | | T | | K | | other |
| ZNF679 | ZNF716 | 145 | | 6 | | 5 | | P | | L | | other |
| ZNF679 | ZNF716 | 172 | | 7 | | 4 | | E | | K | | other |
| ZNF679 | ZNF716 | 181 | | 7 | | 13 | | K | | Q | | other |
| ZNF679 | ZNF716 | 194 | | 7 | | 26 | | S | | N | | other |
|  |  |  | |  | |  | |  | |  | |  |
| ZNF160 | ZNF665 | 73 | | 3 | | 17 | | H | | Q | | nt_contact |
| ZNF160 | ZNF665 | 76 | | 3 | | 20 | | Y | | N | | nt_contact |
| ZNF160 | ZNF665 | 79 | | 3 | | 23 | | T | | G | | nt_contact |
| ZNF160 | ZNF665 | 101 | | 4 | | 17 | | G | | A | | nt_contact |
| ZNF160 | ZNF665 | 104 | | 4 | | 20 | | N | | K | | nt_contact |
| ZNF160 | ZNF665 | 163 | | 6 | | 23 | | I | | T | | nt_contact |
| ZNF160 | ZNF665 | 185 | | 7 | | 17 | | Y | | H | | nt_contact |
| ZNF160 | ZNF665 | 191 | | 7 | | 23 | | R | | K | | nt_contact |
| ZNF160 | ZNF665 | 219 | | 8 | | 23 | | T | | K | | nt_contact |
| ZNF160 | ZNF665 | 244 | | 9 | | 20 | | Q | | H | | nt_contact |
| ZNF160 | ZNF665 | 353 | | 13 | | 17 | | D | | V | | nt_contact |
| ZNF160 | ZNF665 | 409 | | 15 | | 17 | | M | | V | | nt_contact |
| ZNF160 | ZNF665 | 468 | | 17 | | 20 | | S | | T | | nt_contact |
| ZNF160 | ZNF665 | 496 | | 18 | | 20 | | H | | N | | nt_contact |
| ZNF160 | ZNF665 | 499 | | 18 | | 23 | | N | | K | | nt_contact |
| ZNF160 | ZNF665 | 72 | | 3 | | 16 | | R | | S | | ntc_adjacent |
| ZNF160 | ZNF665 | 74 | | 3 | | 18 | | N | | P | | ntc_adjacent |
| ZNF160 | ZNF665 | 134 | | 5 | | 22 | | I | | A | | ntc_adjacent |
| ZNF160 | ZNF665 | 162 | | 6 | | 22 | | A | | T | | ntc_adjacent |
| ZNF160 | ZNF665 | 218 | | 8 | | 22 | | A | | T | | ntc_adjacent |
| ZNF160 | ZNF665 | 242 | | 9 | | 18 | | N | | Y | | ntc_adjacent |
| ZNF160 | ZNF665 | 298 | | 11 | | 18 | | K | | N | | ntc_adjacent |
| ZNF160 | ZNF665 | 302 | | 11 | | 22 | | R | | A | | ntc_adjacent |
| ZNF160 | ZNF665 | 324 | | 12 | | 16 | | A | | S | | ntc_adjacent |
| ZNF160 | ZNF665 | 354 | | 13 | | 18 | | R | | H | | ntc_adjacent |
| ZNF160 | ZNF665 | 414 | | 15 | | 22 | | T | | A | | ntc_adjacent |
| ZNF160 | ZNF665 | 495 | | 18 | | 19 | | A | | S | | ntc_adjacent |
| ZNF160 | ZNF665 | 5 | | 1 | | 5 | | P | | H | | other |
| ZNF160 | ZNF665 | 9 | | 1 | | 9 | | N | | D | | other |
| ZNF160 | ZNF665 | 14 | | 1 | | 14 | | A | | V | | other |
| ZNF160 | ZNF665 | 25 | | 1 | | 25 | | R | | K | | other |
| ZNF160 | ZNF665 | 29 | | 2 | | 1 | | S | | T | | other |
| ZNF160 | ZNF665 | 35 | | 2 | | 7 | | K | | Q | | other |
| ZNF160 | ZNF665 | 37 | | 2 | | 9 | | S | | N | | other |
| ZNF160 | ZNF665 | 42 | | 2 | | 14 | | T | | A | | other |
| ZNF160 | ZNF665 | 110 | | 4 | | 26 | | L | | V | | other |
| ZNF160 | ZNF665 | 118 | | 5 | | 6 | | F | | Y | | other |
| ZNF160 | ZNF665 | 126 | | 5 | | 14 | | L | | C | | other |
| ZNF160 | ZNF665 | 137 | | 5 | | 25 | | W | | R | | other |
| ZNF160 | ZNF665 | 222 | | 8 | | 26 | | V | | I | | other |
| ZNF160 | ZNF665 | 227 | | 9 | | 3 | | T | | E | | other |
| ZNF160 | ZNF665 | 236 | | 9 | | 12 | | S | | V | | other |
| ZNF160 | ZNF665 | 259 | | 10 | | 7 | | K | | R | | other |
| ZNF160 | ZNF665 | 261 | | 10 | | 9 | | N | | D | | other |
| ZNF160 | ZNF665 | 281 | | 11 | | 1 | | S | | T | | other |
| ZNF160 | ZNF665 | 289 | | 11 | | 9 | | I | | N | | other |
| ZNF160 | ZNF665 | 290 | | 11 | | 10 | | E | | D | | other |
| ZNF160 | ZNF665 | 294 | | 11 | | 14 | | S | | V | | other |
| ZNF160 | ZNF665 | 322 | | 12 | | 14 | | V | | A | | other |
| ZNF160 | ZNF665 | 346 | | 13 | | 10 | | D | | E | | other |
| ZNF160 | ZNF665 | 362 | | 13 | | 26 | | A | | T | | other |
| ZNF160 | ZNF665 | 373 | | 14 | | 9 | | H | | N | | other |
| ZNF160 | ZNF665 | 374 | | 14 | | 10 | | E | | D | | other |
| ZNF160 | ZNF665 | 389 | | 14 | | 25 | | R | | Q | | other |
| ZNF160 | ZNF665 | 417 | | 15 | | 25 | | K | | Q | | other |
| ZNF160 | ZNF665 | 445 | | 16 | | 25 | | Q | | R | | other |
| ZNF160 | ZNF665 | 447 | | 16 | | 27 | | T | | I | | other |
| ZNF160 | ZNF665 | 473 | | 17 | | 25 | | Q | | M | | other |
| ZNF160 | ZNF665 | 479 | | 18 | | 3 | | K | | D | | other |
|  |  |  | |  | |  | |  | |  | |  |
| ZNF468 | ZNF28 | 129 | | 5 | | 17 | | R | | Q | | nt_contact |
| ZNF468 | ZNF28 | 157 | | 6 | | 17 | | R | | C | | nt_contact |
| ZNF468 | ZNF28 | 188 | | 7 | | 20 | | N | | H | | nt_contact |
| ZNF468 | ZNF28 | 47 | | 2 | | 19 | | S | | T | | ntc_adjacent |
| ZNF468 | ZNF28 | 130 | | 5 | | 18 | | L | | Q | | ntc_adjacent |
| ZNF468 | ZNF28 | 156 | | 6 | | 16 | | S | | R | | ntc_adjacent |
| ZNF468 | ZNF28 | 189 | | 7 | | 21 | | L | | M | | ntc_adjacent |
| ZNF468 | ZNF28 | 30 | | 2 | | 2 | | G | | D | | other |
| ZNF468 | ZNF28 | 97 | | 4 | | 13 | | E | | K | | other |
| ZNF468 | ZNF28 | 109 | | 4 | | 25 | | T | | S | | other |
| ZNF468 | ZNF28 | 111 | | 4 | | 27 | | L | | I | | other |
| ZNF468 | ZNF28 | 119 | | 5 | | 7 | | T | | K | | other |
| ZNF468 | ZNF28 | 142 | | 6 | | 2 | | G | | A | | other |
| ZNF468 | ZNF28 | 169 | | 7 | | 1 | | S | | T | | other |
| ZNF468 | ZNF28 | 180 | | 7 | | 12 | | C | | E | | other |
|  |  |  | |  | |  | |  | |  | |  |
| ZNF600 | ZNF611 | 160 | | 6 | | 20 | | Q | | H | | nt_contact |
| ZNF600 | ZNF611 | 163 | | 6 | | 23 | | K | | R | | nt_contact |
| ZNF600 | ZNF611 | 269 | | 10 | | 17 | | H | | L | | nt_contact |
| ZNF600 | ZNF611 | 297 | | 11 | | 17 | | R | | Q | | nt_contact |
| ZNF600 | ZNF611 | 300 | | 11 | | 20 | | S | | Y | | nt_contact |
| ZNF600 | ZNF611 | 356 | | 13 | | 20 | | L | | Y | | nt_contact |
| ZNF600 | ZNF611 | 384 | | 14 | | 20 | | H | | Q | | nt_contact |
| ZNF600 | ZNF611 | 387 | | 14 | | 23 | | R | | L | | nt_contact |
| ZNF600 | ZNF611 | 156 | | 6 | | 16 | | V | | A | | ntc_adjacent |
| ZNF600 | ZNF611 | 158 | | 6 | | 18 | | S | | N | | ntc_adjacent |
| ZNF600 | ZNF611 | 162 | | 6 | | 22 | | A | | V | | ntc_adjacent |
| ZNF600 | ZNF611 | 268 | | 10 | | 16 | | S | | R | | ntc_adjacent |
| ZNF600 | ZNF611 | 324 | | 12 | | 16 | | R | | S | | ntc_adjacent |
| ZNF600 | ZNF611 | 330 | | 12 | | 22 | | I | | V | | ntc_adjacent |
| ZNF600 | ZNF611 | 358 | | 13 | | 22 | | S | | A | | ntc_adjacent |
| ZNF600 | ZNF611 | 42 | | 2 | | 14 | | T | | S | | other |
| ZNF600 | ZNF611 | 169 | | 7 | | 1 | | C | | S | | other |
| ZNF600 | ZNF611 | 171 | | 7 | | 3 | | E | | G | | other |
| ZNF600 | ZNF611 | 321 | | 12 | | 13 | | N | | K | | other |
|  |  |  | |  | |  | |  | |  | |  |
| ZNF799 | ZNF443 | 191 | | 7 | | 23 | | R | | S | | nt_contact |
| ZNF799 | ZNF443 | 269 | | 10 | | 17 | | C | | R | | nt_contact |
| ZNF799 | ZNF443 | 275 | | 10 | | 23 | | Q | | R | | nt_contact |
| ZNF799 | ZNF443 | 106 | | 4 | | 22 | | R | | Q | | ntc_adjacent |
| ZNF799 | ZNF443 | 186 | | 7 | | 18 | | S | | R | | ntc_adjacent |
| ZNF799 | ZNF443 | 296 | | 11 | | 16 | | S | | G | | ntc_adjacent |
| ZNF799 | ZNF443 | 298 | | 11 | | 18 | | F | | Y | | ntc_adjacent |
| ZNF799 | ZNF443 | 299 | | 11 | | 19 | | G | | D | | ntc_adjacent |
| ZNF799 | ZNF443 | 113 | | 5 | | 1 | | T | | S | | other |
| ZNF799 | ZNF443 | 138 | | 5 | | 26 | | V | | I | | other |
| ZNF799 | ZNF443 | 142 | | 6 | | 2 | | R | | G | | other |
| ZNF799 | ZNF443 | 143 | | 6 | | 3 | | D | | N | | other |
| ZNF799 | ZNF443 | 173 | | 7 | | 5 | | L | | P | | other |
| ZNF799 | ZNF443 | 194 | | 7 | | 26 | | T | | I | | other |
| ZNF799 | ZNF443 | 206 | | 8 | | 10 | | I | | V | | other |
|  |  |  | |  | |  | |  | |  | |  |
| ZNF773 | ZNF419 | 45 | | 2 | | 17 | | H | | D | | nt_contact |
| ZNF773 | ZNF419 | 76 | | 3 | | 20 | | D | | H | | nt_contact |
| ZNF773 | ZNF419 | 79 | | 3 | | 23 | | Q | | E | | nt_contact |
| ZNF773 | ZNF419 | 160 | | 6 | | 20 | | S | | N | | nt_contact |
| ZNF773 | ZNF419 | 163 | | 6 | | 23 | | N | | K | | nt_contact |
| ZNF773 | ZNF419 | 44 | | 2 | | 16 | | S | | R | | ntc_adjacent |
| ZNF773 | ZNF419 | 46 | | 2 | | 18 | | K | | M | | ntc_adjacent |
| ZNF773 | ZNF419 | 212 | | 8 | | 16 | | S | | R | | ntc_adjacent |
| ZNF773 | ZNF419 | 242 | | 9 | | 18 | | S | | N | | ntc_adjacent |
| ZNF773 | ZNF419 | 246 | | 9 | | 22 | | V | | F | | ntc_adjacent |
| ZNF773 | ZNF419 | 110 | | 4 | | 26 | | R | | K | | other |
|  |  |  | |  | |  | |  | |  | |  |
| ZNF33B | ZNF33A | 45 | | 2 | | 17 | | E | | D | | nt_contact |
| ZNF33B | ZNF33A | 129 | | 5 | | 17 | | M | | V | | nt_contact |
| ZNF33B | ZNF33A | 157 | | 6 | | 17 | | Q | | E | | nt_contact |
| ZNF33B | ZNF33A | 160 | | 6 | | 20 | | H | | N | | nt_contact |
| ZNF33B | ZNF33A | 188 | | 7 | | 20 | | V | | L | | nt_contact |
| ZNF33B | ZNF33A | 359 | | 13 | | 23 | | L | | F | | nt_contact |
| ZNF33B | ZNF33A | 412 | | 15 | | 20 | | D | | E | | nt_contact |
| ZNF33B | ZNF33A | 100 | | 4 | | 16 | | Y | | C | | ntc_adjacent |
| ZNF33B | ZNF33A | 128 | | 5 | | 16 | | C | | R | | ntc_adjacent |
| ZNF33B | ZNF33A | 130 | | 5 | | 18 | | N | | T | | ntc_adjacent |
| ZNF33B | ZNF33A | 296 | | 11 | | 16 | | C | | Y | | ntc_adjacent |
| ZNF33B | ZNF33A | 173 | | 7 | | 5 | | P | | S | | other |
| ZNF33B | ZNF33A | 199 | | 8 | | 3 | | L | | W | | other |
| ZNF33B | ZNF33A | 315 | | 12 | | 7 | | E | | K | | other |
| ZNF33B | ZNF33A | 447 | | 16 | | 27 | | T | | R | | other |
|  |  |  | |  | |  | |  | |  | |  |
| ZNF585A | ZNF585B | 132 | | 5 | | 20 | | H | | Q | | nt_contact |
| ZNF585A | ZNF585B | 241 | | 9 | | 17 | | Q | | R | | nt_contact |
| ZNF585A | ZNF585B | 247 | | 9 | | 23 | | A | | T | | nt_contact |
| ZNF585A | ZNF585B | 356 | | 13 | | 20 | | H | | N | | nt_contact |
| ZNF585A | ZNF585B | 549 | | 20 | | 17 | | D | | N | | nt_contact |
| ZNF585A | ZNF585B | 72 | | 3 | | 16 | | S | | P | | ntc_adjacent |
| ZNF585A | ZNF585B | 548 | | 20 | | 16 | | T | | S | | ntc_adjacent |
| ZNF585A | ZNF585B | 34 | | 2 | | 6 | | F | | Y | | other |
| ZNF585A | ZNF585B | 66 | | 3 | | 10 | | Q | | E | | other |
|  |  |  | |  | |  | |  | |  | |  |
| ZNF736 | ZNF727 | 48 | | 2 | | 20 | | T | | A | | nt_contact |
| ZNF736 | ZNF727 | 79 | | 3 | | 23 | | N | | K | | nt_contact |
| ZNF736 | ZNF727 | 101 | | 4 | | 17 | | W | | C | | nt_contact |
| ZNF736 | ZNF727 | 135 | | 5 | | 23 | | K | | Q | | nt_contact |
| ZNF736 | ZNF727 | 157 | | 6 | | 17 | | R | | Y | | nt_contact |
| ZNF736 | ZNF727 | 163 | | 6 | | 23 | | N | | S | | nt_contact |
| ZNF736 | ZNF727 | 185 | | 7 | | 17 | | C | | W | | nt_contact |
| ZNF736 | ZNF727 | 213 | | 8 | | 17 | | W | | C | | nt_contact |
| ZNF736 | ZNF727 | 216 | | 8 | | 20 | | H | | N | | nt_contact |
| ZNF736 | ZNF727 | 219 | | 8 | | 23 | | R | | K | | nt_contact |
| ZNF736 | ZNF727 | 50 | | 2 | | 22 | | V | | T | | ntc_adjacent |
| ZNF736 | ZNF727 | 72 | | 3 | | 16 | | K | | R | | ntc_adjacent |
| ZNF736 | ZNF727 | 74 | | 3 | | 18 | | F | | C | | ntc_adjacent |
| ZNF736 | ZNF727 | 102 | | 4 | | 18 | | F | | C | | ntc_adjacent |
| ZNF736 | ZNF727 | 106 | | 4 | | 22 | | A | | T | | ntc_adjacent |
| ZNF736 | ZNF727 | 128 | | 5 | | 16 | | K | | M | | ntc_adjacent |
| ZNF736 | ZNF727 | 130 | | 5 | | 18 | | F | | I | | ntc_adjacent |
| ZNF736 | ZNF727 | 162 | | 6 | | 22 | | F | | I | | ntc_adjacent |
| ZNF736 | ZNF727 | 212 | | 8 | | 16 | | S | | T | | ntc_adjacent |
| ZNF736 | ZNF727 | 214 | | 8 | | 18 | | F | | S | | ntc_adjacent |
| ZNF736 | ZNF727 | 2 | | 1 | | 2 | | V | | A | | other |
| ZNF736 | ZNF727 | 3 | | 1 | | 3 | | E | | D | | other |
| ZNF736 | ZNF727 | 5 | | 1 | | 5 | | C | | S | | other |
| ZNF736 | ZNF727 | 15 | | 1 | | 15 | | F | | C | | other |
| ZNF736 | ZNF727 | 25 | | 1 | | 25 | | K | | N | | other |
| ZNF736 | ZNF727 | 31 | | 2 | | 3 | | E | | K | | other |
| ZNF736 | ZNF727 | 38 | | 2 | | 10 | | G | | E | | other |
| ZNF736 | ZNF727 | 68 | | 3 | | 12 | | G | | H | | other |
| ZNF736 | ZNF727 | 93 | | 4 | | 9 | | E | | K | | other |
| ZNF736 | ZNF727 | 96 | | 4 | | 12 | | N | | H | | other |
| ZNF736 | ZNF727 | 99 | | 4 | | 15 | | Y | | F | | other |
| ZNF736 | ZNF727 | 110 | | 4 | | 26 | | I | | R | | other |
| ZNF736 | ZNF727 | 115 | | 5 | | 3 | | D | | E | | other |
| ZNF736 | ZNF727 | 137 | | 5 | | 25 | | K | | N | | other |
| ZNF736 | ZNF727 | 171 | | 7 | | 3 | | E | | L | | other |
| ZNF736 | ZNF727 | 210 | | 8 | | 14 | | A | | S | | other |
| ZNF736 | ZNF727 | 211 | | 8 | | 15 | | S | | F | | other |
|  |  |  | |  | |  | |  | |  | |  |
| ZNF558 | ZNF557 | 20 | | 1 | | 20 | | N | | S | | nt_contact |
| ZNF558 | ZNF557 | 23 | | 1 | | 23 | | Q | | R | | nt_contact |
| ZNF558 | ZNF557 | 51 | | 2 | | 23 | | I | | V | | nt_contact |
| ZNF558 | ZNF557 | 73 | | 3 | | 17 | | D | | N | | nt_contact |
| ZNF558 | ZNF557 | 76 | | 3 | | 20 | | S | | Y | | nt_contact |
| ZNF558 | ZNF557 | 79 | | 3 | | 23 | | L | | P | | nt_contact |
| ZNF558 | ZNF557 | 104 | | 4 | | 20 | | N | | I | | nt_contact |
| ZNF558 | ZNF557 | 107 | | 4 | | 23 | | S | | R | | nt_contact |
| ZNF558 | ZNF557 | 135 | | 5 | | 23 | | G | | S | | nt_contact |
| ZNF558 | ZNF557 | 157 | | 6 | | 17 | | K | | R | | nt_contact |
| ZNF558 | ZNF557 | 160 | | 6 | | 20 | | Y | | N | | nt_contact |
| ZNF558 | ZNF557 | 185 | | 7 | | 17 | | S | | N | | nt_contact |
| ZNF558 | ZNF557 | 191 | | 7 | | 23 | | V | | I | | nt_contact |
| ZNF558 | ZNF557 | 213 | | 8 | | 17 | | N | | V | | nt_contact |
| ZNF558 | ZNF557 | 216 | | 8 | | 20 | | A | | S | | nt_contact |
| ZNF558 | ZNF557 | 74 | | 3 | | 18 | | P | | S | | ntc_adjacent |
| ZNF558 | ZNF557 | 102 | | 4 | | 18 | | S | | Q | | ntc_adjacent |
| ZNF558 | ZNF557 | 103 | | 4 | | 19 | | C | | S | | ntc_adjacent |
| ZNF558 | ZNF557 | 105 | | 4 | | 21 | | L | | F | | ntc_adjacent |
| ZNF558 | ZNF557 | 106 | | 4 | | 22 | | K | | T | | ntc_adjacent |
| ZNF558 | ZNF557 | 128 | | 5 | | 16 | | S | | G | | ntc_adjacent |
| ZNF558 | ZNF557 | 134 | | 5 | | 22 | | T | | S | | ntc_adjacent |
| ZNF558 | ZNF557 | 158 | | 6 | | 18 | | S | | R | | ntc_adjacent |
| ZNF558 | ZNF557 | 184 | | 7 | | 16 | | S | | T | | ntc_adjacent |
| ZNF558 | ZNF557 | 1 | | 1 | | 1 | | R | | L | | other |
| ZNF558 | ZNF557 | 3 | | 1 | | 3 | | V | | A | | other |
| ZNF558 | ZNF557 | 4 | | 1 | | 4 | | K | | T | | other |
| ZNF558 | ZNF557 | 26 | | 1 | | 26 | | R | | K | | other |
| ZNF558 | ZNF557 | 35 | | 2 | | 7 | | D | | E | | other |
| ZNF558 | ZNF557 | 38 | | 2 | | 10 | | Q | | D | | other |
| ZNF558 | ZNF557 | 42 | | 2 | | 14 | | S | | T | | other |
| ZNF558 | ZNF557 | 65 | | 3 | | 9 | | N | | S | | other |
| ZNF558 | ZNF557 | 66 | | 3 | | 10 | | H | | D | | other |
| ZNF558 | ZNF557 | 70 | | 3 | | 14 | | A | | T | | other |
| ZNF558 | ZNF557 | 91 | | 4 | | 7 | | E | | K | | other |
| ZNF558 | ZNF557 | 97 | | 4 | | 13 | | H | | R | | other |
| ZNF558 | ZNF557 | 98 | | 4 | | 14 | | V | | E | | other |
| ZNF558 | ZNF557 | 111 | | 4 | | 27 | | I | | V | | other |
| ZNF558 | ZNF557 | 116 | | 5 | | 4 | | N | | G | | other |
| ZNF558 | ZNF557 | 118 | | 5 | | 6 | | H | | Y | | other |
| ZNF558 | ZNF557 | 119 | | 5 | | 7 | | E | | V | | other |
| ZNF558 | ZNF557 | 137 | | 5 | | 25 | | N | | Y | | other |
| ZNF558 | ZNF557 | 144 | | 6 | | 4 | | K | | Y | | other |
| ZNF558 | ZNF557 | 165 | | 6 | | 25 | | V | | I | | other |
| ZNF558 | ZNF557 | 175 | | 7 | | 7 | | E | | T | | other |
| ZNF558 | ZNF557 | 193 | | 7 | | 25 | | K | | R | | other |
| ZNF558 | ZNF557 | 197 | | 8 | | 1 | | T | | N | | other |
| ZNF558 | ZNF557 | 201 | | 8 | | 5 | | P | | S | | other |
| ZNF558 | ZNF557 | 221 | | 8 | | 25 | | L | | M | | other |
| ZNF558 | ZNF557 | 227 | | 9 | | 3 | | E | | K | | other |
| ZNF558 | ZNF557 | 234 | | 9 | | 10 | | H | | Y | | other |
| ZNF558 | ZNF557 | 249 | | 9 | | 25 | | K | | T | | other |
| ZNF558 | ZNF557 | 251 | | 9 | | 27 | | I | | M | | other |
|  |  |  | |  | |  | |  | |  | |  |
| ZNF764 | ZNF747 | 73 | | 3 | | 17 | | Q | | R | | nt_contact |
| ZNF764 | ZNF747 | 101 | | 4 | | 17 | | Q | | L | | nt_contact |
| ZNF764 | ZNF747 | 104 | | 4 | | 20 | | A | | G | | nt_contact |
| ZNF764 | ZNF747 | 75 | | 3 | | 19 | | S | | T | | ntc_adjacent |
| ZNF764 | ZNF747 | 103 | | 4 | | 19 | | S | | T | | ntc_adjacent |
| ZNF764 | ZNF747 | 105 | | 4 | | 21 | | V | | M | | ntc_adjacent |
| ZNF764 | ZNF747 | 25 | | 1 | | 25 | | V | | I | | other |
| ZNF764 | ZNF747 | 29 | | 2 | | 1 | | T | | R | | other |
| ZNF764 | ZNF747 | 98 | | 4 | | 14 | | R | | C | | other |
|  |  |  | |  | |  | |  | |  | |  |
| ZNF133 | ZNF343 | 23 | | 1 | | 23 | | I | | R | | nt_contact |
| ZNF133 | ZNF343 | 48 | | 2 | | 20 | | A | | I | | nt_contact |
| ZNF133 | ZNF343 | 73 | | 3 | | 17 | | D | | E | | nt_contact |
| ZNF133 | ZNF343 | 76 | | 3 | | 20 | | N | | S | | nt_contact |
| ZNF133 | ZNF343 | 79 | | 3 | | 23 | | S | | R | | nt_contact |
| ZNF133 | ZNF343 | 101 | | 4 | | 17 | | Q | | D | | nt_contact |
| ZNF133 | ZNF343 | 107 | | 4 | | 23 | | N | | K | | nt_contact |
| ZNF133 | ZNF343 | 132 | | 5 | | 20 | | T | | D | | nt_contact |
| ZNF133 | ZNF343 | 135 | | 5 | | 23 | | S | | K | | nt_contact |
| ZNF133 | ZNF343 | 157 | | 6 | | 17 | | Q | | D | | nt_contact |
| ZNF133 | ZNF343 | 160 | | 6 | | 20 | | N | | T | | nt_contact |
| ZNF133 | ZNF343 | 163 | | 6 | | 23 | | R | | I | | nt_contact |
| ZNF133 | ZNF343 | 185 | | 7 | | 17 | | Q | | R | | nt_contact |
| ZNF133 | ZNF343 | 188 | | 7 | | 20 | | N | | L | | nt_contact |
| ZNF133 | ZNF343 | 191 | | 7 | | 23 | | A | | V | | nt_contact |
| ZNF133 | ZNF343 | 213 | | 8 | | 17 | | H | | Q | | nt_contact |
| ZNF133 | ZNF343 | 216 | | 8 | | 20 | | G | | N | | nt_contact |
| ZNF133 | ZNF343 | 241 | | 9 | | 17 | | N | | D | | nt_contact |
| ZNF133 | ZNF343 | 244 | | 9 | | 20 | | A | | T | | nt_contact |
| ZNF133 | ZNF343 | 247 | | 9 | | 23 | | T | | V | | nt_contact |
| ZNF133 | ZNF343 | 269 | | 10 | | 17 | | Q | | R | | nt_contact |
| ZNF133 | ZNF343 | 272 | | 10 | | 20 | | H | | L | | nt_contact |
| ZNF133 | ZNF343 | 275 | | 10 | | 23 | | L | | V | | nt_contact |
| ZNF133 | ZNF343 | 22 | | 1 | | 22 | | I | | S | | ntc_adjacent |
| ZNF133 | ZNF343 | 44 | | 2 | | 16 | | S | | R | | ntc_adjacent |
| ZNF133 | ZNF343 | 49 | | 2 | | 21 | | V | | L | | ntc_adjacent |
| ZNF133 | ZNF343 | 74 | | 3 | | 18 | | R | | K | | ntc_adjacent |
| ZNF133 | ZNF343 | 77 | | 3 | | 21 | | L | | F | | ntc_adjacent |
| ZNF133 | ZNF343 | 100 | | 4 | | 16 | | R | | C | | ntc_adjacent |
| ZNF133 | ZNF343 | 102 | | 4 | | 18 | | R | | K | | ntc_adjacent |
| ZNF133 | ZNF343 | 103 | | 4 | | 19 | | T | | S | | ntc_adjacent |
| ZNF133 | ZNF343 | 106 | | 4 | | 22 | | V | | R | | ntc_adjacent |
| ZNF133 | ZNF343 | 156 | | 6 | | 16 | | S | | C | | ntc_adjacent |
| ZNF133 | ZNF343 | 158 | | 6 | | 18 | | Q | | K | | ntc_adjacent |
| ZNF133 | ZNF343 | 190 | | 7 | | 22 | | V | | L | | ntc_adjacent |
| ZNF133 | ZNF343 | 214 | | 8 | | 18 | | Q | | K | | ntc_adjacent |
| ZNF133 | ZNF343 | 215 | | 8 | | 19 | | A | | S | | ntc_adjacent |
| ZNF133 | ZNF343 | 240 | | 9 | | 16 | | G | | C | | ntc_adjacent |
| ZNF133 | ZNF343 | 268 | | 10 | | 16 | | L | | S | | ntc_adjacent |
| ZNF133 | ZNF343 | 274 | | 10 | | 22 | | T | | L | | ntc_adjacent |
| ZNF133 | ZNF343 | 2 | | 1 | | 2 | | G | | M | | other |
| ZNF133 | ZNF343 | 7 | | 1 | | 7 | | M | | V | | other |
| ZNF133 | ZNF343 | 30 | | 2 | | 2 | | G | | E | | other |
| ZNF133 | ZNF343 | 35 | | 2 | | 7 | | V | | L | | other |
| ZNF133 | ZNF343 | 41 | | 2 | | 13 | | K | | Q | | other |
| ZNF133 | ZNF343 | 42 | | 2 | | 14 | | G | | S | | other |
| ZNF133 | ZNF343 | 54 | | 2 | | 26 | | R | | W | | other |
| ZNF133 | ZNF343 | 57 | | 3 | | 1 | | L | | S | | other |
| ZNF133 | ZNF343 | 61 | | 3 | | 5 | | T | | P | | other |
| ZNF133 | ZNF343 | 62 | | 3 | | 6 | | I | | Y | | other |
| ZNF133 | ZNF343 | 66 | | 3 | | 10 | | D | | E | | other |
| ZNF133 | ZNF343 | 69 | | 3 | | 13 | | L | | R | | other |
| ZNF133 | ZNF343 | 93 | | 4 | | 9 | | K | | L | | other |
| ZNF133 | ZNF343 | 111 | | 4 | | 27 | | T | | I | | other |
| ZNF133 | ZNF343 | 114 | | 5 | | 2 | | K | | G | | other |
| ZNF133 | ZNF343 | 121 | | 5 | | 9 | | G | | R | | other |
| ZNF133 | ZNF343 | 122 | | 5 | | 10 | | V | | E | | other |
| ZNF133 | ZNF343 | 125 | | 5 | | 13 | | H | | R | | other |
| ZNF133 | ZNF343 | 126 | | 5 | | 14 | | S | | G | | other |
| ZNF133 | ZNF343 | 137 | | 5 | | 25 | | R | | Q | | other |
| ZNF133 | ZNF343 | 141 | | 6 | | 1 | | T | | L | | other |
| ZNF133 | ZNF343 | 142 | | 6 | | 2 | | G | | D | | other |
| ZNF133 | ZNF343 | 149 | | 6 | | 9 | | K | | R | | other |
| ZNF133 | ZNF343 | 150 | | 6 | | 10 | | D | | E | | other |
| ZNF133 | ZNF343 | 165 | | 6 | | 25 | | Q | | E | | other |
| ZNF133 | ZNF343 | 174 | | 7 | | 6 | | M | | Y | | other |
| ZNF133 | ZNF343 | 200 | | 8 | | 4 | | R | | K | | other |
| ZNF133 | ZNF343 | 201 | | 8 | | 5 | | P | | H | | other |
| ZNF133 | ZNF343 | 208 | | 8 | | 12 | | G | | R | | other |
| ZNF133 | ZNF343 | 221 | | 8 | | 25 | | K | | Q | | other |
| ZNF133 | ZNF343 | 223 | | 8 | | 27 | | K | | T | | other |
| ZNF133 | ZNF343 | 226 | | 9 | | 2 | | R | | N | | other |
| ZNF133 | ZNF343 | 231 | | 9 | | 7 | | M | | I | | other |
| ZNF133 | ZNF343 | 234 | | 9 | | 10 | | Q | | E | | other |
| ZNF133 | ZNF343 | 237 | | 9 | | 13 | | L | | R | | other |
| ZNF133 | ZNF343 | 249 | | 9 | | 25 | | K | | E | | other |
| ZNF133 | ZNF343 | 251 | | 9 | | 27 | | A | | T | | other |
| ZNF133 | ZNF343 | 254 | | 10 | | 2 | | E | | G | | other |
| ZNF133 | ZNF343 | 258 | | 10 | | 6 | | C | | Y | | other |
| ZNF133 | ZNF343 | 261 | | 10 | | 9 | | R | | S | | other |
| ZNF133 | ZNF343 | 265 | | 10 | | 13 | | Q | | R | | other |
| ZNF133 | ZNF343 | 278 | | 10 | | 26 | | M | | R | | other |
|  |  |  | |  | |  | |  | |  | |  |
| ZNF17 | ZNF749 | 17 | | 1 | | 17 | | R | | T | | nt_contact |
| ZNF17 | ZNF749 | 23 | | 1 | | 23 | | Q | | G | | nt_contact |
| ZNF17 | ZNF749 | 45 | | 2 | | 17 | | T | | Y | | nt_contact |
| ZNF17 | ZNF749 | 48 | | 2 | | 20 | | H | | K | | nt_contact |
| ZNF17 | ZNF749 | 51 | | 2 | | 23 | | G | | R | | nt_contact |
| ZNF17 | ZNF749 | 73 | | 3 | | 17 | | Y | | D | | nt_contact |
| ZNF17 | ZNF749 | 76 | | 3 | | 20 | | A | | T | | nt_contact |
| ZNF17 | ZNF749 | 101 | | 4 | | 17 | | D | | H | | nt_contact |
| ZNF17 | ZNF749 | 107 | | 4 | | 23 | | I | | M | | nt_contact |
| ZNF17 | ZNF749 | 129 | | 5 | | 17 | | Y | | L | | nt_contact |
| ZNF17 | ZNF749 | 132 | | 5 | | 20 | | T | | N | | nt_contact |
| ZNF17 | ZNF749 | 135 | | 5 | | 23 | | R | | Q | | nt_contact |
| ZNF17 | ZNF749 | 157 | | 6 | | 17 | | D | | R | | nt_contact |
| ZNF17 | ZNF749 | 160 | | 6 | | 20 | | T | | H | | nt_contact |
| ZNF17 | ZNF749 | 163 | | 6 | | 23 | | I | | Q | | nt_contact |
| ZNF17 | ZNF749 | 188 | | 7 | | 20 | | T | | K | | nt_contact |
| ZNF17 | ZNF749 | 191 | | 7 | | 23 | | S | | I | | nt_contact |
| ZNF17 | ZNF749 | 213 | | 8 | | 17 | | C | | Y | | nt_contact |
| ZNF17 | ZNF749 | 219 | | 8 | | 23 | | T | | R | | nt_contact |
| ZNF17 | ZNF749 | 241 | | 9 | | 17 | | H | | D | | nt_contact |
| ZNF17 | ZNF749 | 244 | | 9 | | 20 | | N | | K | | nt_contact |
| ZNF17 | ZNF749 | 247 | | 9 | | 23 | | R | | I | | nt_contact |
| ZNF17 | ZNF749 | 18 | | 1 | | 18 | | K | | Q | | ntc_adjacent |
| ZNF17 | ZNF749 | 19 | | 1 | | 19 | | S | | A | | ntc_adjacent |
| ZNF17 | ZNF749 | 22 | | 1 | | 22 | | L | | V | | ntc_adjacent |
| ZNF17 | ZNF749 | 44 | | 2 | | 16 | | L | | M | | ntc_adjacent |
| ZNF17 | ZNF749 | 46 | | 2 | | 18 | | Q | | N | | ntc_adjacent |
| ZNF17 | ZNF749 | 47 | | 2 | | 19 | | A | | S | | ntc_adjacent |
| ZNF17 | ZNF749 | 50 | | 2 | | 22 | | V | | I | | ntc_adjacent |
| ZNF17 | ZNF749 | 78 | | 3 | | 22 | | I | | G | | ntc_adjacent |
| ZNF17 | ZNF749 | 100 | | 4 | | 16 | | M | | S | | ntc_adjacent |
| ZNF17 | ZNF749 | 102 | | 4 | | 18 | | S | | R | | ntc_adjacent |
| ZNF17 | ZNF749 | 103 | | 4 | | 19 | | C | | S | | ntc_adjacent |
| ZNF17 | ZNF749 | 106 | | 4 | | 22 | | I | | N | | ntc_adjacent |
| ZNF17 | ZNF749 | 128 | | 5 | | 16 | | R | | S | | ntc_adjacent |
| ZNF17 | ZNF749 | 130 | | 5 | | 18 | | R | | K | | ntc_adjacent |
| ZNF17 | ZNF749 | 131 | | 5 | | 19 | | S | | H | | ntc_adjacent |
| ZNF17 | ZNF749 | 133 | | 5 | | 21 | | L | | V | | ntc_adjacent |
| ZNF17 | ZNF749 | 134 | | 5 | | 22 | | I | | V | | ntc_adjacent |
| ZNF17 | ZNF749 | 156 | | 6 | | 16 | | M | | V | | ntc_adjacent |
| ZNF17 | ZNF749 | 158 | | 6 | | 18 | | T | | K | | ntc_adjacent |
| ZNF17 | ZNF749 | 184 | | 7 | | 16 | | V | | L | | ntc_adjacent |
| ZNF17 | ZNF749 | 190 | | 7 | | 22 | | K | | V | | ntc_adjacent |
| ZNF17 | ZNF749 | 215 | | 8 | | 19 | | S | | C | | ntc_adjacent |
| ZNF17 | ZNF749 | 242 | | 9 | | 18 | | N | | S | | ntc_adjacent |
| ZNF17 | ZNF749 | 245 | | 9 | | 21 | | H | | L | | ntc_adjacent |
| ZNF17 | ZNF749 | 2 | | 1 | | 2 | | G | | R | | other |
| ZNF17 | ZNF749 | 3 | | 1 | | 3 | | E | | P | | other |
| ZNF17 | ZNF749 | 4 | | 1 | | 4 | | R | | T | | other |
| ZNF17 | ZNF749 | 9 | | 1 | | 9 | | S | | T | | other |
| ZNF17 | ZNF749 | 10 | | 1 | | 10 | | E | | Q | | other |
| ZNF17 | ZNF749 | 26 | | 1 | | 26 | | R | | K | | other |
| ZNF17 | ZNF749 | 30 | | 2 | | 2 | | R | | G | | other |
| ZNF17 | ZNF749 | 31 | | 2 | | 3 | | P | | E | | other |
| ZNF17 | ZNF749 | 32 | | 2 | | 4 | | R | | Q | | other |
| ZNF17 | ZNF749 | 38 | | 2 | | 10 | | E | | K | | other |
| ZNF17 | ZNF749 | 55 | | 2 | | 27 | | I | | V | | other |
| ZNF17 | ZNF749 | 63 | | 3 | | 7 | | G | | E | | other |
| ZNF17 | ZNF749 | 65 | | 3 | | 9 | | N | | S | | other |
| ZNF17 | ZNF749 | 70 | | 3 | | 14 | | Y | | L | | other |
| ZNF17 | ZNF749 | 82 | | 3 | | 26 | | K | | R | | other |
| ZNF17 | ZNF749 | 93 | | 4 | | 9 | | C | | S | | other |
| ZNF17 | ZNF749 | 94 | | 4 | | 10 | | E | | I | | other |
| ZNF17 | ZNF749 | 115 | | 5 | | 3 | | E | | K | | other |
| ZNF17 | ZNF749 | 119 | | 5 | | 7 | | E | | K | | other |
| ZNF17 | ZNF749 | 126 | | 5 | | 14 | | F | | A | | other |
| ZNF17 | ZNF749 | 137 | | 5 | | 25 | | Q | | L | | other |
| ZNF17 | ZNF749 | 139 | | 5 | | 27 | | V | | I | | other |
| ZNF17 | ZNF749 | 144 | | 6 | | 4 | | K | | R | | other |
| ZNF17 | ZNF749 | 149 | | 6 | | 9 | | S | | T | | other |
| ZNF17 | ZNF749 | 154 | | 6 | | 14 | | F | | A | | other |
| ZNF17 | ZNF749 | 166 | | 6 | | 26 | | R | | K | | other |
| ZNF17 | ZNF749 | 167 | | 6 | | 27 | | V | | I | | other |
| ZNF17 | ZNF749 | 169 | | 7 | | 1 | | S | | T | | other |
| ZNF17 | ZNF749 | 195 | | 7 | | 27 | | V | | I | | other |
| ZNF17 | ZNF749 | 200 | | 8 | | 4 | | R | | K | | other |
| ZNF17 | ZNF749 | 202 | | 8 | | 6 | | F | | Y | | other |
| ZNF17 | ZNF749 | 203 | | 8 | | 7 | | E | | K | | other |
| ZNF17 | ZNF749 | 206 | | 8 | | 10 | | I | | K | | other |
| ZNF17 | ZNF749 | 210 | | 8 | | 14 | | S | | F | | other |
| ZNF17 | ZNF749 | 222 | | 8 | | 26 | | R | | K | | other |
| ZNF17 | ZNF749 | 223 | | 8 | | 27 | | I | | V | | other |
| ZNF17 | ZNF749 | 249 | | 9 | | 25 | | R | | Q | | other |
| ZNF17 | ZNF749 | 251 | | 9 | | 27 | | N | | V | | other |
|  |  |  | |  | |  | |  | |  | |  |
| ZIK1 | ZNF416 | 17 | | 1 | | 17 | | G | | Q | | nt_contact |
| ZIK1 | ZNF416 | 20 | | 1 | | 20 | | S | | N | | nt_contact |
| ZIK1 | ZNF416 | 23 | | 1 | | 23 | | Q | | E | | nt_contact |
| ZIK1 | ZNF416 | 45 | | 2 | | 17 | | Q | | S | | nt_contact |
| ZIK1 | ZNF416 | 48 | | 2 | | 20 | | H | | T | | nt_contact |
| ZIK1 | ZNF416 | 51 | | 2 | | 23 | | D | | R | | nt_contact |
| ZIK1 | ZNF416 | 79 | | 3 | | 23 | | D | | V | | nt_contact |
| ZIK1 | ZNF416 | 101 | | 4 | | 17 | | Q | | L | | nt_contact |
| ZIK1 | ZNF416 | 104 | | 4 | | 20 | | T | | G | | nt_contact |
| ZIK1 | ZNF416 | 107 | | 4 | | 23 | | K | | Q | | nt_contact |
| ZIK1 | ZNF416 | 132 | | 5 | | 20 | | I | | T | | nt_contact |
| ZIK1 | ZNF416 | 135 | | 5 | | 23 | | Q | | K | | nt_contact |
| ZIK1 | ZNF416 | 157 | | 6 | | 17 | | Q | | F | | nt_contact |
| ZIK1 | ZNF416 | 160 | | 6 | | 20 | | T | | K | | nt_contact |
| ZIK1 | ZNF416 | 163 | | 6 | | 23 | | K | | R | | nt_contact |
| ZIK1 | ZNF416 | 188 | | 7 | | 20 | | I | | T | | nt_contact |
| ZIK1 | ZNF416 | 191 | | 7 | | 23 | | Q | | E | | nt_contact |
| ZIK1 | ZNF416 | 216 | | 8 | | 20 | | G | | S | | nt_contact |
| ZIK1 | ZNF416 | 244 | | 9 | | 20 | | S | | G | | nt_contact |
| ZIK1 | ZNF416 | 247 | | 9 | | 23 | | H | | L | | nt_contact |
| ZIK1 | ZNF416 | 16 | | 1 | | 16 | | R | | S | | ntc_adjacent |
| ZIK1 | ZNF416 | 18 | | 1 | | 18 | | K | | S | | ntc_adjacent |
| ZIK1 | ZNF416 | 19 | | 1 | | 19 | | Y | | S | | ntc_adjacent |
| ZIK1 | ZNF416 | 22 | | 1 | | 22 | | V | | I | | ntc_adjacent |
| ZIK1 | ZNF416 | 44 | | 2 | | 16 | | S | | G | | ntc_adjacent |
| ZIK1 | ZNF416 | 46 | | 2 | | 18 | | T | | K | | ntc_adjacent |
| ZIK1 | ZNF416 | 50 | | 2 | | 22 | | N | | V | | ntc_adjacent |
| ZIK1 | ZNF416 | 74 | | 3 | | 18 | | N | | S | | ntc_adjacent |
| ZIK1 | ZNF416 | 75 | | 3 | | 19 | | S | | F | | ntc_adjacent |
| ZIK1 | ZNF416 | 103 | | 4 | | 19 | | A | | C | | ntc_adjacent |
| ZIK1 | ZNF416 | 106 | | 4 | | 22 | | V | | I | | ntc_adjacent |
| ZIK1 | ZNF416 | 130 | | 5 | | 18 | | S | | R | | ntc_adjacent |
| ZIK1 | ZNF416 | 131 | | 5 | | 19 | | A | | T | | ntc_adjacent |
| ZIK1 | ZNF416 | 156 | | 6 | | 16 | | S | | M | | ntc_adjacent |
| ZIK1 | ZNF416 | 159 | | 6 | | 19 | | A | | S | | ntc_adjacent |
| ZIK1 | ZNF416 | 162 | | 6 | | 22 | | I | | V | | ntc_adjacent |
| ZIK1 | ZNF416 | 184 | | 7 | | 16 | | S | | R | | ntc_adjacent |
| ZIK1 | ZNF416 | 187 | | 7 | | 19 | | S | | Y | | ntc_adjacent |
| ZIK1 | ZNF416 | 190 | | 7 | | 22 | | I | | V | | ntc_adjacent |
| ZIK1 | ZNF416 | 212 | | 8 | | 16 | | S | | I | | ntc_adjacent |
| ZIK1 | ZNF416 | 240 | | 9 | | 16 | | S | | T | | ntc_adjacent |
| ZIK1 | ZNF416 | 242 | | 9 | | 18 | | C | | H | | ntc_adjacent |
| ZIK1 | ZNF416 | 3 | | 1 | | 3 | | K | | E | | other |
| ZIK1 | ZNF416 | 4 | | 1 | | 4 | | K | | R | | other |
| ZIK1 | ZNF416 | 5 | | 1 | | 5 | | L | | P | | other |
| ZIK1 | ZNF416 | 9 | | 1 | | 9 | | S | | G | | other |
| ZIK1 | ZNF416 | 14 | | 1 | | 14 | | A | | S | | other |
| ZIK1 | ZNF416 | 25 | | 1 | | 25 | | Q | | C | | other |
| ZIK1 | ZNF416 | 27 | | 1 | | 27 | | V | | I | | other |
| ZIK1 | ZNF416 | 34 | | 2 | | 6 | | W | | Y | | other |
| ZIK1 | ZNF416 | 42 | | 2 | | 14 | | F | | A | | other |
| ZIK1 | ZNF416 | 53 | | 2 | | 25 | | R | | Q | | other |
| ZIK1 | ZNF416 | 55 | | 2 | | 27 | | I | | T | | other |
| ZIK1 | ZNF416 | 60 | | 3 | | 4 | | R | | K | | other |
| ZIK1 | ZNF416 | 65 | | 3 | | 9 | | S | | G | | other |
| ZIK1 | ZNF416 | 82 | | 3 | | 26 | | K | | R | | other |
| ZIK1 | ZNF416 | 86 | | 4 | | 2 | | G | | T | | other |
| ZIK1 | ZNF416 | 93 | | 4 | | 9 | | S | | G | | other |
| ZIK1 | ZNF416 | 110 | | 4 | | 26 | | R | | L | | other |
| ZIK1 | ZNF416 | 111 | | 4 | | 27 | | V | | I | | other |
| ZIK1 | ZNF416 | 113 | | 5 | | 1 | | T | | S | | other |
| ZIK1 | ZNF416 | 118 | | 5 | | 6 | | Y | | F | | other |
| ZIK1 | ZNF416 | 119 | | 5 | | 7 | | K | | E | | other |
| ZIK1 | ZNF416 | 125 | | 5 | | 13 | | N | | K | | other |
| ZIK1 | ZNF416 | 137 | | 5 | | 25 | | R | | H | | other |
| ZIK1 | ZNF416 | 138 | | 5 | | 26 | | R | | K | | other |
| ZIK1 | ZNF416 | 139 | | 5 | | 27 | | I | | V | | other |
| ZIK1 | ZNF416 | 142 | | 6 | | 2 | | G | | A | | other |
| ZIK1 | ZNF416 | 143 | | 6 | | 3 | | A | | E | | other |
| ZIK1 | ZNF416 | 144 | | 6 | | 4 | | K | | R | | other |
| ZIK1 | ZNF416 | 150 | | 6 | | 10 | | Q | | E | | other |
| ZIK1 | ZNF416 | 154 | | 6 | | 14 | | S | | A | | other |
| ZIK1 | ZNF416 | 167 | | 6 | | 27 | | V | | T | | other |
| ZIK1 | ZNF416 | 174 | | 7 | | 6 | | Y | | F | | other |
| ZIK1 | ZNF416 | 175 | | 7 | | 7 | | K | | E | | other |
| ZIK1 | ZNF416 | 182 | | 7 | | 14 | | S | | F | | other |
| ZIK1 | ZNF416 | 193 | | 7 | | 25 | | R | | Q | | other |
| ZIK1 | ZNF416 | 194 | | 7 | | 26 | | R | | K | | other |
| ZIK1 | ZNF416 | 199 | | 8 | | 3 | | A | | L | | other |
| ZIK1 | ZNF416 | 203 | | 8 | | 7 | | E | | D | | other |
| ZIK1 | ZNF416 | 237 | | 9 | | 13 | | N | | K | | other |
| ZIK1 | ZNF416 | 249 | | 9 | | 25 | | Q | | R | | other |
| ZIK1 | ZNF416 | 251 | | 9 | | 27 | | C | | S | | other |
|  |  |  | |  | |  | |  | |  | |  |
| Columns 1 -8 are as defined as in Table 2, with the human name for the inferred ancestral gene listed as gene 1. For each duplicate, there were between 1 and 5 species that contained only one gene corresponding to the duplicate pair (i.e. species that branched before the duplication event). Columns 9 - 12 list the number of these pre-duplication copies that are matched by each of the duplicate copies. Only sites at which all orthologous copies of the new duplicate had the same amino acid were considered. Ignoring infrequent cases in which the a pre-duplication copy matched neither duplicate, an asymmetry score of -1, 0, or +1 was assigned for each position depending on whether fewer, equal, or more pre-duplication copies matched duplicate gene 1 vs. gene 2. Since gene 1 was defined as corresponding to the ancestral sequence, the average of the asymmetry scores can range from 0 to 1. The last table column gives the averaged asymmetry value for each duplicate pair; a value of 0 indicates no asymmetry and a value of 1.0 indicates perfect asymmetry. Note that nearly all of the nucleotide contact sites were asymmetric even for genes with lower overall asymmetry scores. | | | | | | | | | | | | |
