# Supplementary material for: 近世史部会--笹本正治「近世の鋳物師と真継家」,塚田孝「三都の非人と非人集団」 (1984年度歴史学研究会大会報告批判)
Source: HighWire-hosted journal article supplement (doi:10.1101/gr.121749.111), 1984-12-01
Supplement: Table_S11.docx [file Table_S11.docx]

| **Table S11. Pairwise averaged dS values for duplicate KZNF genes** | | | | | |  | | | | | |  |  |  |  |  |
| --- | --- | --- | --- | --- | --- | --- | --- | --- | --- | --- | --- | --- | --- | --- | --- | --- |
|  |  | |  |  | |  | | | | | |  |  |  |  |  |
| duplication depth inferred by presense/absence | human gene 1 | | human gene 2 | mean paralog dS | |  | | | | | |  |  |  |  |  |
| > mmul | ZNF773 | | ZNF419 | 0.05 | |  | | | | | |  |  |  |  |  |
| > mmul | ZNF33B | | ZNF33A | 0.06 | |  | | | | | |  |  |  |  |  |
| > ppyg | ZNF799 | | ZNF443 | 0.07 | |  | | | | | |  |  |  |  |  |
| > ppyg | ZNF600 | | ZNF611 | 0.09 | |  | | | | | |  |  |  |  |  |
| > cjac | ZNF585A | | ZNF585B | 0.10 | |  | | | | | |  |  |  |  |  |
| > ppyg | ZNF468 | | ZNF28 | 0.11 | |  | | | | | |  |  |  |  |  |
| > ppyg | ZNF679 | | ZNF716 | 0.12 | |  | | | | | |  |  |  |  |  |
| > ppyg | ZNF736 | | ZNF727 | 0.12 | |  | | | | | |  |  |  |  |  |
| > ppyg | ZNF431 | | ZNF714 | 0.21 | |  | | | | | |  |  |  |  |  |
| deep | ZNF264 | | ZNF805 | 0.23 | |  | | | | | |  |  |  |  |  |
| > cjac | ZNF100 | | ZNF430 | 0.24 | |  | | | | | |  |  |  |  |  |
| > cjac | ZNF836 | | ZNF841 | 0.29 | |  | | | | | |  |  |  |  |  |
| > cjac | ZNF273 | | ZNF680 | 0.30 | |  | | | | | |  |  |  |  |  |
| deep | ZNF354A | | ZNF354B | 0.31 | |  | | | | | |  |  |  |  |  |
| > cjac | ZNF764 | | ZNF747 | 0.31 | |  | | | | | |  |  |  |  |  |
| > mmul | ZNF558 | | ZNF557 | 0.34 | |  | | | | | |  |  |  |  |  |
| deep | ZNF226 | | ZNF234 | 0.35 | |  | | | | | |  |  |  |  |  |
| > mmul | ZNF675 | | ZNF681 | 0.35 | |  | | | | | |  |  |  |  |  |
| > mmul | ZNF160 | | ZNF665 | 0.40 | |  | | | | | |  |  |  |  |  |
| deep | ZNF383 | | ZNF829 | 0.64 | |  | | | | | |  |  |  |  |  |
| > mmul? | ZNF17 | | ZNF749 | 0.64 | |  | | | | | |  |  |  |  |  |
| > mmul? | ZNF528 | | LLNL759 | 0.66 | |  | | | | | |  |  |  |  |  |
| > cjac | ZIK1 | | ZNF416 | 0.69 | |  | | | | | |  |  |  |  |  |
| deep | ZNF41 | | ZNF484 | 0.71 | |  | | | | | |  |  |  |  |  |
| > cjac | ZNF124 | | ZNF670 | 0.73 | |  | | | | | |  |  |  |  |  |
| > cjac | ZNF136 | | ZNF564 | 0.77 | |  | | | | | |  |  |  |  |  |
| deep | ZNF570 | | ZNF583 | 0.84 | |  | | | | | |  |  |  |  |  |
| deep | ZFP30 | | ZFP82 | 0.84 | |  | | | | | |  |  |  |  |  |
| deep | ZNF81 | | ZNF175 | 0.85 | |  | | | | | |  |  |  |  |  |
| deep | ZNF568 | | ZNF569 | 0.86 | |  | | | | | |  |  |  |  |  |
| deep | ZNF382 | | ZNF567 | 0.87 | |  | | | | | |  |  |  |  |  |
| > mmul? | ZNF133 | | ZNF343 | 0.95 | |  | | | | | |  |  |  |  |  |
| deep | ZFP112 | | ZNF45 | 0.97 | |  | | | | | |  |  |  |  |  |
| deep | ZNF619 | | ZNF621 | 1.12 | |  | | | | | |  |  |  |  |  |
| List of dS estimates for each duplicate gene pair, averaged from the dS value for each available paralog pair. For example, if both genes for a particular duplicate pair were identified in orangutan, chimpanzee, and human, the dS estimate between the two orangutan genes, the two chimpanzee genes, and the two human genes were computed and averaged for the table. Estimates were made with codeml (runmode = -2). | | | | | |  | | | | | |  |  |  |  |  |
|  |  | | | |  | | |  |  | | |  |  |  |  |  |
| **Pairwise dS values among control KZNF genes:** | | | | | | | | | | | | | | | | |
| sequence A | | sequence B | | | | | N | | | S | N*dN | S*dS | dN | dS | dN/dS | approximate divergence date |
| marmoset orthologs: | |  | | | | |  | | |  |  |  |  |  |  |  |
| cjac|Contig100:9151-10692 | | hsap|ENSG00000136866|ZFP37|LLNL505 | | | | | 1219.9 | | | 322.1 | 32.94 | 35.72 | 0.0270 | 0.1109 | 0.2438 | 50 Mya |
| cjac|Contig100:9151-10692 | | mmul|15:23082883-23084424 | | | | | 1199.3 | | | 342.7 | 32.98 | 36.77 | 0.0275 | 0.1073 | 0.2565 | 50 Mya |
| cjac|Contig100:9151-10692 | | ppyg|9:109523136-109521595 | | | | | 1211.9 | | | 330.1 | 29.81 | 36.67 | 0.0246 | 0.1111 | 0.2214 | 50 Mya |
| cjac|Contig100:9151-10692 | | ptro|9:112523235-112521694 | | | | | 1213.7 | | | 328.3 | 29.86 | 36.67 | 0.0246 | 0.1117 | 0.2201 | 50 Mya |
| cjac|Contig10834:33849-35114 | | hsap|ENSG00000063587|ZNF275|LLNL1112 | | | | | 887.1 | | | 237.9 | 20.49 | 58.95 | 0.0231 | 0.2478 | 0.0932 | 50 Mya |
| cjac|Contig10834:33849-35114 | | mmul|X:151406872-151408188 | | | | | 970.2 | | | 295.8 | 46.38 | 85.37 | 0.0478 | 0.2886 | 0.1657 | 50 Mya |
| cjac|Contig10834:33849-35114 | | ppyg|X:153562362-153563678 | | | | | 979.5 | | | 286.5 | 48.39 | 80.54 | 0.0494 | 0.2811 | 0.1758 | 50 Mya |
| cjac|Contig10834:33849-35114 | | ptro|X:152744894-152746210 | | | | | 978.1 | | | 287.9 | 50.57 | 82.02 | 0.0517 | 0.2849 | 0.1816 | 50 Mya |
| cjac|Contig1331:445708-444827 | | hsap|ENSG00000140265|ZSCAN29|LLNL94 | | | | | 658.5 | | | 208.5 | 18.17 | 17.64 | 0.0276 | 0.0846 | 0.3268 | 50 Mya |
| cjac|Contig1331:445708-444827 | | mmul|7:21798072-21797206 | | | | | 661.0 | | | 206.0 | 20.95 | 14.63 | 0.0317 | 0.0710 | 0.4466 | 50 Mya |
| cjac|Contig1331:445708-444827 | | ppyg|15:39820918-39820052 | | | | | 660.2 | | | 206.8 | 17.17 | 14.21 | 0.0260 | 0.0687 | 0.3787 | 50 Mya |
| cjac|Contig1331:445708-444827 | | ptro|15:40486727-40485861 | | | | | 657.6 | | | 209.4 | 17.16 | 15.24 | 0.0261 | 0.0728 | 0.3589 | 50 Mya |
| cjac|Contig1543:236244-237824 | | hsap|ENSG00000178338|ZNF354B|LLNL419 | | | | | 1223.1 | | | 357.9 | 23.61 | 47.96 | 0.0193 | 0.1340 | 0.1439 | 50 Mya |
| cjac|Contig1543:236244-237824 | | mmul|6:175497689-175499269 | | | | | 1255.4 | | | 325.6 | 35.40 | 63.72 | 0.0282 | 0.1957 | 0.1443 | 50 Mya |
| cjac|Contig1543:236244-237824 | | ppyg|5:181472143-181473723 | | | | | 1218.5 | | | 362.5 | 30.71 | 45.64 | 0.0252 | 0.1259 | 0.2004 | 50 Mya |
| cjac|Contig1543:236244-237824 | | ptro|5:181333752-181335332 | | | | | 1222.9 | | | 358.1 | 25.68 | 47.81 | 0.0210 | 0.1335 | 0.1573 | 50 Mya |
| cjac|Contig1543:289843-291309 | | hsap|ENSG00000198939|ZFP2|LLNL536 | | | | | 1142.1 | | | 324.9 | 23.41 | 43.44 | 0.0205 | 0.1337 | 0.1535 | 50 Mya |
| cjac|Contig1543:289843-291309 | | mmul|6:175548282-175549748 | | | | | 1142.4 | | | 324.6 | 29.59 | 44.76 | 0.0259 | 0.1379 | 0.1881 | 50 Mya |
| cjac|Contig1543:289843-291309 | | ppyg|5:181519489-181520901 | | | | | 1095.4 | | | 317.6 | 23.55 | 30.90 | 0.0215 | 0.0973 | 0.2204 | 50 Mya |
| cjac|Contig1543:289843-291309 | | ptro|5:181380586-181382052 | | | | | 1130.1 | | | 336.9 | 25.54 | 35.78 | 0.0226 | 0.1062 | 0.2129 | 50 Mya |
| cjac|Contig1543:322222-323556 | | hsap|ENSG00000178187|ZNF454|LLNL420 | | | | | 998.7 | | | 291.3 | 23.87 | 43.96 | 0.0239 | 0.1509 | 0.1586 | 50 Mya |
| cjac|Contig1543:322222-323556 | | mmul|6:175582001-175583329 | | | | | 985.2 | | | 340.8 | 37.93 | 92.02 | 0.0385 | 0.2700 | 0.1426 | 50 Mya |
| cjac|Contig1543:322222-323556 | | ppyg|5:181553291-181554616 | | | | | 1010.0 | | | 313.0 | 23.03 | 40.00 | 0.0228 | 0.1278 | 0.1784 | 50 Mya |
| cjac|Contig1543:322222-323556 | | ptro|5:181414332-181415657 | | | | | 1015.1 | | | 307.9 | 23.85 | 45.29 | 0.0235 | 0.1471 | 0.1600 | 50 Mya |
| cjac|Contig1543:390092-391528 | | hsap|ENSG00000197083|LLNL1080|LLNL1080 | | | | | 1072.6 | | | 364.4 | 17.16 | 41.21 | 0.0160 | 0.1131 | 0.1413 | 50 Mya |
| cjac|Contig1543:390092-391528 | | mmul|6:175657646-175659082 | | | | | 1095.0 | | | 342.0 | 16.32 | 43.47 | 0.0149 | 0.1271 | 0.1174 | 50 Mya |
| cjac|Contig1543:390092-391528 | | ppyg|5:181626117-181627553 | | | | | 1085.0 | | | 352.0 | 15.08 | 36.40 | 0.0139 | 0.1034 | 0.1346 | 50 Mya |
| cjac|Contig1543:390092-391528 | | ptro|5:181483156-181484592 | | | | | 1078.6 | | | 358.4 | 18.12 | 40.14 | 0.0168 | 0.1120 | 0.1502 | 50 Mya |
| cjac|Contig1543:426292-427707 | | hsap|ENSG00000177932|ZNF354C|LLNL421 | | | | | 1045.3 | | | 370.7 | 26.24 | 48.97 | 0.0251 | 0.1321 | 0.1896 | 50 Mya |
| cjac|Contig1543:426292-427707 | | mmul|6:175697678-175699090 | | | | | 1053.5 | | | 359.5 | 28.87 | 53.57 | 0.0274 | 0.1490 | 0.1841 | 50 Mya |
| cjac|Contig1543:426292-427707 | | ppyg|5:181676021-181677436 | | | | | 1059.6 | | | 356.4 | 22.68 | 53.67 | 0.0214 | 0.1506 | 0.1420 | 50 Mya |
| cjac|Contig1543:426292-427707 | | ptro|5:181530957-181532369 | | | | | 1047.6 | | | 365.4 | 21.89 | 46.48 | 0.0209 | 0.1272 | 0.1645 | 50 Mya |
| cjac|Contig1614:273672-275357 | | hsap|ENSG00000177412|ZFP90|LLNL596 | | | | | 1242.0 | | | 420.0 | 20.49 | 36.62 | 0.0165 | 0.0872 | 0.1889 | 50 Mya |
| cjac|Contig1614:273672-275357 | | mmul|20:66925735-66927420 | | | | | 1248.4 | | | 437.6 | 21.47 | 41.35 | 0.0172 | 0.0945 | 0.1825 | 50 Mya |
| cjac|Contig1614:273672-275357 | | ppyg|16:55959852-55961513 | | | | | 1234.4 | | | 427.6 | 17.41 | 37.76 | 0.0141 | 0.0883 | 0.1595 | 50 Mya |
| cjac|Contig1614:273672-275357 | | ptro|16:68351061-68352722 | | | | | 1244.8 | | | 417.2 | 21.41 | 37.92 | 0.0172 | 0.0909 | 0.1897 | 50 Mya |
| cjac|Contig185:157639-156125 | | hsap|ENSG00000173258|ZNF483|LLNL566 | | | | | 1206.6 | | | 308.4 | 26.67 | 43.85 | 0.0221 | 0.1422 | 0.1554 | 50 Mya |
| cjac|Contig185:157639-156125 | | mmul|15:24640171-24638657 | | | | | 1218.2 | | | 296.8 | 25.58 | 45.53 | 0.0210 | 0.1534 | 0.1370 | 50 Mya |
| cjac|Contig185:157639-156125 | | ppyg|9:107944899-107946413 | | | | | 1206.5 | | | 308.5 | 23.53 | 43.87 | 0.0195 | 0.1422 | 0.1374 | 50 Mya |
| cjac|Contig185:157639-156125 | | ptro|9:110996924-110998438 | | | | | 1204.5 | | | 310.5 | 26.62 | 46.42 | 0.0221 | 0.1495 | 0.1481 | 50 Mya |
| cjac|Contig2195:159370-157550 | | hsap|ENSG00000196437|ZNF569|LLNL233 | | | | | 1382.6 | | | 438.4 | 10.37 | 35.51 | 0.0075 | 0.0810 | 0.0929 | 50 Mya |
| cjac|Contig2195:159370-157550 | | mmul|19:43750114-43748294 | | | | | 1410.9 | | | 410.1 | 13.40 | 43.18 | 0.0095 | 0.1053 | 0.0903 | 50 Mya |
| cjac|Contig2195:159370-157550 | | ppyg|19:38250121-38248301 | | | | | 1391.1 | | | 429.9 | 10.43 | 37.96 | 0.0075 | 0.0883 | 0.0844 | 50 Mya |
| cjac|Contig2195:159370-157550 | | ptro|19:42897338-42895518 | | | | | 1382.2 | | | 438.8 | 10.37 | 35.50 | 0.0075 | 0.0809 | 0.0930 | 50 Mya |
| cjac|Contig2195:62139-63335 | | hsap|ENSG00000188283|ZNF383|LLNL231 | | | | | 911.7 | | | 285.3 | 13.40 | 34.95 | 0.0147 | 0.1225 | 0.1199 | 50 Mya |
| cjac|Contig2195:62139-63335 | | mmul|19:43644149-43645345 | | | | | 930.4 | | | 266.6 | 16.47 | 37.72 | 0.0177 | 0.1415 | 0.1248 | 50 Mya |
| cjac|Contig2195:62139-63335 | | ppyg|19:38068934-38070130 | | | | | 921.7 | | | 275.3 | 13.36 | 35.21 | 0.0145 | 0.1279 | 0.1131 | 50 Mya |
| cjac|Contig2195:62139-63335 | | ptro|19:41828339-41827143 | | | | | 911.9 | | | 285.1 | 13.40 | 33.73 | 0.0147 | 0.1183 | 0.1241 | 50 Mya |
| cjac|Contig2268:27332-29287 | | hsap|ENSG00000096654|ZNF184|LLNL426 | | | | | 1467.7 | | | 488.3 | 16.29 | 64.90 | 0.0111 | 0.1329 | 0.0834 | 50 Mya |
| cjac|Contig2268:27332-29287 | | mmul|4:27214129-27212174 | | | | | 1467.3 | | | 488.7 | 19.37 | 67.54 | 0.0132 | 0.1382 | 0.0958 | 50 Mya |
| cjac|Contig2268:27332-29287 | | ppyg|6:28348798-28346843 | | | | | 1481.0 | | | 475.0 | 15.25 | 65.03 | 0.0103 | 0.1369 | 0.0751 | 50 Mya |
| cjac|Contig2268:27332-29287 | | ptro|6:27958750-27956795 | | | | | 1467.9 | | | 488.1 | 16.29 | 63.65 | 0.0111 | 0.1304 | 0.0850 | 50 Mya |
| cjac|Contig2392:11337-9841 | | hsap|ENSG00000198105|ZNF248|LLNL41 | | | | | 1158.5 | | | 335.5 | 31.86 | 35.29 | 0.0275 | 0.1052 | 0.2612 | 50 Mya |
| cjac|Contig2392:11337-9841 | | mmul|9:37898254-37896758 | | | | | 1128.8 | | | 365.2 | 32.85 | 41.34 | 0.0291 | 0.1132 | 0.2573 | 50 Mya |
| cjac|Contig2392:11337-9841 | | ppyg|10:38171915-38170416 | | | | | 1152.7 | | | 344.3 | 30.55 | 33.29 | 0.0265 | 0.0967 | 0.2736 | 50 Mya |
| cjac|Contig2392:11337-9841 | | ptro|10:38689712-38688213 | | | | | 1157.7 | | | 339.3 | 38.44 | 34.88 | 0.0332 | 0.1028 | 0.3235 | 50 Mya |
| cjac|Contig2658:18545-17226 | | hsap|ENSG00000120784|ZFP30|LLNL136 | | | | | 1067.2 | | | 252.8 | 10.35 | 32.66 | 0.0097 | 0.1292 | 0.0749 | 50 Mya |
| cjac|Contig2658:18545-17226 | | mmul|19:43975674-43974313 | | | | | 1065.2 | | | 254.8 | 10.33 | 34.88 | 0.0097 | 0.1369 | 0.0709 | 50 Mya |
| cjac|Contig2658:18545-17226 | | ppyg|19:38458942-38457620 | | | | | 1074.6 | | | 245.4 | 12.47 | 33.79 | 0.0116 | 0.1377 | 0.0839 | 50 Mya |
| cjac|Contig2658:18545-17226 | | ptro|19:43137775-43136453 | | | | | 1068.4 | | | 251.6 | 11.33 | 33.92 | 0.0106 | 0.1348 | 0.0789 | 50 Mya |
| cjac|Contig2658:275978-274605 | | hsap|ENSG00000142065|ZFP14|LLNL540 | | | | | 1057.0 | | | 308.0 | 8.56 | 32.34 | 0.0081 | 0.1050 | 0.0768 | 50 Mya |
| cjac|Contig2658:275978-274605 | | mmul|19:42807969-42806596 | | | | | 1076.2 | | | 297.8 | 11.62 | 39.49 | 0.0108 | 0.1326 | 0.0816 | 50 Mya |
| cjac|Contig2658:275978-274605 | | ppyg|19_random:3292098-3290725 | | | | | 1061.5 | | | 312.5 | 8.49 | 35.88 | 0.0080 | 0.1148 | 0.0698 | 50 Mya |
| cjac|Contig2658:275978-274605 | | ptro|19:42748877-42750250 | | | | | 1068.8 | | | 305.2 | 12.72 | 33.42 | 0.0119 | 0.1095 | 0.1091 | 50 Mya |
| cjac|Contig2658:308119-306752 | | hsap|ENSG00000181007|ZNF545|LLNL220 | | | | | 1090.2 | | | 277.8 | 14.28 | 36.09 | 0.0131 | 0.1299 | 0.1007 | 50 Mya |
| cjac|Contig2658:308119-306752 | | mmul|19:42860747-42859380 | | | | | 1083.3 | | | 284.7 | 18.42 | 51.13 | 0.0170 | 0.1796 | 0.0946 | 50 Mya |
| cjac|Contig2658:308119-306752 | | ppyg|19:37212915-37211548 | | | | | 1091.7 | | | 276.3 | 17.36 | 36.11 | 0.0159 | 0.1307 | 0.1215 | 50 Mya |
| cjac|Contig2658:308119-306752 | | ptro|19:42692491-42693858 | | | | | 1081.5 | | | 286.5 | 14.28 | 35.96 | 0.0132 | 0.1255 | 0.1051 | 50 Mya |
| cjac|Contig275:287681-289246 | | hsap|ENSG00000141040|ZNF287|LLNL139 | | | | | 1241.0 | | | 325.0 | 10.05 | 34.55 | 0.0081 | 0.1063 | 0.0764 | 50 Mya |
| cjac|Contig275:287681-289246 | | mmul|16:15896273-15897937 | | | | | 1222.5 | | | 343.5 | 11.12 | 35.55 | 0.0091 | 0.1035 | 0.0879 | 50 Mya |
| cjac|Contig275:287681-289246 | | ppyg|17:16894322-16892754 | | | | | 1226.7 | | | 339.3 | 6.99 | 31.93 | 0.0057 | 0.0941 | 0.0611 | 50 Mya |
| cjac|Contig275:287681-289246 | | ptro|17_random:2566075-2564507 | | | | | 1239.0 | | | 327.0 | 8.05 | 35.71 | 0.0065 | 0.1092 | 0.0596 | 50 Mya |
| cjac|Contig2928:119007-117961 | | hsap|ENSG00000186812|ZNF397|LLNL151 | | | | | 714.4 | | | 173.6 | 5.00 | 15.85 | 0.0070 | 0.0913 | 0.0771 | 50 Mya |
| cjac|Contig2928:119007-117961 | | ptro|18:31216875-31217924 | | | | | 825.6 | | | 221.4 | 10.07 | 16.56 | 0.0122 | 0.0748 | 0.1634 | 50 Mya |
| cjac|Contig3842:239591-238116 | | hsap|ENSG00000198440|ZNF583|LLNL294 | | | | | 1123.9 | | | 352.1 | 20.68 | 44.61 | 0.0184 | 0.1267 | 0.1455 | 50 Mya |
| cjac|Contig3842:239591-238116 | | mmul|19:62412162-62413637 | | | | | 1108.5 | | | 367.5 | 25.05 | 44.36 | 0.0226 | 0.1207 | 0.1869 | 50 Mya |
| cjac|Contig3842:239591-238116 | | ppyg|19:58419197-58420672 | | | | | 1110.3 | | | 365.7 | 22.87 | 43.01 | 0.0206 | 0.1176 | 0.1755 | 50 Mya |
| cjac|Contig3842:239591-238116 | | ptro|19:62268797-62270272 | | | | | 1125.5 | | | 350.5 | 21.72 | 44.58 | 0.0193 | 0.1272 | 0.1520 | 50 Mya |
| cjac|Contig3842:98149-96440 | | hsap|ENSG00000196867|ZFP28|LLNL297 | | | | | 1269.8 | | | 440.2 | 25.40 | 57.14 | 0.0200 | 0.1298 | 0.1542 | 50 Mya |
| cjac|Contig3842:98149-96440 | | mmul|19:62516627-62518336 | | | | | 1268.2 | | | 441.8 | 26.63 | 64.33 | 0.0210 | 0.1456 | 0.1439 | 50 Mya |
| cjac|Contig3842:98149-96440 | | ppyg|19:58561757-58563466 | | | | | 1256.9 | | | 453.1 | 24.51 | 60.81 | 0.0195 | 0.1342 | 0.1452 | 50 Mya |
| cjac|Contig3842:98149-96440 | | ptro|19:62401349-62403058 | | | | | 1277.4 | | | 432.6 | 25.55 | 55.59 | 0.0200 | 0.1285 | 0.1559 | 50 Mya |
| cjac|Contig3877:18485-19486 | | hsap|ENSG00000163067|ZNF2|LLNL345 | | | | | 741.7 | | | 260.3 | 25.66 | 45.63 | 0.0346 | 0.1753 | 0.1971 | 50 Mya |
| cjac|Contig3877:18485-19486 | | mmul|13:96277517-96278512 | | | | | 738.7 | | | 257.3 | 23.49 | 60.80 | 0.0318 | 0.2363 | 0.1347 | 50 Mya |
| cjac|Contig3877:18485-19486 | | ppyg|2a:3432510-3433511 | | | | | 745.0 | | | 257.0 | 18.33 | 40.58 | 0.0246 | 0.1579 | 0.1557 | 50 Mya |
| cjac|Contig3877:18485-19486 | | ptro|2a:96095783-96096784 | | | | | 743.7 | | | 258.3 | 23.50 | 38.02 | 0.0316 | 0.1472 | 0.2148 | 50 Mya |
| cjac|Contig39:1407114-1406362 | | hsap|ENSG00000167528|ZNF641|LLNL69 | | | | | 550.1 | | | 202.9 | 8.97 | 18.24 | 0.0163 | 0.0899 | 0.1816 | 50 Mya |
| cjac|Contig39:1407114-1406362 | | mmul|11:45455577-45454822 | | | | | 543.2 | | | 209.8 | 9.02 | 20.52 | 0.0166 | 0.0978 | 0.1696 | 50 Mya |
| cjac|Contig39:1407114-1406362 | | ppyg|12:47998417-47997665 | | | | | 532.7 | | | 220.3 | 8.04 | 17.87 | 0.0151 | 0.0811 | 0.1857 | 50 Mya |
| cjac|Contig39:1407114-1406362 | | ptro|12:41394549-41395301 | | | | | 544.6 | | | 208.4 | 6.97 | 16.92 | 0.0128 | 0.0812 | 0.1578 | 50 Mya |
| cjac|Contig3904:166056-167873 | | hsap|ENSG00000147789|ZNF7|LLNL491 | | | | | 1002.4 | | | 431.6 | 10.12 | 41.52 | 0.0101 | 0.0962 | 0.1054 | 50 Mya |
| cjac|Contig3904:166056-167873 | | mmul|8:147490905-147492719 | | | | | 1314.8 | | | 500.2 | 29.98 | 57.22 | 0.0228 | 0.1144 | 0.1993 | 50 Mya |
| cjac|Contig3904:166056-167873 | | ppyg|8:153222079-153223893 | | | | | 1300.3 | | | 514.7 | 34.20 | 51.06 | 0.0263 | 0.0992 | 0.2655 | 50 Mya |
| cjac|Contig3904:166056-167873 | | ptro|8:144853468-144855282 | | | | | 1289.3 | | | 525.7 | 31.33 | 59.46 | 0.0243 | 0.1131 | 0.2149 | 50 Mya |
| cjac|Contig3904:197354-196035 | | hsap|ENSG00000196150|ZNF250|LLNL492 | | | | | 931.9 | | | 388.1 | 11.18 | 46.53 | 0.0120 | 0.1199 | 0.1005 | 50 Mya |
| cjac|Contig3904:197354-196035 | | mmul|8:147533183-147531864 | | | | | 945.6 | | | 374.4 | 12.20 | 47.62 | 0.0129 | 0.1272 | 0.1017 | 50 Mya |
| cjac|Contig3904:197354-196035 | | ppyg|8:153277260-153275941 | | | | | 937.3 | | | 382.7 | 12.28 | 46.46 | 0.0131 | 0.1214 | 0.1076 | 50 Mya |
| cjac|Contig3904:197354-196035 | | ptro|8:144903957-144902638 | | | | | 929.8 | | | 390.2 | 12.27 | 47.84 | 0.0132 | 0.1226 | 0.1076 | 50 Mya |
| cjac|Contig398:544603-542543 | | hsap|ENSG00000197362|ZNF786|LLNL464 | | | | | 1566.1 | | | 473.9 | 75.49 | 121.46 | 0.0482 | 0.2563 | 0.1881 | 50 Mya |
| cjac|Contig398:544603-542543 | | mmul|3:186394391-186392346 | | | | | 1575.0 | | | 462.0 | 107.57 | 135.69 | 0.0683 | 0.2937 | 0.2327 | 50 Mya |
| cjac|Contig398:544603-542543 | | ppyg|7:146820840-146818792 | | | | | 1564.2 | | | 475.8 | 75.39 | 135.37 | 0.0482 | 0.2845 | 0.1696 | 50 Mya |
| cjac|Contig398:544603-542543 | | ptro|7:149715472-149713424 | | | | | 1571.3 | | | 468.7 | 76.37 | 127.72 | 0.0486 | 0.2725 | 0.1783 | 50 Mya |
| cjac|Contig398:720278-721123 | | hsap|ENSG00000170260|ZNF212|LLNL467 | | | | | 602.0 | | | 244.0 | 13.48 | 27.50 | 0.0224 | 0.1127 | 0.1988 | 50 Mya |
| cjac|Contig398:720278-721123 | | mmul|3:186569458-186570312 | | | | | 613.4 | | | 232.6 | 13.43 | 27.63 | 0.0219 | 0.1188 | 0.1843 | 50 Mya |
| cjac|Contig398:720278-721123 | | ppyg|7:147029080-147029934 | | | | | 603.8 | | | 242.2 | 15.64 | 26.30 | 0.0259 | 0.1086 | 0.2385 | 50 Mya |
| cjac|Contig398:720278-721123 | | ptro|7:149906084-149906938 | | | | | 599.7 | | | 246.3 | 14.63 | 30.27 | 0.0244 | 0.1229 | 0.1984 | 50 Mya |
| cjac|Contig4202:19153-17363 | | hsap|ENSG00000196458|ZNF605|LLNL77 | | | | | 1343.5 | | | 438.5 | 39.63 | 86.12 | 0.0295 | 0.1964 | 0.1502 | 50 Mya |
| cjac|Contig4202:19153-17363 | | mmul|11:134209743-134207956 | | | | | 1357.8 | | | 427.2 | 37.61 | 70.06 | 0.0277 | 0.1640 | 0.1688 | 50 Mya |
| cjac|Contig4202:19153-17363 | | ppyg|12:136032978-136031185 | | | | | 1347.7 | | | 443.3 | 37.60 | 74.92 | 0.0279 | 0.1690 | 0.1650 | 50 Mya |
| cjac|Contig4202:19153-17363 | | ptro|12:135064368-135062575 | | | | | 1344.7 | | | 446.3 | 31.33 | 75.02 | 0.0233 | 0.1681 | 0.1386 | 50 Mya |
| cjac|Contig4338:189582-187093 | | hsap|ENSG00000062370|ZNF228|LLNL256 | | | | | 1896.5 | | | 587.5 | 83.45 | 85.83 | 0.0440 | 0.1461 | 0.3014 | 50 Mya |
| cjac|Contig4338:189582-187093 | | mmul|19:50748033-50745532 | | | | | 1873.1 | | | 610.9 | 85.79 | 94.57 | 0.0458 | 0.1548 | 0.2960 | 50 Mya |
| cjac|Contig4338:189582-187093 | | ppyg|19:45554670-45552169 | | | | | 1899.9 | | | 584.1 | 82.65 | 85.16 | 0.0435 | 0.1458 | 0.2985 | 50 Mya |
| cjac|Contig4338:189582-187093 | | ptro|19:49925325-49922824 | | | | | 1909.0 | | | 575.0 | 81.32 | 88.55 | 0.0426 | 0.1540 | 0.2765 | 50 Mya |
| cjac|Contig582:142238-143668 | | hsap|ENSG00000161298|ZNF382|LLNL541 | | | | | 1025.2 | | | 396.8 | 22.55 | 23.89 | 0.0220 | 0.0602 | 0.3645 | 50 Mya |
| cjac|Contig582:142238-143668 | | mmul|19:43097851-43099281 | | | | | 1074.8 | | | 356.2 | 23.43 | 31.17 | 0.0218 | 0.0875 | 0.2490 | 50 Mya |
| cjac|Contig582:142238-143668 | | ppyg|19:37458606-37460036 | | | | | 1040.8 | | | 390.2 | 20.40 | 23.88 | 0.0196 | 0.0612 | 0.3205 | 50 Mya |
| cjac|Contig582:142238-143668 | | ptro|19:42460728-42459298 | | | | | 1041.7 | | | 389.3 | 22.71 | 24.88 | 0.0218 | 0.0639 | 0.3406 | 50 Mya |
| cjac|Contig5841:74144-75085 | | hsap|ENSG00000173275|ZNF449|LLNL537 | | | | | 690.4 | | | 191.6 | 5.04 | 13.93 | 0.0073 | 0.0727 | 0.1004 | 50 Mya |
| cjac|Contig5841:74144-75085 | | mmul|X:133607507-133608388 | | | | | 684.7 | | | 197.3 | 6.03 | 20.64 | 0.0088 | 0.1046 | 0.0845 | 50 Mya |
| cjac|Contig5841:74144-75085 | | ppyg|X:134857435-134858376 | | | | | 741.2 | | | 200.8 | 8.08 | 16.24 | 0.0109 | 0.0809 | 0.1350 | 50 Mya |
| cjac|Contig5841:74144-75085 | | ptro|X:134840373-134841254 | | | | | 695.1 | | | 186.9 | 6.05 | 13.98 | 0.0087 | 0.0748 | 0.1166 | 50 Mya |
| cjac|Contig60:136217-135327 | | hsap|ENSG00000106261|ZKSCAN1|LLNL562 | | | | | 624.1 | | | 266.9 | 9.11 | 23.97 | 0.0146 | 0.0898 | 0.1622 | 50 Mya |
| cjac|Contig60:136217-135327 | | mmul|3:47309763-47310653 | | | | | 667.8 | | | 223.2 | 7.08 | 29.91 | 0.0106 | 0.1340 | 0.0790 | 50 Mya |
| cjac|Contig60:136217-135327 | | ppyg|7:9013870-9014760 | | | | | 638.7 | | | 252.3 | 3.00 | 25.13 | 0.0047 | 0.0996 | 0.0473 | 50 Mya |
| cjac|Contig60:136217-135327 | | ptro|7:99885027-99885917 | | | | | 626.8 | | | 264.2 | 8.09 | 22.77 | 0.0129 | 0.0862 | 0.1494 | 50 Mya |
| cjac|Contig60:539346-538516 | | hsap|ENSG00000197037|ZNF498|LLNL672 | | | | | 650.5 | | | 171.5 | 12.23 | 39.41 | 0.0188 | 0.2298 | 0.0817 | 50 Mya |
| cjac|Contig60:539346-538516 | | mmul|3:46828832-46829662 | | | | | 660.5 | | | 170.5 | 13.21 | 39.62 | 0.0200 | 0.2324 | 0.0861 | 50 Mya |
| cjac|Contig60:539346-538516 | | ppyg|7:8539554-8540384 | | | | | 660.0 | | | 171.0 | 13.20 | 39.59 | 0.0200 | 0.2315 | 0.0866 | 50 Mya |
| cjac|Contig60:539346-538516 | | ptro|7:99404571-99405401 | | | | | 660.3 | | | 170.7 | 14.26 | 36.68 | 0.0216 | 0.2149 | 0.1005 | 50 Mya |
| cjac|Contig60:597089-595749 | | hsap|ENSG00000197343|ZNF655|LLNL457 | | | | | 1019.4 | | | 321.6 | 23.24 | 27.37 | 0.0228 | 0.0851 | 0.2683 | 50 Mya |
| cjac|Contig60:597089-595749 | | mmul|3:46776582-46777922 | | | | | 1012.8 | | | 328.2 | 26.33 | 27.47 | 0.0260 | 0.0837 | 0.3111 | 50 Mya |
| cjac|Contig60:597089-595749 | | ppyg|7:8477198-8478538 | | | | | 1026.3 | | | 314.7 | 26.38 | 24.92 | 0.0257 | 0.0792 | 0.3247 | 50 Mya |
| cjac|Contig60:597089-595749 | | ptro|7:99346785-99348125 | | | | | 1027.6 | | | 313.4 | 23.33 | 29.90 | 0.0227 | 0.0954 | 0.2374 | 50 Mya |
| cjac|Contig60:92589-93653 | | hsap|ENSG00000166526|ZNF3|LLNL460 | | | | | 766.3 | | | 292.7 | 7.13 | 37.79 | 0.0093 | 0.1291 | 0.0720 | 50 Mya |
| cjac|Contig60:92589-93653 | | mmul|3:47351027-47349960 | | | | | 772.7 | | | 292.3 | 7.11 | 36.63 | 0.0092 | 0.1253 | 0.0736 | 50 Mya |
| cjac|Contig60:92589-93653 | | ppyg|7:9057879-9056812 | | | | | 786.6 | | | 278.4 | 12.27 | 39.06 | 0.0156 | 0.1403 | 0.1109 | 50 Mya |
| cjac|Contig60:92589-93653 | | ptro|7:99924886-99923819 | | | | | 778.7 | | | 286.3 | 9.19 | 40.48 | 0.0118 | 0.1414 | 0.0833 | 50 Mya |
| cjac|Contig6036:176677-175358 | | hsap|ENSG00000018869|ZNF582|LLNL293 | | | | | 990.2 | | | 329.8 | 36.44 | 65.63 | 0.0368 | 0.1990 | 0.1851 | 50 Mya |
| cjac|Contig6036:176677-175358 | | mmul|19:62371830-62370511 | | | | | 1002.1 | | | 317.9 | 38.38 | 68.48 | 0.0383 | 0.2154 | 0.1777 | 50 Mya |
| cjac|Contig6036:176677-175358 | | ppyg|19:58376972-58375653 | | | | | 1008.7 | | | 311.3 | 38.03 | 68.05 | 0.0377 | 0.2186 | 0.1726 | 50 Mya |
| cjac|Contig6036:176677-175358 | | ptro|19:62230724-62229405 | | | | | 996.4 | | | 323.6 | 36.47 | 65.50 | 0.0366 | 0.2024 | 0.1808 | 50 Mya |
| cjac|Contig6322:78394-76604 | | hsap|ENSG00000167377|ZNF23|LLNL123 | | | | | 1339.2 | | | 451.8 | 29.60 | 48.66 | 0.0221 | 0.1077 | 0.2050 | 50 Mya |
| cjac|Contig6322:78394-76604 | | mmul|20:71209917-71211707 | | | | | 1341.4 | | | 449.6 | 32.06 | 46.89 | 0.0239 | 0.1043 | 0.2295 | 50 Mya |
| cjac|Contig6322:78394-76604 | | ppyg|16:60386718-60388508 | | | | | 1349.3 | | | 441.7 | 28.47 | 51.10 | 0.0211 | 0.1157 | 0.1827 | 50 Mya |
| cjac|Contig6322:78394-76604 | | ptro|16:71305419-71303629 | | | | | 1341.4 | | | 449.6 | 31.66 | 47.39 | 0.0236 | 0.1054 | 0.2238 | 50 Mya |
| cjac|Contig646:445483-446601 | | hsap|ENSG00000184517|ZFP1|LLNL127 | | | | | 814.8 | | | 265.2 | 10.10 | 43.92 | 0.0124 | 0.1656 | 0.0748 | 50 Mya |
| cjac|Contig646:445483-446601 | | mmul|20:73278173-73279285 | | | | | 858.2 | | | 254.8 | 12.27 | 39.70 | 0.0143 | 0.1558 | 0.0919 | 50 Mya |
| cjac|Contig646:445483-446601 | | ppyg|16:62490398-62491510 | | | | | 831.9 | | | 281.1 | 13.14 | 42.31 | 0.0158 | 0.1505 | 0.1048 | 50 Mya |
| cjac|Contig646:445483-446601 | | ptro|16:75114718-75115800 | | | | | 823.8 | | | 259.2 | 10.13 | 45.26 | 0.0123 | 0.1746 | 0.0702 | 50 Mya |
| cjac|Contig7362:28874-30055 | | hsap|ENSG00000156853|ZNF689|LLNL116 | | | | | 900.0 | | | 282.0 | 3.06 | 65.34 | 0.0034 | 0.2317 | 0.0145 | 50 Mya |
| cjac|Contig7362:28874-30055 | | mmul|20:28674124-28672943 | | | | | 903.8 | | | 278.2 | 4.07 | 62.98 | 0.0045 | 0.2264 | 0.0197 | 50 Mya |
| cjac|Contig7362:28874-30055 | | ppyg|16:29121419-29120238 | | | | | 904.9 | | | 277.1 | 4.07 | 58.39 | 0.0045 | 0.2107 | 0.0212 | 50 Mya |
| cjac|Contig7362:28874-30055 | | ptro|16:30989891-30988710 | | | | | 900.6 | | | 281.4 | 3.06 | 65.26 | 0.0034 | 0.2319 | 0.0145 | 50 Mya |
| cjac|Contig7376:42148-43887 | | hsap|ENSG00000167384|ZNF180|LLNL258 | | | | | 1393.6 | | | 346.4 | 45.29 | 38.14 | 0.0325 | 0.1101 | 0.2950 | 50 Mya |
| cjac|Contig7376:42148-43887 | | mmul|19:50869759-50868017 | | | | | 1370.3 | | | 369.7 | 42.34 | 42.55 | 0.0309 | 0.1151 | 0.2683 | 50 Mya |
| cjac|Contig7376:42148-43887 | | ppyg|19:45704750-45703008 | | | | | 1373.3 | | | 366.7 | 45.46 | 41.73 | 0.0331 | 0.1138 | 0.2913 | 50 Mya |
| cjac|Contig7376:42148-43887 | | ptro|19:50071251-50069509 | | | | | 1384.7 | | | 355.3 | 45.42 | 35.67 | 0.0328 | 0.1004 | 0.3264 | 50 Mya |
| cjac|Contig7430:47789-48958 | | hsap|ENSG00000006194|ZNF263|LLNL102 | | | | | 829.7 | | | 334.3 | 18.83 | 45.80 | 0.0227 | 0.1370 | 0.1659 | 50 Mya |
| cjac|Contig7430:47789-48958 | | mmul|20:3427874-3429043 | | | | | 837.5 | | | 329.5 | 13.15 | 46.29 | 0.0157 | 0.1405 | 0.1120 | 50 Mya |
| cjac|Contig7430:47789-48958 | | ppyg|16:3400448-3401695 | | | | | 826.5 | | | 337.5 | 16.45 | 41.14 | 0.0199 | 0.1219 | 0.1636 | 50 Mya |
| cjac|Contig7430:47789-48958 | | ptro|16:3407167-3408414 | | | | | 830.0 | | | 334.0 | 16.52 | 43.65 | 0.0199 | 0.1307 | 0.1521 | 50 Mya |
| cjac|Contig7537:25827-27077 | | hsap|ENSG00000125945|ZNF436|LLNL6 | | | | | 878.3 | | | 372.7 | 7.11 | 33.47 | 0.0081 | 0.0898 | 0.0906 | 50 Mya |
| cjac|Contig7537:25827-27077 | | mmul|1:25965367-25964120 | | | | | 912.2 | | | 335.8 | 6.11 | 31.26 | 0.0067 | 0.0931 | 0.0716 | 50 Mya |
| cjac|Contig7537:25827-27077 | | ppyg|1:207059439-207060689 | | | | | 878.1 | | | 372.9 | 6.15 | 37.14 | 0.0070 | 0.0996 | 0.0699 | 50 Mya |
| cjac|Contig7537:25827-27077 | | ptro|1:23553804-23552554 | | | | | 864.3 | | | 386.7 | 6.14 | 37.12 | 0.0071 | 0.0960 | 0.0740 | 50 Mya |
| cjac|Contig8171:59788-60711 | | hsap|ENSG00000155592|ZKSCAN2|LLNL593 | | | | | 675.0 | | | 246.0 | 3.98 | 17.61 | 0.0059 | 0.0716 | 0.0827 | 50 Mya |
| cjac|Contig8171:59788-60711 | | mmul|20:23717068-23716145 | | | | | 669.8 | | | 254.2 | 13.13 | 19.80 | 0.0196 | 0.0779 | 0.2519 | 50 Mya |
| cjac|Contig8171:59788-60711 | | ppyg|16:24415998-24415075 | | | | | 675.8 | | | 248.2 | 3.99 | 18.74 | 0.0059 | 0.0755 | 0.0783 | 50 Mya |
| cjac|Contig8171:59788-60711 | | ptro|16:25546166-25545243 | | | | | 686.1 | | | 237.9 | 3.98 | 20.03 | 0.0058 | 0.0842 | 0.0692 | 50 Mya |
| cjac|Contig834:548122-546317 | | hsap|ENSG00000124459|ZNF45|LLNL243 | | | | | 1308.9 | | | 488.1 | 23.30 | 41.88 | 0.0178 | 0.0858 | 0.2073 | 50 Mya |
| cjac|Contig834:548122-546317 | | mmul|19:50363998-50362184 | | | | | 1280.4 | | | 525.6 | 24.46 | 51.19 | 0.0191 | 0.0974 | 0.1956 | 50 Mya |
| cjac|Contig834:548122-546317 | | ppyg|19:45158948-45157140 | | | | | 1290.1 | | | 512.9 | 27.74 | 44.93 | 0.0215 | 0.0876 | 0.2453 | 50 Mya |
| cjac|Contig834:548122-546317 | | ptro|19:49486483-49484675 | | | | | 1324.2 | | | 475.8 | 24.37 | 40.78 | 0.0184 | 0.0857 | 0.2144 | 50 Mya |
| cjac|Contig9027:52800-53798 | | hsap|ENSG00000166261|ZNF202|LLNL482 | | | | | 732.7 | | | 263.3 | 11.06 | 41.05 | 0.0151 | 0.1559 | 0.0968 | 50 Mya |
| cjac|Contig9027:52800-53798 | | mmul|14:122089998-122089003 | | | | | 729.0 | | | 267.0 | 16.18 | 38.42 | 0.0222 | 0.1439 | 0.1543 | 50 Mya |
| cjac|Contig9027:52800-53798 | | ppyg|11:120600551-120599556 | | | | | 727.0 | | | 269.0 | 11.05 | 40.94 | 0.0152 | 0.1522 | 0.0999 | 50 Mya |
| cjac|Contig9027:52800-53798 | | ptro|11:122692080-122691085 | | | | | 725.3 | | | 270.7 | 13.13 | 43.39 | 0.0181 | 0.1603 | 0.1126 | 50 Mya |
|  | | mean | | | | | 1045.2 | | | 335.8 | 22.42 | 44.54 | 0.0203 | 0.1329 | 0.1608 |  |
|  | | sdev | | | | | 285.1 | | | 92.1 | 17.08 | 21.09 | 0.0109 | 0.0505 | 0.0792 |  |
|  | |  | | | | |  | | |  |  |  |  |  |  |  |
| macaque orthologs: | |  | | | | |  | | |  |  |  |  |  |  |  |
| mmul|1:25965367-25964120 | | hsap|ENSG00000125945|ZNF436|LLNL6 | | | | | 897.7 | | | 350.3 | 0.99 | 27.53 | 0.0011 | 0.0786 | 0.0143 | 31 Mya |
| mmul|1:25965367-25964120 | | ppyg|1:207059439-207060689 | | | | | 897.5 | | | 350.5 | 0.09 | 30.95 | 0.0001 | 0.0883 | 0.0010 | 31 Mya |
| mmul|1:25965367-25964120 | | ptro|1:23553804-23552554 | | | | | 873.4 | | | 374.6 | 0.09 | 30.90 | 0.0001 | 0.0825 | 0.0010 | 31 Mya |
| mmul|11:134209743-134207956 | | hsap|ENSG00000196458|ZNF605|LLNL77 | | | | | 1335.1 | | | 443.9 | 24.03 | 30.81 | 0.0180 | 0.0694 | 0.2601 | 31 Mya |
| mmul|11:134209743-134207956 | | ppyg|12:136032978-136031185 | | | | | 1330.8 | | | 457.2 | 21.03 | 21.58 | 0.0158 | 0.0472 | 0.3354 | 31 Mya |
| mmul|11:134209743-134207956 | | ptro|12:135064368-135062575 | | | | | 1314.1 | | | 473.9 | 16.03 | 23.79 | 0.0122 | 0.0502 | 0.2424 | 31 Mya |
| mmul|11:45455577-45454822 | | hsap|ENSG00000167528|ZNF641|LLNL69 | | | | | 558.4 | | | 194.6 | 5.97 | 15.86 | 0.0107 | 0.0815 | 0.1312 | 31 Mya |
| mmul|11:45455577-45454822 | | ppyg|12:47998417-47997665 | | | | | 533.9 | | | 219.1 | 6.03 | 15.40 | 0.0113 | 0.0703 | 0.1605 | 31 Mya |
| mmul|11:45455577-45454822 | | ptro|12:41394549-41395301 | | | | | 552.7 | | | 200.3 | 3.98 | 14.54 | 0.0072 | 0.0726 | 0.0990 | 31 Mya |
| mmul|13:96277517-96278512 | | hsap|ENSG00000163067|ZNF2|LLNL345 | | | | | 713.7 | | | 282.3 | 16.34 | 43.81 | 0.0229 | 0.1552 | 0.1472 | 31 Mya |
| mmul|13:96277517-96278512 | | ppyg|2a:3432510-3433511 | | | | | 704.3 | | | 291.7 | 11.20 | 40.02 | 0.0159 | 0.1372 | 0.1156 | 31 Mya |
| mmul|13:96277517-96278512 | | ptro|2a:96095783-96096784 | | | | | 712.1 | | | 283.9 | 14.24 | 37.50 | 0.0200 | 0.1321 | 0.1514 | 31 Mya |
| mmul|14:122089998-122089003 | | hsap|ENSG00000166261|ZNF202|LLNL482 | | | | | 739.3 | | | 256.7 | 9.02 | 32.42 | 0.0122 | 0.1263 | 0.0967 | 31 Mya |
| mmul|14:122089998-122089003 | | ppyg|11:120600551-120599556 | | | | | 729.3 | | | 266.7 | 9.04 | 34.67 | 0.0124 | 0.1300 | 0.0952 | 31 Mya |
| mmul|14:122089998-122089003 | | ptro|11:122692080-122691085 | | | | | 740.6 | | | 255.4 | 11.03 | 36.04 | 0.0149 | 0.1411 | 0.1058 | 31 Mya |
| mmul|15:23082883-23084424 | | hsap|ENSG00000136866|ZFP37|LLNL505 | | | | | 1161.4 | | | 380.6 | 21.02 | 11.00 | 0.0181 | 0.0289 | 0.6246 | 31 Mya |
| mmul|15:23082883-23084424 | | ppyg|9:109523136-109521595 | | | | | 1141.9 | | | 400.1 | 17.47 | 13.48 | 0.0153 | 0.0337 | 0.4534 | 31 Mya |
| mmul|15:23082883-23084424 | | ptro|9:112523235-112521694 | | | | | 1142.6 | | | 399.4 | 18.51 | 11.34 | 0.0162 | 0.0284 | 0.5710 | 31 Mya |
| mmul|15:24640171-24638657 | | hsap|ENSG00000173258|ZNF483|LLNL566 | | | | | 1125.1 | | | 389.9 | 15.08 | 30.02 | 0.0134 | 0.0770 | 0.1735 | 31 Mya |
| mmul|15:24640171-24638657 | | ppyg|9:107944899-107946413 | | | | | 1114.2 | | | 400.8 | 12.03 | 30.02 | 0.0108 | 0.0749 | 0.1438 | 31 Mya |
| mmul|15:24640171-24638657 | | ptro|9:110996924-110998438 | | | | | 1125.5 | | | 389.5 | 15.08 | 29.99 | 0.0134 | 0.0770 | 0.1735 | 31 Mya |
| mmul|16:15896273-15897937 | | hsap|ENSG00000141040|ZNF287|LLNL139 | | | | | 1232.3 | | | 336.7 | 11.09 | 12.02 | 0.0090 | 0.0357 | 0.2532 | 31 Mya |
| mmul|16:15896273-15897937 | | ppyg|17:16894322-16892754 | | | | | 1197.4 | | | 371.6 | 8.14 | 11.89 | 0.0068 | 0.0320 | 0.2109 | 31 Mya |
| mmul|16:15896273-15897937 | | ptro|17_random:2566075-2564507 | | | | | 1228.2 | | | 340.8 | 9.09 | 13.09 | 0.0074 | 0.0384 | 0.1928 | 31 Mya |
| mmul|18:28214803-28215849 | | hsap|ENSG00000186812|ZNF397|LLNL151 | | | | | 666.8 | | | 221.2 | 5.07 | 14.33 | 0.0076 | 0.0648 | 0.1174 | 31 Mya |
| mmul|18:28214803-28215849 | | ppyg|18:47343350-47344384 | | | | | 1402.0 | | | 341.0 | 9.11 | 6.44 | 0.0065 | 0.0189 | 0.3421 | 31 Mya |
| mmul|18:28214803-28215849 | | ptro|18:31216875-31217924 | | | | | 788.3 | | | 258.7 | 7.25 | 14.98 | 0.0092 | 0.0579 | 0.1586 | 31 Mya |
| mmul|19:42807969-42806596 | | hsap|ENSG00000142065|ZFP14|LLNL540 | | | | | 1057.4 | | | 307.6 | 3.07 | 15.53 | 0.0029 | 0.0505 | 0.0577 | 31 Mya |
| mmul|19:42807969-42806596 | | ppyg|19_random:3292098-3290725 | | | | | 1057.2 | | | 316.8 | 3.07 | 18.72 | 0.0029 | 0.0591 | 0.0494 | 31 Mya |
| mmul|19:42807969-42806596 | | ptro|19:42748877-42750250 | | | | | 1071.4 | | | 302.6 | 7.18 | 16.61 | 0.0067 | 0.0549 | 0.1226 | 31 Mya |
| mmul|19:42860747-42859380 | | hsap|ENSG00000181007|ZNF545|LLNL220 | | | | | 1048.7 | | | 319.3 | 6.08 | 28.29 | 0.0058 | 0.0886 | 0.0656 | 31 Mya |
| mmul|19:42860747-42859380 | | ppyg|19:37212915-37211548 | | | | | 1064.0 | | | 304.0 | 8.30 | 27.03 | 0.0078 | 0.0889 | 0.0879 | 31 Mya |
| mmul|19:42860747-42859380 | | ptro|19:42692491-42693858 | | | | | 1037.2 | | | 330.8 | 6.12 | 25.90 | 0.0059 | 0.0783 | 0.0751 | 31 Mya |
| mmul|19:43097851-43099281 | | hsap|ENSG00000161298|ZNF382|LLNL541 | | | | | 1095.5 | | | 326.5 | 9.09 | 20.63 | 0.0083 | 0.0632 | 0.1310 | 31 Mya |
| mmul|19:43097851-43099281 | | ppyg|19:37458606-37460036 | | | | | 1103.8 | | | 327.2 | 9.05 | 20.61 | 0.0082 | 0.0630 | 0.1302 | 31 Mya |
| mmul|19:43097851-43099281 | | ptro|19:42460728-42459298 | | | | | 1100.4 | | | 330.6 | 11.11 | 20.63 | 0.0101 | 0.0624 | 0.1615 | 31 Mya |
| mmul|19:43644149-43645345 | | hsap|ENSG00000188283|ZNF383|LLNL231 | | | | | 928.6 | | | 268.4 | 7.15 | 16.13 | 0.0077 | 0.0601 | 0.1278 | 31 Mya |
| mmul|19:43644149-43645345 | | ppyg|19:38068934-38070130 | | | | | 932.0 | | | 265.0 | 7.08 | 11.79 | 0.0076 | 0.0445 | 0.1715 | 31 Mya |
| mmul|19:43644149-43645345 | | ptro|19:41828339-41827143 | | | | | 930.0 | | | 267.0 | 7.16 | 15.03 | 0.0077 | 0.0563 | 0.1361 | 31 Mya |
| mmul|19:43750114-43748294 | | hsap|ENSG00000196437|ZNF569|LLNL233 | | | | | 1398.4 | | | 422.6 | 5.03 | 20.28 | 0.0036 | 0.0480 | 0.0746 | 31 Mya |
| mmul|19:43750114-43748294 | | ppyg|19:38250121-38248301 | | | | | 1414.7 | | | 406.3 | 4.95 | 22.63 | 0.0035 | 0.0557 | 0.0634 | 31 Mya |
| mmul|19:43750114-43748294 | | ptro|19:42897338-42895518 | | | | | 1398.0 | | | 423.0 | 5.03 | 20.26 | 0.0036 | 0.0479 | 0.0747 | 31 Mya |
| mmul|19:43975674-43974313 | | hsap|ENSG00000120784|ZFP30|LLNL136 | | | | | 1033.1 | | | 289.9 | 8.16 | 19.77 | 0.0079 | 0.0682 | 0.1161 | 31 Mya |
| mmul|19:43975674-43974313 | | ppyg|19:38458942-38457620 | | | | | 1054.8 | | | 268.2 | 8.23 | 23.17 | 0.0078 | 0.0864 | 0.0899 | 31 Mya |
| mmul|19:43975674-43974313 | | ptro|19:43137775-43136453 | | | | | 1037.8 | | | 285.2 | 9.24 | 20.93 | 0.0089 | 0.0734 | 0.1210 | 31 Mya |
| mmul|19:50363998-50362184 | | hsap|ENSG00000124459|ZNF45|LLNL243 | | | | | 1300.3 | | | 505.7 | 16.12 | 33.33 | 0.0124 | 0.0659 | 0.1888 | 31 Mya |
| mmul|19:50363998-50362184 | | ppyg|19:45158948-45157140 | | | | | 1275.6 | | | 533.4 | 20.54 | 36.38 | 0.0161 | 0.0682 | 0.2355 | 31 Mya |
| mmul|19:50363998-50362184 | | ptro|19:49486483-49484675 | | | | | 1311.1 | | | 497.9 | 16.13 | 34.50 | 0.0123 | 0.0693 | 0.1782 | 31 Mya |
| mmul|19:50748033-50745532 | | hsap|ENSG00000062370|ZNF228|LLNL256 | | | | | 1834.4 | | | 667.6 | 37.61 | 33.31 | 0.0205 | 0.0499 | 0.4113 | 31 Mya |
| mmul|19:50748033-50745532 | | ppyg|19:45554670-45552169 | | | | | 1824.2 | | | 677.8 | 41.96 | 33.08 | 0.0230 | 0.0488 | 0.4702 | 31 Mya |
| mmul|19:50748033-50745532 | | ptro|19:49925325-49922824 | | | | | 1862.3 | | | 639.7 | 35.57 | 35.70 | 0.0191 | 0.0558 | 0.3419 | 31 Mya |
| mmul|19:50869759-50868017 | | hsap|ENSG00000167384|ZNF180|LLNL258 | | | | | 1377.0 | | | 366.0 | 20.38 | 26.72 | 0.0148 | 0.0730 | 0.2026 | 31 Mya |
| mmul|19:50869759-50868017 | | ppyg|19:45704750-45703008 | | | | | 1340.1 | | | 402.9 | 19.43 | 31.18 | 0.0145 | 0.0774 | 0.1878 | 31 Mya |
| mmul|19:50869759-50868017 | | ptro|19:50071251-50069509 | | | | | 1363.7 | | | 379.3 | 19.36 | 24.35 | 0.0142 | 0.0642 | 0.2214 | 31 Mya |
| mmul|19:62371830-62370511 | | hsap|ENSG00000018869|ZNF582|LLNL293 | | | | | 994.1 | | | 325.9 | 16.30 | 19.65 | 0.0164 | 0.0603 | 0.2725 | 31 Mya |
| mmul|19:62371830-62370511 | | ppyg|19:58376972-58375653 | | | | | 1035.2 | | | 284.8 | 18.32 | 22.36 | 0.0177 | 0.0785 | 0.2253 | 31 Mya |
| mmul|19:62371830-62370511 | | ptro|19:62230724-62229405 | | | | | 1004.5 | | | 315.5 | 16.37 | 21.96 | 0.0163 | 0.0696 | 0.2336 | 31 Mya |
| mmul|19:62412162-62413637 | | hsap|ENSG00000198440|ZNF583|LLNL294 | | | | | 1115.7 | | | 360.3 | 8.03 | 11.71 | 0.0072 | 0.0325 | 0.2224 | 31 Mya |
| mmul|19:62412162-62413637 | | ppyg|19:58419197-58420672 | | | | | 1084.5 | | | 391.5 | 10.09 | 9.40 | 0.0093 | 0.0240 | 0.3884 | 31 Mya |
| mmul|19:62412162-62413637 | | ptro|19:62268797-62270272 | | | | | 1125.5 | | | 350.5 | 9.12 | 11.74 | 0.0081 | 0.0335 | 0.2403 | 31 Mya |
| mmul|19:62516627-62518336 | | hsap|ENSG00000196867|ZFP28|LLNL297 | | | | | 1271.7 | | | 438.3 | 11.19 | 21.43 | 0.0088 | 0.0489 | 0.1790 | 31 Mya |
| mmul|19:62516627-62518336 | | ppyg|19:58561757-58563466 | | | | | 1239.5 | | | 470.5 | 10.16 | 25.78 | 0.0082 | 0.0548 | 0.1494 | 31 Mya |
| mmul|19:62516627-62518336 | | ptro|19:62401349-62403058 | | | | | 1285.0 | | | 425.0 | 11.18 | 22.57 | 0.0087 | 0.0531 | 0.1630 | 31 Mya |
| mmul|20:23717068-23716145 | | hsap|ENSG00000155592|ZKSCAN2|LLNL593 | | | | | 656.9 | | | 264.1 | 13.14 | 10.62 | 0.0200 | 0.0402 | 0.4981 | 31 Mya |
| mmul|20:23717068-23716145 | | ppyg|16:24415998-24415075 | | | | | 659.2 | | | 264.8 | 13.12 | 11.70 | 0.0199 | 0.0442 | 0.4514 | 31 Mya |
| mmul|20:23717068-23716145 | | ptro|16:25546166-25545243 | | | | | 666.3 | | | 257.7 | 13.13 | 12.89 | 0.0197 | 0.0500 | 0.3943 | 31 Mya |
| mmul|20:28674124-28672943 | | hsap|ENSG00000156853|ZNF689|LLNL116 | | | | | 927.2 | | | 254.8 | 1.02 | 25.45 | 0.0011 | 0.0999 | 0.0109 | 31 Mya |
| mmul|20:28674124-28672943 | | ppyg|16:29121419-29120238 | | | | | 923.6 | | | 258.4 | 2.03 | 26.67 | 0.0022 | 0.1032 | 0.0211 | 31 Mya |
| mmul|20:28674124-28672943 | | ptro|16:30989891-30988710 | | | | | 925.1 | | | 256.9 | 1.02 | 27.80 | 0.0011 | 0.1082 | 0.0101 | 31 Mya |
| mmul|20:3427874-3429043 | | hsap|ENSG00000006194|ZNF263|LLNL102 | | | | | 831.5 | | | 332.5 | 7.15 | 26.97 | 0.0086 | 0.0811 | 0.1060 | 31 Mya |
| mmul|20:3427874-3429043 | | ptro|16:3407167-3408414 | | | | | 835.9 | | | 331.1 | 4.10 | 25.89 | 0.0049 | 0.0782 | 0.0623 | 31 Mya |
| mmul|20:66925735-66927420 | | hsap|ENSG00000177412|ZFP90|LLNL596 | | | | | 1212.7 | | | 449.3 | 15.40 | 28.22 | 0.0127 | 0.0628 | 0.2018 | 31 Mya |
| mmul|20:66925735-66927420 | | ppyg|16:55959852-55961513 | | | | | 1200.6 | | | 461.4 | 12.25 | 27.04 | 0.0102 | 0.0586 | 0.1749 | 31 Mya |
| mmul|20:66925735-66927420 | | ptro|16:68351061-68352722 | | | | | 1218.4 | | | 443.6 | 16.45 | 29.50 | 0.0135 | 0.0665 | 0.2024 | 31 Mya |
| mmul|20:71209917-71211707 | | hsap|ENSG00000167377|ZNF23|LLNL123 | | | | | 1376.3 | | | 414.7 | 12.39 | 27.08 | 0.0090 | 0.0653 | 0.1372 | 31 Mya |
| mmul|20:71209917-71211707 | | ppyg|16:60386718-60388508 | | | | | 1352.9 | | | 438.1 | 13.12 | 27.16 | 0.0097 | 0.0620 | 0.1564 | 31 Mya |
| mmul|20:71209917-71211707 | | ptro|16:71305419-71303629 | | | | | 1372.4 | | | 418.6 | 14.41 | 28.13 | 0.0105 | 0.0672 | 0.1561 | 31 Mya |
| mmul|20:73278173-73279285 | | hsap|ENSG00000184517|ZFP1|LLNL127 | | | | | 791.3 | | | 288.7 | 7.04 | 25.09 | 0.0089 | 0.0869 | 0.1027 | 31 Mya |
| mmul|20:73278173-73279285 | | ppyg|16:62490398-62491510 | | | | | 810.2 | | | 302.8 | 8.02 | 22.59 | 0.0099 | 0.0746 | 0.1333 | 31 Mya |
| mmul|20:73278173-73279285 | | ptro|16:75114718-75115800 | | | | | 803.7 | | | 279.3 | 7.07 | 27.51 | 0.0088 | 0.0985 | 0.0892 | 31 Mya |
| mmul|3:186394391-186392346 | | hsap|ENSG00000197362|ZNF786|LLNL464 | | | | | 1602.1 | | | 440.9 | 61.68 | 50.79 | 0.0385 | 0.1152 | 0.3340 | 31 Mya |
| mmul|3:186394391-186392346 | | ppyg|7:146820840-146818792 | | | | | 1603.5 | | | 439.5 | 56.44 | 59.55 | 0.0352 | 0.1355 | 0.2594 | 31 Mya |
| mmul|3:186394391-186392346 | | ptro|7:149715472-149713424 | | | | | 1612.2 | | | 430.8 | 59.17 | 53.72 | 0.0367 | 0.1247 | 0.2945 | 31 Mya |
| mmul|3:186569458-186570312 | | hsap|ENSG00000170260|ZNF212|LLNL467 | | | | | 643.2 | | | 211.8 | 6.05 | 14.53 | 0.0094 | 0.0686 | 0.1368 | 31 Mya |
| mmul|3:186569458-186570312 | | ppyg|7:147029080-147029934 | | | | | 644.2 | | | 210.8 | 8.05 | 11.07 | 0.0125 | 0.0525 | 0.2384 | 31 Mya |
| mmul|3:186569458-186570312 | | ptro|7:149906084-149906938 | | | | | 636.9 | | | 218.1 | 7.07 | 14.46 | 0.0111 | 0.0663 | 0.1677 | 31 Mya |
| mmul|3:46776582-46777922 | | hsap|ENSG00000197343|ZNF655|LLNL457 | | | | | 997.1 | | | 343.9 | 13.06 | 17.68 | 0.0131 | 0.0514 | 0.2544 | 31 Mya |
| mmul|3:46776582-46777922 | | ppyg|7:8477198-8478538 | | | | | 1025.8 | | | 315.2 | 14.05 | 15.48 | 0.0137 | 0.0491 | 0.2794 | 31 Mya |
| mmul|3:46776582-46777922 | | ptro|7:99346785-99348125 | | | | | 1011.1 | | | 329.9 | 13.04 | 20.09 | 0.0129 | 0.0609 | 0.2118 | 31 Mya |
| mmul|3:46828832-46829662 | | hsap|ENSG00000197037|ZNF498|LLNL672 | | | | | 636.2 | | | 185.8 | 4.01 | 27.18 | 0.0063 | 0.1463 | 0.0433 | 31 Mya |
| mmul|3:46828832-46829662 | | ppyg|7:8539554-8540384 | | | | | 647.2 | | | 183.8 | 2.98 | 21.98 | 0.0046 | 0.1196 | 0.0388 | 31 Mya |
| mmul|3:46828832-46829662 | | ptro|7:99404571-99405401 | | | | | 645.6 | | | 185.4 | 4.00 | 24.57 | 0.0062 | 0.1325 | 0.0470 | 31 Mya |
| mmul|3:47309763-47310653 | | hsap|ENSG00000106261|ZKSCAN1|LLNL562 | | | | | 661.4 | | | 229.6 | 9.13 | 19.26 | 0.0138 | 0.0839 | 0.1644 | 31 Mya |
| mmul|3:47309763-47310653 | | ppyg|7:9013870-9014760 | | | | | 672.0 | | | 219.0 | 6.05 | 20.43 | 0.0090 | 0.0933 | 0.0966 | 31 Mya |
| mmul|3:47309763-47310653 | | ptro|7:99885027-99885917 | | | | | 667.2 | | | 223.8 | 8.07 | 18.15 | 0.0121 | 0.0811 | 0.1498 | 31 Mya |
| mmul|3:47351027-47349960 | | hsap|ENSG00000166526|ZNF3|LLNL460 | | | | | 808.9 | | | 253.1 | 5.02 | 21.01 | 0.0062 | 0.0830 | 0.0752 | 31 Mya |
| mmul|3:47351027-47349960 | | ppyg|7:9057879-9056812 | | | | | 826.1 | | | 241.9 | 9.09 | 20.01 | 0.0110 | 0.0827 | 0.1333 | 31 Mya |
| mmul|3:47351027-47349960 | | ptro|7:99924886-99923819 | | | | | 813.0 | | | 255.0 | 6.10 | 23.41 | 0.0075 | 0.0918 | 0.0812 | 31 Mya |
| mmul|4:27214129-27212174 | | hsap|ENSG00000096654|ZNF184|LLNL426 | | | | | 1449.8 | | | 506.2 | 5.07 | 19.19 | 0.0035 | 0.0379 | 0.0923 | 31 Mya |
| mmul|4:27214129-27212174 | | ppyg|6:28348798-28346843 | | | | | 1448.0 | | | 508.0 | 8.11 | 21.44 | 0.0056 | 0.0422 | 0.1330 | 31 Mya |
| mmul|4:27214129-27212174 | | ptro|6:27958750-27956795 | | | | | 1445.9 | | | 510.1 | 5.06 | 20.30 | 0.0035 | 0.0398 | 0.0881 | 31 Mya |
| mmul|6:175497689-175499269 | | hsap|ENSG00000178338|ZNF354B|LLNL419 | | | | | 1267.5 | | | 313.5 | 17.36 | 46.81 | 0.0137 | 0.1493 | 0.0920 | 31 Mya |
| mmul|6:175497689-175499269 | | ppyg|5:181472143-181473723 | | | | | 1254.2 | | | 326.8 | 24.71 | 45.36 | 0.0197 | 0.1388 | 0.1419 | 31 Mya |
| mmul|6:175497689-175499269 | | ptro|5:181333752-181335332 | | | | | 1265.2 | | | 315.8 | 19.48 | 46.64 | 0.0154 | 0.1477 | 0.1043 | 31 Mya |
| mmul|6:175548282-175549748 | | hsap|ENSG00000198939|ZFP2|LLNL536 | | | | | 1161.4 | | | 305.6 | 20.32 | 28.51 | 0.0175 | 0.0933 | 0.1870 | 31 Mya |
| mmul|6:175548282-175549748 | | ppyg|5:181519489-181520901 | | | | | 1101.5 | | | 311.5 | 19.28 | 23.64 | 0.0175 | 0.0759 | 0.2313 | 31 Mya |
| mmul|6:175548282-175549748 | | ptro|5:181380586-181382052 | | | | | 1155.6 | | | 311.4 | 22.30 | 26.10 | 0.0193 | 0.0838 | 0.2305 | 31 Mya |
| mmul|6:175582001-175583329 | | hsap|ENSG00000178187|ZNF454|LLNL420 | | | | | 958.2 | | | 334.8 | 22.81 | 72.62 | 0.0238 | 0.2169 | 0.1095 | 31 Mya |
| mmul|6:175582001-175583329 | | ppyg|5:181553291-181554616 | | | | | 966.0 | | | 351.0 | 19.61 | 69.60 | 0.0203 | 0.1983 | 0.1026 | 31 Mya |
| mmul|6:175582001-175583329 | | ptro|5:181414332-181415657 | | | | | 969.8 | | | 347.2 | 21.72 | 74.06 | 0.0224 | 0.2133 | 0.1049 | 31 Mya |
| mmul|6:175657646-175659082 | | hsap|ENSG00000197083|LLNL1080|LLNL1080 | | | | | 1110.8 | | | 326.2 | 9.00 | 19.80 | 0.0081 | 0.0607 | 0.1336 | 31 Mya |
| mmul|6:175657646-175659082 | | ppyg|5:181626117-181627553 | | | | | 1146.6 | | | 290.4 | 6.99 | 15.48 | 0.0061 | 0.0533 | 0.1146 | 31 Mya |
| mmul|6:175657646-175659082 | | ptro|5:181483156-181484592 | | | | | 1128.5 | | | 308.5 | 9.03 | 18.85 | 0.0080 | 0.0611 | 0.1307 | 31 Mya |
| mmul|6:175697678-175699090 | | hsap|ENSG00000177932|ZNF354C|LLNL421 | | | | | 1044.6 | | | 368.4 | 23.40 | 49.51 | 0.0224 | 0.1344 | 0.1665 | 31 Mya |
| mmul|6:175697678-175699090 | | ppyg|5:181676021-181677436 | | | | | 1060.8 | | | 352.2 | 19.20 | 56.42 | 0.0181 | 0.1602 | 0.1133 | 31 Mya |
| mmul|6:175697678-175699090 | | ptro|5:181530957-181532369 | | | | | 1047.5 | | | 365.5 | 19.27 | 52.16 | 0.0184 | 0.1427 | 0.1288 | 31 Mya |
| mmul|7:21798072-21797206 | | hsap|ENSG00000140265|ZSCAN29|LLNL94 | | | | | 668.6 | | | 198.4 | 10.03 | 14.25 | 0.0150 | 0.0718 | 0.2092 | 31 Mya |
| mmul|7:21798072-21797206 | | ppyg|15:39820918-39820052 | | | | | 672.7 | | | 194.3 | 9.01 | 10.88 | 0.0134 | 0.0560 | 0.2396 | 31 Mya |
| mmul|7:21798072-21797206 | | ptro|15:40486727-40485861 | | | | | 669.1 | | | 197.9 | 9.03 | 11.91 | 0.0135 | 0.0602 | 0.2241 | 31 Mya |
| mmul|8:147490905-147492719 | | hsap|ENSG00000147789|ZNF7|LLNL491 | | | | | 1000.1 | | | 433.9 | 4.10 | 25.86 | 0.0041 | 0.0596 | 0.0693 | 31 Mya |
| mmul|8:147490905-147492719 | | ppyg|8:153222079-153223893 | | | | | 1307.1 | | | 507.9 | 22.48 | 38.19 | 0.0172 | 0.0752 | 0.2285 | 31 Mya |
| mmul|8:147490905-147492719 | | ptro|8:144853468-144855282 | | | | | 1302.2 | | | 512.8 | 17.32 | 42.92 | 0.0133 | 0.0837 | 0.1590 | 31 Mya |
| mmul|8:147533183-147531864 | | hsap|ENSG00000196150|ZNF250|LLNL492 | | | | | 972.5 | | | 347.5 | 7.00 | 25.02 | 0.0072 | 0.0720 | 0.1006 | 31 Mya |
| mmul|8:147533183-147531864 | | ppyg|8:153277260-153275941 | | | | | 971.1 | | | 348.9 | 9.03 | 27.32 | 0.0093 | 0.0783 | 0.1194 | 31 Mya |
| mmul|8:147533183-147531864 | | ptro|8:144903957-144902638 | | | | | 966.6 | | | 353.4 | 8.02 | 26.15 | 0.0083 | 0.0740 | 0.1127 | 31 Mya |
| mmul|9:37898254-37896758 | | hsap|ENSG00000198105|ZNF248|LLNL41 | | | | | 1098.5 | | | 395.5 | 13.07 | 21.36 | 0.0119 | 0.0540 | 0.2202 | 31 Mya |
| mmul|9:37898254-37896758 | | ppyg|10:38171915-38170416 | | | | | 1078.7 | | | 418.3 | 12.08 | 16.90 | 0.0112 | 0.0404 | 0.2768 | 31 Mya |
| mmul|9:37898254-37896758 | | ptro|10:38689712-38688213 | | | | | 1082.9 | | | 414.1 | 17.11 | 20.17 | 0.0158 | 0.0487 | 0.3252 | 31 Mya |
| mmul|X:133607507-133608388 | | hsap|ENSG00000173275|ZNF449|LLNL537 | | | | | 646.6 | | | 235.4 | 0.97 | 10.17 | 0.0015 | 0.0432 | 0.0358 | 31 Mya |
| mmul|X:133607507-133608388 | | ppyg|X:134857435-134858376 | | | | | 643.6 | | | 238.4 | 1.03 | 11.23 | 0.0016 | 0.0471 | 0.0330 | 31 Mya |
| mmul|X:133607507-133608388 | | ptro|X:134840373-134841254 | | | | | 663.1 | | | 218.9 | 1.99 | 10.24 | 0.0030 | 0.0468 | 0.0647 | 31 Mya |
| mmul|X:151406872-151408188 | | hsap|ENSG00000063587|ZNF275|LLNL1112 | | | | | 879.2 | | | 245.8 | 6.07 | 36.55 | 0.0069 | 0.1487 | 0.0464 | 31 Mya |
| mmul|X:151406872-151408188 | | ppyg|X:153562362-153563678 | | | | | 1015.3 | | | 301.7 | 12.18 | 41.06 | 0.0120 | 0.1361 | 0.0882 | 31 Mya |
| mmul|X:151406872-151408188 | | ptro|X:152744894-152746210 | | | | | 1017.3 | | | 299.7 | 13.22 | 38.33 | 0.0130 | 0.1279 | 0.1015 | 31 Mya |
|  | | mean | | | | | 1042.7 | | | 340.9 | 12.55 | 25.76 | 0.0115 | 0.0781 | 0.1695 |  |
|  | | sdev | | | | | 281.9 | | | 97.7 | 10.10 | 12.82 | 0.0067 | 0.0377 | 0.1129 |  |
|  | |  | | | | |  | | |  |  |  |  |  |  |  |
| orangutan orthologs: | |  | | | | |  | | |  |  |  |  |  |  |  |
| ppyg|16:3400448-3401695 | | hsap|ENSG00000006194|ZNF263|LLNL102 | | | | | 828.9 | | | 335.1 | 4.97 | 13.67 | 0.0060 | 0.0408 | 0.1479 | 16 Mya |
| ppyg|19:58376972-58375653 | | hsap|ENSG00000018869|ZNF582|LLNL293 | | | | | 1015.1 | | | 304.9 | 12.18 | 13.08 | 0.0120 | 0.0429 | 0.2789 | 16 Mya |
| ppyg|19:45554670-45552169 | | hsap|ENSG00000062370|ZNF228|LLNL256 | | | | | 1866.0 | | | 636.0 | 26.31 | 19.02 | 0.0141 | 0.0299 | 0.4716 | 16 Mya |
| ppyg|X:153562362-153563678 | | hsap|ENSG00000063587|ZNF275|LLNL1112 | | | | | 879.3 | | | 245.7 | 2.99 | 17.84 | 0.0034 | 0.0726 | 0.0472 | 16 Mya |
| ppyg|6:28348798-28346843 | | hsap|ENSG00000096654|ZNF184|LLNL426 | | | | | 1404.4 | | | 551.6 | 3.09 | 10.43 | 0.0022 | 0.0189 | 0.1142 | 16 Mya |
| ppyg|7:9013870-9014760 | | hsap|ENSG00000106261|ZKSCAN1|LLNL562 | | | | | 623.7 | | | 267.3 | 6.05 | 7.14 | 0.0097 | 0.0267 | 0.3626 | 16 Mya |
| ppyg|19:38458942-38457620 | | hsap|ENSG00000120784|ZFP30|LLNL136 | | | | | 1065.1 | | | 257.9 | 6.18 | 13.49 | 0.0058 | 0.0523 | 0.1099 | 16 Mya |
| ppyg|19:45158948-45157140 | | hsap|ENSG00000124459|ZNF45|LLNL243 | | | | | 1315.3 | | | 487.7 | 9.08 | 11.46 | 0.0069 | 0.0235 | 0.2929 | 16 Mya |
| ppyg|1:207059439-207060689 | | hsap|ENSG00000125945|ZNF436|LLNL6 | | | | | 976.1 | | | 274.9 | 0.98 | 14.27 | 0.0010 | 0.0519 | 0.0197 | 16 Mya |
| ppyg|9:109523136-109521595 | | hsap|ENSG00000136866|ZFP37|LLNL505 | | | | | 1190.5 | | | 351.5 | 12.26 | 7.24 | 0.0103 | 0.0206 | 0.4989 | 16 Mya |
| ppyg|15:39820918-39820052 | | hsap|ENSG00000140265|ZSCAN29|LLNL94 | | | | | 669.1 | | | 197.9 | 3.01 | 5.36 | 0.0045 | 0.0271 | 0.1643 | 16 Mya |
| ppyg|17:16894322-16892754 | | hsap|ENSG00000141040|ZNF287|LLNL139 | | | | | 1232.7 | | | 336.3 | 5.05 | 4.30 | 0.0041 | 0.0128 | 0.3183 | 16 Mya |
| ppyg|19_random:3292098-3290725 | | hsap|ENSG00000142065|ZFP14|LLNL540 | | | | | 961.2 | | | 403.8 | 0.00 | 6.91 | 0.0000 | 0.0171 | 0.0010 | 16 Mya |
| ppyg|8:153222079-153223893 | | hsap|ENSG00000147789|ZNF7|LLNL491 | | | | | 1017.9 | | | 416.1 | 7.23 | 15.77 | 0.0071 | 0.0379 | 0.1887 | 16 Mya |
| ppyg|16:24415998-24415075 | | hsap|ENSG00000155592|ZKSCAN2|LLNL593 | | | | | 610.8 | | | 310.2 | 0.00 | 4.09 | 0.0000 | 0.0132 | 0.0010 | 16 Mya |
| ppyg|16:29121419-29120238 | | hsap|ENSG00000156853|ZNF689|LLNL116 | | | | | 910.5 | | | 271.5 | 1.00 | 14.96 | 0.0011 | 0.0551 | 0.0201 | 16 Mya |
| ppyg|19:37458606-37460036 | | hsap|ENSG00000161298|ZNF382|LLNL541 | | | | | 1059.1 | | | 362.9 | 6.04 | 6.24 | 0.0057 | 0.0172 | 0.3319 | 16 Mya |
| ppyg|2a:3432510-3433511 | | hsap|ENSG00000163067|ZNF2|LLNL345 | | | | | 696.2 | | | 305.8 | 9.19 | 18.16 | 0.0132 | 0.0594 | 0.2214 | 16 Mya |
| ppyg|11:120600551-120599556 | | hsap|ENSG00000166261|ZNF202|LLNL482 | | | | | 744.9 | | | 251.1 | 2.01 | 8.44 | 0.0027 | 0.0336 | 0.0796 | 16 Mya |
| ppyg|7:9057879-9056812 | | hsap|ENSG00000166526|ZNF3|LLNL460 | | | | | 813.8 | | | 248.2 | 5.05 | 9.68 | 0.0062 | 0.0390 | 0.1587 | 16 Mya |
| ppyg|16:60386718-60388508 | | hsap|ENSG00000167377|ZNF23|LLNL123 | | | | | 1294.8 | | | 496.2 | 6.09 | 11.51 | 0.0047 | 0.0232 | 0.2011 | 16 Mya |
| ppyg|19:45704750-45703008 | | hsap|ENSG00000167384|ZNF180|LLNL258 | | | | | 1381.4 | | | 361.6 | 13.12 | 13.99 | 0.0095 | 0.0387 | 0.2466 | 16 Mya |
| ppyg|12:47998417-47997665 | | hsap|ENSG00000167528|ZNF641|LLNL69 | | | | | 558.4 | | | 194.6 | 5.97 | 6.60 | 0.0107 | 0.0339 | 0.3142 | 16 Mya |
| ppyg|7:147029080-147029934 | | hsap|ENSG00000170260|ZNF212|LLNL467 | | | | | 630.6 | | | 224.4 | 6.05 | 12.07 | 0.0096 | 0.0538 | 0.1789 | 16 Mya |
| ppyg|9:107944899-107946413 | | hsap|ENSG00000173258|ZNF483|LLNL566 | | | | | 1145.2 | | | 369.8 | 2.98 | 10.58 | 0.0026 | 0.0286 | 0.0909 | 16 Mya |
| ppyg|X:134857435-134858376 | | hsap|ENSG00000173275|ZNF449|LLNL537 | | | | | 612.6 | | | 269.4 | 0.00 | 2.91 | 0.0000 | 0.0108 | 0.0010 | 16 Mya |
| ppyg|16:55959852-55961513 | | hsap|ENSG00000177412|ZFP90|LLNL596 | | | | | 1274.2 | | | 387.8 | 7.14 | 13.84 | 0.0056 | 0.0357 | 0.1556 | 16 Mya |
| ppyg|5:181676021-181677436 | | hsap|ENSG00000177932|ZNF354C|LLNL421 | | | | | 1041.5 | | | 374.5 | 10.10 | 17.08 | 0.0097 | 0.0456 | 0.2120 | 16 Mya |
| ppyg|5:181553291-181554616 | | hsap|ENSG00000178187|ZNF454|LLNL420 | | | | | 978.9 | | | 314.1 | 5.09 | 12.82 | 0.0052 | 0.0408 | 0.1268 | 16 Mya |
| ppyg|5:181472143-181473723 | | hsap|ENSG00000178338|ZNF354B|LLNL419 | | | | | 1238.5 | | | 342.5 | 9.04 | 16.58 | 0.0073 | 0.0484 | 0.1498 | 16 Mya |
| ppyg|19:37212915-37211548 | | hsap|ENSG00000181007|ZNF545|LLNL220 | | | | | 1126.4 | | | 241.6 | 3.04 | 6.43 | 0.0027 | 0.0266 | 0.1010 | 16 Mya |
| ppyg|16:62490398-62491510 | | hsap|ENSG00000184517|ZFP1|LLNL127 | | | | | 692.0 | | | 388.0 | 2.98 | 9.16 | 0.0043 | 0.0236 | 0.1841 | 16 Mya |
| ppyg|18:47343350-47344384 | | hsap|ENSG00000186812|ZNF397|LLNL151 | | | | | 659.4 | | | 228.6 | 2.04 | 6.36 | 0.0031 | 0.0278 | 0.1104 | 16 Mya |
| ppyg|19:38068934-38070130 | | hsap|ENSG00000188283|ZNF383|LLNL231 | | | | | 915.9 | | | 281.1 | 2.02 | 12.73 | 0.0022 | 0.0453 | 0.0489 | 16 Mya |
| ppyg|8:153277260-153275941 | | hsap|ENSG00000196150|ZNF250|LLNL492 | | | | | 972.3 | | | 347.7 | 3.99 | 10.57 | 0.0041 | 0.0304 | 0.1356 | 16 Mya |
| ppyg|19:38250121-38248301 | | hsap|ENSG00000196437|ZNF569|LLNL233 | | | | | 1347.0 | | | 474.0 | 2.02 | 8.72 | 0.0015 | 0.0184 | 0.0808 | 16 Mya |
| ppyg|12:136032978-136031185 | | hsap|ENSG00000196458|ZNF605|LLNL77 | | | | | 1375.5 | | | 409.5 | 15.96 | 15.07 | 0.0116 | 0.0368 | 0.3157 | 16 Mya |
| ppyg|19:58561757-58563466 | | hsap|ENSG00000196867|ZFP28|LLNL297 | | | | | 1293.8 | | | 416.2 | 5.05 | 10.61 | 0.0039 | 0.0255 | 0.1520 | 16 Mya |
| ppyg|7:8539554-8540384 | | hsap|ENSG00000197037|ZNF498|LLNL672 | | | | | 627.9 | | | 194.1 | 3.01 | 13.28 | 0.0048 | 0.0684 | 0.0703 | 16 Mya |
| ppyg|5:181626117-181627553 | | hsap|ENSG00000197083|LLNL1080|LLNL1080 | | | | | 1072.8 | | | 364.2 | 2.04 | 8.52 | 0.0019 | 0.0234 | 0.0795 | 16 Mya |
| ppyg|7:8477198-8478538 | | hsap|ENSG00000197343|ZNF655|LLNL457 | | | | | 990.5 | | | 350.5 | 9.01 | 6.38 | 0.0091 | 0.0182 | 0.4996 | 16 Mya |
| ppyg|7:146820840-146818792 | | hsap|ENSG00000197362|ZNF786|LLNL464 | | | | | 1578.0 | | | 471.0 | 24.30 | 28.59 | 0.0154 | 0.0607 | 0.2531 | 16 Mya |
| ppyg|10:38171915-38170416 | | hsap|ENSG00000198105|ZNF248|LLNL41 | | | | | 1134.8 | | | 362.2 | 5.22 | 10.25 | 0.0046 | 0.0283 | 0.1615 | 16 Mya |
| ppyg|19:58419197-58420672 | | hsap|ENSG00000198440|ZNF583|LLNL294 | | | | | 1098.2 | | | 377.8 | 1.98 | 6.23 | 0.0018 | 0.0165 | 0.1105 | 16 Mya |
| ppyg|5:181519489-181520901 | | hsap|ENSG00000198939|ZFP2|LLNL536 | | | | | 1085.8 | | | 327.2 | 7.06 | 19.96 | 0.0065 | 0.0610 | 0.1068 | 16 Mya |
| ppyg|1:207059439-207060689 | | ptro|1:23553804-23552554 | | | | | 972.3 | | | 278.7 | 0.00 | 13.04 | 0.0000 | 0.0468 | 0.0010 | 16 Mya |
| ppyg|10:38171915-38170416 | | ptro|10:38689712-38688213 | | | | | 1092.4 | | | 407.6 | 9.39 | 8.93 | 0.0086 | 0.0219 | 0.3934 | 16 Mya |
| ppyg|11:120600551-120599556 | | ptro|11:122692080-122691085 | | | | | 767.6 | | | 228.4 | 2.00 | 11.85 | 0.0026 | 0.0519 | 0.0499 | 16 Mya |
| ppyg|12:136032978-136031185 | | ptro|12:135064368-135062575 | | | | | 1339.1 | | | 454.9 | 7.90 | 10.55 | 0.0059 | 0.0232 | 0.2560 | 16 Mya |
| ppyg|12:47998417-47997665 | | ptro|12:41394549-41395301 | | | | | 548.7 | | | 204.3 | 3.95 | 5.41 | 0.0072 | 0.0265 | 0.2736 | 16 Mya |
| ppyg|15:39820918-39820052 | | ptro|15:40486727-40485861 | | | | | 672.0 | | | 195.0 | 2.02 | 3.20 | 0.0030 | 0.0164 | 0.1804 | 16 Mya |
| ppyg|16:24415998-24415075 | | ptro|16:25546166-25545243 | | | | | 682.5 | | | 241.5 | 0.00 | 6.33 | 0.0000 | 0.0262 | 0.0010 | 16 Mya |
| ppyg|16:29121419-29120238 | | ptro|16:30989891-30988710 | | | | | 911.0 | | | 271.0 | 1.00 | 14.93 | 0.0011 | 0.0551 | 0.0201 | 16 Mya |
| ppyg|16:3400448-3401695 | | ptro|16:3407167-3408414 | | | | | 828.3 | | | 338.7 | 4.06 | 23.57 | 0.0049 | 0.0696 | 0.0708 | 16 Mya |
| ppyg|16:55959852-55961513 | | ptro|16:68351061-68352722 | | | | | 1279.4 | | | 382.6 | 8.06 | 15.00 | 0.0063 | 0.0392 | 0.1611 | 16 Mya |
| ppyg|16:60386718-60388508 | | ptro|16:71305419-71303629 | | | | | 1302.0 | | | 489.0 | 8.07 | 12.62 | 0.0062 | 0.0258 | 0.2407 | 16 Mya |
| ppyg|16:62490398-62491510 | | ptro|16:75114718-75115800 | | | | | 732.3 | | | 350.7 | 3.00 | 11.33 | 0.0041 | 0.0323 | 0.1270 | 16 Mya |
| ppyg|17:16894322-16892754 | | ptro|17_random:2566075-2564507 | | | | | 1207.6 | | | 361.4 | 3.02 | 7.55 | 0.0025 | 0.0209 | 0.1196 | 16 Mya |
| ppyg|18:47343350-47344384 | | ptro|18:31216875-31217924 | | | | | 839.7 | | | 207.3 | 19.57 | 22.47 | 0.0233 | 0.1084 | 0.2150 | 16 Mya |
| ppyg|19:38068934-38070130 | | ptro|19:41828339-41827143 | | | | | 918.7 | | | 278.3 | 2.02 | 11.66 | 0.0022 | 0.0419 | 0.0527 | 16 Mya |
| ppyg|19:37458606-37460036 | | ptro|19:42460728-42459298 | | | | | 1067.3 | | | 363.7 | 8.11 | 6.26 | 0.0076 | 0.0172 | 0.4400 | 16 Mya |
| ppyg|19:37212915-37211548 | | ptro|19:42692491-42693858 | | | | | 1089.4 | | | 278.6 | 3.05 | 6.30 | 0.0028 | 0.0226 | 0.1232 | 16 Mya |
| ppyg|19_random:3292098-3290725 | | ptro|19:42748877-42750250 | | | | | 1052.7 | | | 321.3 | 4.11 | 6.04 | 0.0039 | 0.0188 | 0.2077 | 16 Mya |
| ppyg|19:38250121-38248301 | | ptro|19:42897338-42895518 | | | | | 1357.1 | | | 463.9 | 2.04 | 6.54 | 0.0015 | 0.0141 | 0.1048 | 16 Mya |
| ppyg|19:38458942-38457620 | | ptro|19:43137775-43136453 | | | | | 1068.2 | | | 254.8 | 7.16 | 14.63 | 0.0067 | 0.0574 | 0.1167 | 16 Mya |
| ppyg|19:45158948-45157140 | | ptro|19:49486483-49484675 | | | | | 1345.9 | | | 460.1 | 11.04 | 10.49 | 0.0082 | 0.0228 | 0.3614 | 16 Mya |
| ppyg|19:45554670-45552169 | | ptro|19:49925325-49922824 | | | | | 1923.7 | | | 578.3 | 22.12 | 21.34 | 0.0115 | 0.0369 | 0.3117 | 16 Mya |
| ppyg|19:45704750-45703008 | | ptro|19:50071251-50069509 | | | | | 1355.4 | | | 387.6 | 12.20 | 13.91 | 0.0090 | 0.0359 | 0.2512 | 16 Mya |
| ppyg|19:58376972-58375653 | | ptro|19:62230724-62229405 | | | | | 1027.3 | | | 292.7 | 12.12 | 15.34 | 0.0118 | 0.0524 | 0.2254 | 16 Mya |
| ppyg|19:58419197-58420672 | | ptro|19:62268797-62270272 | | | | | 1130.4 | | | 345.6 | 3.05 | 6.32 | 0.0027 | 0.0183 | 0.1451 | 16 Mya |
| ppyg|19:58561757-58563466 | | ptro|19:62401349-62403058 | | | | | 1318.1 | | | 391.9 | 5.01 | 11.76 | 0.0038 | 0.0300 | 0.1268 | 16 Mya |
| ppyg|2a:3432510-3433511 | | ptro|2a:96095783-96096784 | | | | | 684.5 | | | 317.5 | 7.12 | 10.45 | 0.0104 | 0.0329 | 0.3164 | 16 Mya |
| ppyg|5:181472143-181473723 | | ptro|5:181333752-181335332 | | | | | 1238.3 | | | 342.7 | 11.02 | 16.55 | 0.0089 | 0.0483 | 0.1839 | 16 Mya |
| ppyg|5:181519489-181520901 | | ptro|5:181380586-181382052 | | | | | 1088.7 | | | 324.3 | 9.15 | 18.84 | 0.0084 | 0.0581 | 0.1441 | 16 Mya |
| ppyg|5:181553291-181554616 | | ptro|5:181414332-181415657 | | | | | 964.0 | | | 362.0 | 3.08 | 13.86 | 0.0032 | 0.0383 | 0.0827 | 16 Mya |
| ppyg|5:181626117-181627553 | | ptro|5:181483156-181484592 | | | | | 1084.7 | | | 352.3 | 4.01 | 7.47 | 0.0037 | 0.0212 | 0.1732 | 16 Mya |
| ppyg|5:181676021-181677436 | | ptro|5:181530957-181532369 | | | | | 1054.5 | | | 358.5 | 6.01 | 14.91 | 0.0057 | 0.0416 | 0.1372 | 16 Mya |
| ppyg|6:28348798-28346843 | | ptro|6:27958750-27956795 | | | | | 1405.8 | | | 550.2 | 3.09 | 9.35 | 0.0022 | 0.0170 | 0.1266 | 16 Mya |
| ppyg|7:146820840-146818792 | | ptro|7:149715472-149713424 | | | | | 1593.1 | | | 455.9 | 21.03 | 30.00 | 0.0132 | 0.0658 | 0.2012 | 16 Mya |
| ppyg|7:147029080-147029934 | | ptro|7:149906084-149906938 | | | | | 625.8 | | | 229.2 | 7.13 | 9.79 | 0.0114 | 0.0427 | 0.2667 | 16 Mya |
| ppyg|7:8477198-8478538 | | ptro|7:99346785-99348125 | | | | | 1013.1 | | | 327.9 | 9.02 | 8.62 | 0.0089 | 0.0263 | 0.3382 | 16 Mya |
| ppyg|7:8539554-8540384 | | ptro|7:99404571-99405401 | | | | | 637.0 | | | 194.0 | 2.99 | 10.96 | 0.0047 | 0.0565 | 0.0838 | 16 Mya |
| ppyg|7:9013870-9014760 | | ptro|7:99885027-99885917 | | | | | 630.1 | | | 260.9 | 5.04 | 6.11 | 0.0080 | 0.0234 | 0.3410 | 16 Mya |
| ppyg|7:9057879-9056812 | | ptro|7:99924886-99923819 | | | | | 807.8 | | | 260.2 | 7.11 | 11.89 | 0.0088 | 0.0457 | 0.1916 | 16 Mya |
| ppyg|8:153222079-153223893 | | ptro|8:144853468-144855282 | | | | | 1273.3 | | | 541.7 | 14.26 | 23.40 | 0.0112 | 0.0432 | 0.2599 | 16 Mya |
| ppyg|8:153277260-153275941 | | ptro|8:144903957-144902638 | | | | | 960.6 | | | 359.4 | 5.00 | 11.61 | 0.0052 | 0.0323 | 0.1618 | 16 Mya |
| ppyg|9:107944899-107946413 | | ptro|9:110996924-110998438 | | | | | 1139.0 | | | 376.0 | 2.96 | 12.75 | 0.0026 | 0.0339 | 0.0772 | 16 Mya |
| ppyg|9:109523136-109521595 | | ptro|9:112523235-112521694 | | | | | 1167.3 | | | 374.7 | 9.10 | 8.21 | 0.0078 | 0.0219 | 0.3584 | 16 Mya |
| ppyg|X:134857435-134858376 | | ptro|X:134840373-134841254 | | | | | 673.9 | | | 208.1 | 1.01 | 3.02 | 0.0015 | 0.0145 | 0.1024 | 16 Mya |
| ppyg|X:153562362-153563678 | | ptro|X:152744894-152746210 | | | | | 1014.9 | | | 302.1 | 6.09 | 17.67 | 0.0060 | 0.0585 | 0.1019 | 16 Mya |
|  | | mean | | | | | 1032.1 | | | 341.2 | 6.40 | 11.72 | 0.0060 | 0.0358 | 0.1793 |  |
|  | | sdev | | | | | 286.6 | | | 95.4 | 5.35 | 5.40 | 0.0041 | 0.0172 | 0.1171 |  |
|  | |  | | | | |  | | |  |  |  |  |  |  |  |
| chimpanzee orthologs: | |  | | | | |  | | |  |  |  |  |  |  |  |
| ptro|16:3407167-3408414 | | hsap|ENSG00000006194|ZNF263|LLNL102 | | | | | 806.6 | | | 357.4 | 2.98 | 2.04 | 0.0037 | 0.0057 | 0.6552 | 6 Mya |
| ptro|19:62230724-62229405 | | hsap|ENSG00000018869|ZNF582|LLNL293 | | | | | 984.7 | | | 335.3 | 1.97 | 4.16 | 0.0020 | 0.0124 | 0.1647 | 6 Mya |
| ptro|19:49925325-49922824 | | hsap|ENSG00000062370|ZNF228|LLNL256 | | | | | 1835.6 | | | 666.4 | 15.05 | 12.53 | 0.0082 | 0.0188 | 0.4377 | 6 Mya |
| ptro|X:152744894-152746210 | | hsap|ENSG00000063587|ZNF275|LLNL1112 | | | | | 863.0 | | | 262.0 | 1.98 | 4.22 | 0.0023 | 0.0161 | 0.1451 | 6 Mya |
| ptro|6:27958750-27956795 | | hsap|ENSG00000096654|ZNF184|LLNL426 | | | | | 1344.0 | | | 612.0 | 0.00 | 3.06 | 0.0000 | 0.0050 | 0.0010 | 6 Mya |
| ptro|7:99885027-99885917 | | hsap|ENSG00000106261|ZKSCAN1|LLNL562 | | | | | 590.1 | | | 300.9 | 1.00 | 0.99 | 0.0017 | 0.0033 | 0.5141 | 6 Mya |
| ptro|19:43137775-43136453 | | hsap|ENSG00000120784|ZFP30|LLNL136 | | | | | 1047.1 | | | 275.9 | 1.05 | 3.01 | 0.0010 | 0.0109 | 0.0886 | 6 Mya |
| ptro|19:49486483-49484675 | | hsap|ENSG00000124459|ZNF45|LLNL243 | | | | | 1325.3 | | | 477.7 | 5.96 | 3.11 | 0.0045 | 0.0065 | 0.7014 | 6 Mya |
| ptro|1:23553804-23552554 | | hsap|ENSG00000125945|ZNF436|LLNL6 | | | | | 894.0 | | | 357.0 | 0.98 | 7.35 | 0.0011 | 0.0206 | 0.0550 | 6 Mya |
| ptro|9:112523235-112521694 | | hsap|ENSG00000136866|ZFP37|LLNL505 | | | | | 1177.7 | | | 364.3 | 5.06 | 1.02 | 0.0043 | 0.0028 | 1.5466 | 6 Mya |
| ptro|15:40486727-40485861 | | hsap|ENSG00000140265|ZSCAN29|LLNL94 | | | | | 662.3 | | | 204.7 | 0.99 | 2.11 | 0.0015 | 0.0103 | 0.1454 | 6 Mya |
| ptro|17_random:2566075-2564507 | | hsap|ENSG00000141040|ZNF287|LLNL139 | | | | | 1197.1 | | | 371.9 | 2.04 | 3.20 | 0.0017 | 0.0086 | 0.1954 | 6 Mya |
| ptro|19:42748877-42750250 | | hsap|ENSG00000142065|ZFP14|LLNL540 | | | | | 1057.6 | | | 307.4 | 4.12 | 3.01 | 0.0039 | 0.0098 | 0.3960 | 6 Mya |
| ptro|8:144853468-144855282 | | hsap|ENSG00000147789|ZNF7|LLNL491 | | | | | 1016.4 | | | 417.6 | 3.05 | 10.52 | 0.0030 | 0.0252 | 0.1183 | 6 Mya |
| ptro|16:25546166-25545243 | | hsap|ENSG00000155592|ZKSCAN2|LLNL593 | | | | | 751.6 | | | 169.4 | 0.00 | 2.22 | 0.0000 | 0.0131 | 0.0010 | 6 Mya |
| ptro|16:30989891-30988710 | | hsap|ENSG00000156853|ZNF689|LLNL116 | | | | | 894.5 | | | 287.5 | 0.00 | 6.15 | 0.0000 | 0.0214 | 0.0010 | 6 Mya |
| ptro|19:42460728-42459298 | | hsap|ENSG00000161298|ZNF382|LLNL541 | | | | | 1060.9 | | | 361.1 | 2.02 | 0.00 | 0.0019 | 0.0000 | 99.0000 | 6 Mya |
| ptro|2a:96095783-96096784 | | hsap|ENSG00000163067|ZNF2|LLNL345 | | | | | 723.0 | | | 279.0 | 2.02 | 7.31 | 0.0028 | 0.0262 | 0.1063 | 6 Mya |
| ptro|11:122692080-122691085 | | hsap|ENSG00000166261|ZNF202|LLNL482 | | | | | 748.5 | | | 247.5 | 3.97 | 7.38 | 0.0053 | 0.0298 | 0.1792 | 6 Mya |
| ptro|7:99924886-99923819 | | hsap|ENSG00000166526|ZNF3|LLNL460 | | | | | 777.9 | | | 284.1 | 1.01 | 4.20 | 0.0013 | 0.0148 | 0.0879 | 6 Mya |
| ptro|16:71305419-71303629 | | hsap|ENSG00000167377|ZNF23|LLNL123 | | | | | 1254.7 | | | 536.3 | 4.02 | 1.02 | 0.0032 | 0.0019 | 1.6995 | 6 Mya |
| ptro|12:41394549-41395301 | | hsap|ENSG00000167528|ZNF641|LLNL69 | | | | | 585.7 | | | 167.3 | 1.93 | 1.14 | 0.0033 | 0.0068 | 0.4890 | 6 Mya |
| ptro|7:149906084-149906938 | | hsap|ENSG00000170260|ZNF212|LLNL467 | | | | | 617.7 | | | 237.3 | 3.03 | 4.22 | 0.0049 | 0.0178 | 0.2768 | 6 Mya |
| ptro|9:110996924-110998438 | | hsap|ENSG00000173258|ZNF483|LLNL566 | | | | | 1070.5 | | | 444.5 | 0.00 | 2.04 | 0.0000 | 0.0046 | 0.0010 | 6 Mya |
| ptro|X:134840373-134841254 | | hsap|ENSG00000173275|ZNF449|LLNL537 | | | | | 743.5 | | | 138.5 | 1.04 | 0.00 | 0.0014 | 0.0000 | 99.0000 | 6 Mya |
| ptro|16:68351061-68352722 | | hsap|ENSG00000177412|ZFP90|LLNL596 | | | | | 1289.4 | | | 372.6 | 5.03 | 1.04 | 0.0039 | 0.0028 | 1.3834 | 6 Mya |
| ptro|5:181530957-181532369 | | hsap|ENSG00000177932|ZNF354C|LLNL421 | | | | | 995.9 | | | 417.1 | 3.98 | 4.09 | 0.0040 | 0.0098 | 0.4110 | 6 Mya |
| ptro|5:181414332-181415657 | | hsap|ENSG00000178187|ZNF454|LLNL420 | | | | | 1081.4 | | | 211.6 | 4.00 | 2.22 | 0.0037 | 0.0105 | 0.3519 | 6 Mya |
| ptro|5:181333752-181335332 | | hsap|ENSG00000178338|ZNF354B|LLNL419 | | | | | 1310.7 | | | 270.3 | 1.97 | 4.43 | 0.0015 | 0.0164 | 0.0924 | 6 Mya |
| ptro|19:42692491-42693858 | | hsap|ENSG00000181007|ZNF545|LLNL220 | | | | | 1102.0 | | | 266.0 | 0.00 | 4.18 | 0.0000 | 0.0157 | 0.0010 | 6 Mya |
| ptro|16:75114718-75115800 | | hsap|ENSG00000184517|ZFP1|LLNL127 | | | | | 850.7 | | | 229.3 | 0.00 | 4.17 | 0.0000 | 0.0182 | 0.0010 | 6 Mya |
| ptro|18:31216875-31217924 | | hsap|ENSG00000186812|ZNF397|LLNL151 | | | | | 626.3 | | | 261.7 | 0.00 | 1.02 | 0.0000 | 0.0039 | 0.0010 | 6 Mya |
| ptro|19:41828339-41827143 | | hsap|ENSG00000188283|ZNF383|LLNL231 | | | | | 854.7 | | | 342.3 | 2.05 | 3.01 | 0.0024 | 0.0088 | 0.2726 | 6 Mya |
| ptro|8:144903957-144902638 | | hsap|ENSG00000196150|ZNF250|LLNL492 | | | | | 891.4 | | | 428.6 | 0.98 | 0.99 | 0.0011 | 0.0023 | 0.4837 | 6 Mya |
| ptro|19:42897338-42895518 | | hsap|ENSG00000196437|ZNF569|LLNL233 | | | | | 1274.9 | | | 546.1 | 0.00 | 2.13 | 0.0000 | 0.0039 | 0.0010 | 6 Mya |
| ptro|12:135064368-135062575 | | hsap|ENSG00000196458|ZNF605|LLNL77 | | | | | 1436.2 | | | 348.8 | 8.04 | 10.99 | 0.0056 | 0.0315 | 0.1762 | 6 Mya |
| ptro|19:62401349-62403058 | | hsap|ENSG00000196867|ZFP28|LLNL297 | | | | | 1331.8 | | | 378.2 | 4.00 | 3.18 | 0.0030 | 0.0084 | 0.3582 | 6 Mya |
| ptro|7:99404571-99405401 | | hsap|ENSG00000197037|ZNF498|LLNL672 | | | | | 627.7 | | | 194.3 | 0.00 | 2.06 | 0.0000 | 0.0106 | 0.0010 | 6 Mya |
| ptro|5:181483156-181484592 | | hsap|ENSG00000197083|LLNL1080|LLNL1080 | | | | | 1012.2 | | | 424.8 | 3.95 | 5.23 | 0.0039 | 0.0123 | 0.3205 | 6 Mya |
| ptro|7:99346785-99348125 | | hsap|ENSG00000197343|ZNF655|LLNL457 | | | | | 1092.2 | | | 248.8 | 0.00 | 4.43 | 0.0000 | 0.0178 | 0.0010 | 6 Mya |
| ptro|7:149715472-149713424 | | hsap|ENSG00000197362|ZNF786|LLNL464 | | | | | 1604.8 | | | 444.2 | 9.95 | 11.95 | 0.0062 | 0.0269 | 0.2303 | 6 Mya |
| ptro|10:38689712-38688213 | | hsap|ENSG00000198105|ZNF248|LLNL41 | | | | | 997.8 | | | 499.2 | 3.99 | 1.00 | 0.0040 | 0.0020 | 2.0195 | 6 Mya |
| ptro|19:62268797-62270272 | | hsap|ENSG00000198440|ZNF583|LLNL294 | | | | | 1230.7 | | | 245.3 | 0.98 | 6.77 | 0.0008 | 0.0276 | 0.0293 | 6 Mya |
| ptro|5:181380586-181382052 | | hsap|ENSG00000198939|ZFP2|LLNL536 | | | | | 1189.5 | | | 277.5 | 2.02 | 8.82 | 0.0017 | 0.0318 | 0.0528 | 6 Mya |
|  | | mean | | | | | 1018.9 | | | 337.9 | 2.64 | 4.04 | 0.0024 | 0.0126 | 4.8226 |  |
|  | | sdev | | | | | 282.1 | | | 118.8 | 2.93 | 3.17 | 0.0020 | 0.0090 | 20.7941 |  |
| Complete list of specific orthologous pairs of sequences analyzed and their estimated non-synonymous and synonymous changes based on the output of codeml (runmode = -2). The sequences are grouped by expected divergence date and the last column gives the date, based on data at http://www.timetree.org. The dS values for the marmoset (cjac) orthologs are skewed at higher dS values. Similarly skewed dS distributions are apparent for the other divergence times. Inspection of dS values for specific ortholog pairs suggests that the variation in dS values is gene specific rather than pair comparison specific. For example, the dS values for “cjac|Contig100:9151-10692” with its human, chimp, orangutan and macaque orthologs are very similar (average 0.11), and the dS values for “cjac|Contig10834:33849-35114” with its orthologs are very similar (average 0.276). | | | | | | | | | | | | | | | | |
